# Supplementary material for: Dinuclear zinc catalyzed asymmetric Friedel–Crafts amidoalkylation of indoles with aryl aldimines
Source: Royal Society of Chemistry journal article supplement (doi:10.1039/c0ob01200a), 2011-01-01
Supplement: c0ob01200a.pdf [file c0ob01200a.pdf]

## Electronic Supplementary Information

### Dinuclear Zinc Catalyzed Asymmetric Friedel-Crafts Amido- alkylation of Indoles with Aryl Aldimines

Bei-Lei Wang, Nai-Kai Li, Jin-Xin Zhang, Guo-Gui Liu, Teng Liu, Qi Shen\*, and  
Xing-Wang Wang\*

*Key Laboratory of Organic Synthesis of Jiangsu Province, College of Chemistry, Chemical  
Engineering and Materials Science, Soochow University, Suzhou 215123, P. R. China.*

Fax: +86-512-65880378

E-mail: wangxw@suda.edu.cn.

#### General information

Unless otherwise stated, all reagents were purchased from commercial suppliers and used without further purification. All solvents employed in the reactions were distilled from appropriate drying agent prior to use. Organic solutions were concentrated under reduced pressure on an EYELA N-1001 rotary evaporator. Reactions were monitored by thin-layer chromatography (TLC) on silica gel precoated glass plates (0.2±0.03 mm thickness, GF-254, particle size 0.01–0.04 mm) from Yantai Chemical Industry Research Institute, P. R. China. Chromatograms were visualized by fluorescence quenching with UV light at 254 nm. Flash column chromatography was performed using silica gel (particle size 0.04–0.05 mm) from Yantai Chemical Industry Research Institute, P. R. China.

<sup>1</sup>H (400 MHz) and <sup>13</sup>C (101 MHz) spectra were recorded in DMSO-d<sub>6</sub> on Varian Inova-400 NMR spectrometer. Chemical shifts (δ ppm) are relative to the resonance of the deuterated solvent as the internal standard (DMSO-d<sub>6</sub>, δ 2.50 ppm for proton NMR, δ 39.51 ppm for carbon NMR). <sup>1</sup>H NMR data are reported as follows: chemical shift (δ, ppm), multiplicity (s = singlet, d = doublet, q = quartet, m = multiplet), coupling constants (J) and assignment. Data for <sup>13</sup>C NMR are reported in terms of chemical shift (δ, ppm). High-resolution mass spectra (HRMS) for all the compounds were determined on Micromass GCT-TOF mass spectrometer with ESI resource.

High performance liquid chromatography (HPLC) analysis was performed on a Waters 2695 and

Agilent Technologies 1200 Series instrument equipped with a quaternary pump, using a Daicel Chiralcel OD-H Column (250 x 4.6 mm). UV absorption was monitored at 210 nm to 254 nm.

Optical rotations were measured on an Autopol IV polarimeter, and  $[\alpha]_D$  values are reported in  $10^{-1}$   $\text{dg cm}^2 \text{g}^{-1}$ ; concentration (c) is reported in g/100 mL.

## Experimental section

### General procedure for the preparation of aldimines **3a-q**<sup>1</sup>:

N-sulfonyl imines **3a-q** described in this paper were prepared by condensation of the corresponding aldehydes with *p*-toluenesulfonamide according to the reported procedure with minor modification: the aldehyde (25.0 mmol), *p*-toluenesulfonamide (25.0 mmol), and  $\text{Si}(\text{OEt})_4$  (27.5 mmol, 1.1 equiv.) were combined into a flask equipped with an oil-water separator and heated at 160°C for 10 hours. The produced EtOH was collected in the oil-water separator and released it at regular intervals. After cooling down, the residue of the reaction was directly recrystallized from ethyl acetate and hexanes to provide N-sulfonyl imines **3a-q**. It should be noted that, in order to avoid the trace impurities affecting the reaction, the N-sulfonyl aryl aldimines were recrystallized at least for two times before they were utilized as starting materials for asymmetric Friedel-Crafts amidoalkylation.

### Procedure for the preparation of aldimine **3r**<sup>2</sup>

A mixture of aldehyde (10 mmol), phenylsulfonamide (10 mmol) and sodium benzenesulfinate (1.82 g, 11 mmol) in formic acid (15 mL) and  $\text{H}_2\text{O}$  (15 mL) was stirred for 12 h at rt. The resulting white precipitate was filtered off, washed with  $\text{H}_2\text{O}$  (2 x 10 mL), then pentane (10 mL), and dissolved in  $\text{CH}_2\text{Cl}_2$  (100 mL). Sat. aq  $\text{NaHCO}_3$  or  $\text{Na}_2\text{CO}_3$  (70 mL) was added and the solution was well stirred for 2 h at rt. The organic phase was decanted, and the aqueous phase was extracted with  $\text{CH}_2\text{Cl}_2$  (2 x 35 mL). The combined organic layers was washed by  $\text{H}_2\text{O}$  (30 mL), brine (30 mL) and dried over anhydrous  $\text{Na}_2\text{SO}_4$ . The solvent was removed under reduced pressure to yield the crude product. Crystallization from ethyl acetate and hexanes gave pure N-sulfonyl imine **3r**.

### General procedure and spectroscopic data for dinuclear zinc catalyzed asymmetric

### Friedel-Crafts amidoalkylation of indoles with aryl Aldimines:

Under an argon atmosphere, a solution of diethylzinc (50  $\mu$ L, 1.0 M in toluene, 0.05 mmol) was added to a stirred and cooled solution of **L4** (16 mg, 0.025 mmol) in toluene (0.5 mL) at 0°C. After the addition, the cold bath was removed and the resulting solution was allowed to stir at rt for 30 min. Then a solution of N-sulfonyl imines **3a** (65 mg, 0.25 mmol) and indole **2a** (146 mg, 1.25 mmol) in 1.0 mL toluene were added. The corresponding mixture was allowed to be stirred for another 2h at rt. After the reaction was complete (monitored by TLC), 10% NaHCO<sub>3</sub> (3 mL) was added. The mixture was extracted with ethyl acetate (3×10 mL). The organic layer was washed by H<sub>2</sub>O (5 mL), brine (5 mL) and dried over anhydrous Na<sub>2</sub>SO<sub>4</sub>. The solvent was evaporated *in vacuo* and the residue was purified by flash chromatography to afford the desired product **4a**.

The reaction procedures for the preparation of **4b-v** are identical with the above described for the preparation of **4a**. In order to demonstrate the reproducibility of the reaction, the crystals of the N-sulfonyl aryl aldimines (**3c**, **3d** and **3p**) were used to repeat the reaction under otherwise identical conditions. The results of control experiments showed that the reactions could be well reproduced in terms of yields and enantioselectivities (**4c**: 95% yield, 73:27 er vs 98% yield, 74:26 er; **4d**: 98% yield, 84:16 er vs 98% yield, 86:14 er; **4p**: 88% yield, 76:24 er vs 90% yield, 78:22 er).

### N-[Indol-3-yl-phenylmethyl]-4-methylbenzenesulfonamide (**4a**)

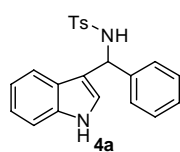

Colorless solid; 95% yield, 92:8 er, [Daicel Chiralcel OD-H, Hexanes/IPA = 75/25, flow rate: 1.0 mL·min<sup>-1</sup>,  $\lambda$  = 210.5 nm, t (major) = 10.451, t (minor) = 19.229];  $[\alpha]_D^{20}$  = +12.8 (c 0.5, Acetone); <sup>1</sup>H NMR (400 MHz, DMSO-d<sub>6</sub>):  $\delta$  10.87 (s, 1H), 8.49 (d, *J* = 8.8 Hz, 1H), 7.50 (d, *J* = 8.1 Hz, 2H), 7.33 – 7.24 (m, 4H), 7.20 – 7.09 (m, 5H), 7.04 (t, *J* = 7.6 Hz, 1H), 6.88 (t, *J* = 7.5 Hz, 1H), 6.78 (d, *J* = 2.1 Hz, 1H), 5.74 (d, *J* = 8.9 Hz, 1H), 2.28 (s, 3H); <sup>13</sup>C NMR (101 MHz, DMSO-d<sub>6</sub>):  $\delta$  141.83, 141.73, 138.86, 136.35, 128.93, 127.87, 127.06, 126.38, 123.67, 121.21, 120.86, 118.88, 118.75, 118.53, 115.70, 111.43, 54.46, 20.90; ESI-MS: m/z [M + Na]<sup>+</sup> calcd for C<sub>22</sub>H<sub>20</sub>N<sub>2</sub>O<sub>2</sub>SNa: 399.1143; found: 399.1130.

### N-[Indol-3-yl-(4- fluorophenyl)methyl]-4-methylbenzenesulfonamide (**4b**)

Colorless solid; 97% yield, 90:10 er, [Daicel Chiralcel OD-H, Hexanes / IPA = 75 / 25, flow rate: 1.0 mL·min<sup>-1</sup>,  $\lambda$  = 210.5 nm, t (major) = 11.224, t (minor) = 19.474];  $[\alpha]_D^{20}$  = +11.7 (c 0.5,

Acetone);  $^1\text{H}$  NMR (400 MHz, DMSO- $d_6$ ):  $\delta$  8.49 (d,  $J$  = 8.9 Hz, 1H), 7.49 (d,  $J$  = 8.2 Hz, 2H),

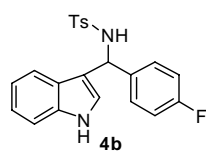

7.29 (dt,  $J$  = 8.4, 7.1 Hz, 4H), 7.13 (d,  $J$  = 8.1 Hz, 2H), 7.05 (t,  $J$  = 7.5 Hz, 1H), 6.97 (t,  $J$  = 8.8 Hz, 2H), 6.90 (t,  $J$  = 7.5 Hz, 1H), 6.76 (d,  $J$  = 1.7 Hz, 1H), 5.75 (d,  $J$  = 8.9 Hz, 1H), 2.28 (s, 3H);  $^{13}\text{C}$  NMR (101 MHz, DMSO- $d_6$ ):

$\delta$  147.32, 144.08, 143.21, 143.18, 141.80, 134.45, 134.35, 131.81, 130.77, 129.08, 126.70, 124.29, 123.99, 120.95, 120.03, 119.82, 116.87, 59.22, 26.27; ESI-MS:  $m/z$   $[\text{M} + \text{Na}]^+$  calcd for  $\text{C}_{22}\text{H}_{19}\text{FN}_2\text{O}_2\text{SNa}$ : 417.1047; found: 417.1061.

#### N-[Indol-3-yl-(4-chlorophenyl)methyl]-4-methylbenzenesulfonamide (4c)

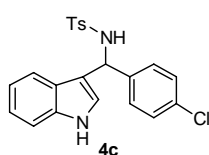

Colorless solid; 98% yield, 74:26 er, [Daicel Chiralcel OD-H, Hexanes / IPA = 75 / 25, flow rate: 1.0 mL·min $^{-1}$ ,  $\lambda$  = 254 nm,  $t$  (major) = 11.734,  $t$  (minor) = 21.264];  $[\alpha]_{\text{D}}^{20}$  = +5.2 (c 0.5, Acetone);  $^1\text{H}$  NMR (400 MHz, DMSO- $d_6$ ):  $\delta$

10.91 (d,  $J$  = 25.7 Hz, 1H), 8.50 (t,  $J$  = 8.0 Hz, 1H), 7.48 (d,  $J$  = 7.8 Hz, 2H), 7.30 (d,  $J$  = 8.0 Hz, 2H), 7.26 (d,  $J$  = 8.3 Hz, 2H), 7.20 (d,  $J$  = 8.2 Hz, 2H), 7.13 (d,  $J$  = 4.0 Hz, 2H), 6.94 (t,  $J$  = 7.3 Hz, 1H), 6.90 (t,  $J$  = 7.5 Hz, 1H), 6.77 (s, 1H), 5.73 (d,  $J$  = 8.7 Hz, 1H), 2.29 (s, 3H);  $^{13}\text{C}$  NMR (101 MHz, DMSO- $d_6$ ):  $\delta$  143.02, 141.53, 139.56, 137.39, 132.26, 129.98, 129.96, 128.79, 127.44, 126.34, 124.76, 122.34, 119.84, 119.63, 116.16, 112.49, 54.86, 21.88; ESI-MS:  $m/z$   $[\text{M} + \text{Na}]^+$  calcd for  $\text{C}_{22}\text{H}_{19}\text{ClN}_2\text{O}_2\text{SNa}$ : 433.0793; found: 433.0760.

#### N-[Indol-3-yl-(4-bromophenyl)methyl]-4-methylbenzenesulfonamide (4d)

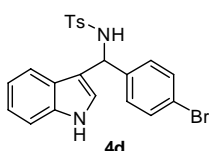

Colorless solid; 98% yield, 86:14 er, [Daicel Chiralcel OD-H, Hexanes / IPA = 75 / 25, flow rate: 1.0 mL·min $^{-1}$ ,  $\lambda$  = 210.5 nm,  $t$  (major) = 11.896,  $t$  (minor) = 20.941];  $[\alpha]_{\text{D}}^{20}$  = +10.8 (c 0.5, Acetone);  $^1\text{H}$  NMR (400 MHz, DMSO- $d_6$ ):

$\delta$  10.93 (s, 1H), 8.51 (d,  $J$  = 8.7 Hz, 1H), 7.49 (d,  $J$  = 7.9 Hz, 2H), 7.32 (dd,  $J$  = 11.5, 5.7 Hz, 4H), 7.20 (d,  $J$  = 8.1 Hz, 2H), 7.14 (d,  $J$  = 7.7 Hz, 2H), 7.06 (t,  $J$  = 7.5 Hz, 1H), 6.91 (t,  $J$  = 7.4 Hz, 1H), 6.79 (s, 1H), 5.73 (d,  $J$  = 8.7 Hz, 1H), 2.31 (s, 3H);  $^{13}\text{C}$  NMR (101 MHz, DMSO- $d_6$ ):  $\delta$  147.41, 146.31, 143.92, 141.76, 136.09, 134.72, 134.37, 131.82, 130.72, 129.15, 126.72, 125.16, 124.22, 124.02, 120.45, 116.87, 59.31, 26.30; ESI-MS:  $m/z$   $[\text{M} + \text{Na}]^+$  calcd for  $\text{C}_{22}\text{H}_{19}\text{BrN}_2\text{O}_2\text{SNa}$ : 477.0248; found: 477.0245.

#### N-[Indol-3-yl-(4-Methoxyphenyl)methyl]-4-methylbenzenesulfonamide (4e)

Colorless solid, 90% yield, 92:8 er, [Daicel Chiralcel OD-H, Hexanes / IPA = 75 / 25, flow rate: 1.0 mL·min $^{-1}$ ,  $\lambda$  = 221.3 nm,  $t$  (major) = 13.924,  $t$  (minor) = 27.338];  $[\alpha]_{\text{D}}^{20}$  = +7.5 (c 0.5,

Acetone);  $^1\text{H}$  NMR (400 MHz, DMSO- $d_6$ ):  $\delta$  10.86 (d,  $J$  = 52.5 Hz, 1H), 8.41 (t,  $J$  = 8.0 Hz, 1H),

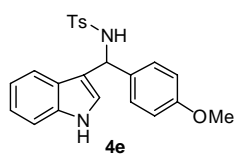

7.72 (d,  $J$  = 7.4 Hz, 1H), 7.49 (d,  $J$  = 7.4 Hz, 1H), 7.36 (d,  $J$  = 7.4 Hz, 1H),

7.30 (d,  $J$  = 7.7 Hz, 2H), 7.13 (t,  $J$  = 7.4 Hz, 3H), 7.04 (t,  $J$  = 8.0 Hz, 3H),

6.89 (t,  $J$  = 7.1 Hz, 1H), 6.81 (s, 1H), 6.71 (d,  $J$  = 7.7 Hz, 1H), 5.69 (d,  $J$  =

8.6 Hz, 1H), 3.68 (s, 3H), 2.28 (s, 3H);  $^{13}\text{C}$  NMR (101 MHz, DMSO- $d_6$ ):  $\delta$  158.04, 141.80, 138.93, 136.46, 133.76, 132.72, 129.37, 128.97, 128.31, 126.45, 123.56, 121.20, 118.52, 116.03, 113.28, 111.46, 55.05, 54.10, 20.93; ESI-MS:  $m/z$   $[\text{M} + \text{Na}]^+$  calcd for  $\text{C}_{23}\text{H}_{22}\text{N}_2\text{O}_3\text{SNa}$ : 429.1249; found: 429.1243.

#### N-[Indol-3-yl-(4-Methylphenyl)methyl]-4-methylbenzenesulfonamide (4f)

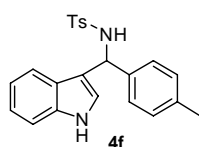

Colorless solid; 98% yield, 78:22 er, [Daicel Chiralcel OD-H, Hexanes / IPA

= 75 / 25, flow rate: 1.0 mL·min $^{-1}$ ,  $\lambda$  = 210 nm,  $t$  (major) = 9.660,  $t$  (minor) =

18.179];  $[\alpha]_{\text{D}}^{20}$  = +8.4 (c 0.5, Acetone);  $^1\text{H}$  NMR (400 MHz, DMSO- $d_6$ )  $\delta$

10.86 (s, 1H), 8.42 (d,  $J$  = 8.7 Hz, 1H), 7.50 (d,  $J$  = 7.8 Hz, 2H), 7.34 – 7.26 (m, 2H), 7.13 (d,  $J$  = 4.6 Hz, 4H), 7.04 (t,  $J$  = 7.5 Hz, 1H), 6.97 (d,  $J$  = 7.6 Hz, 2H), 6.87 (t,  $J$  = 7.4 Hz, 1H), 6.82 (s, 1H), 5.70 (d,  $J$  = 8.7 Hz, 1H), 2.28 (s, 3H), 2.22 (s, 3H);  $^{13}\text{C}$  NMR (101 MHz, DMSO- $d_6$ ):  $\delta$  141.86, 138.89, 138.78, 136.43, 135.75, 128.96, 128.45, 127.07, 126.44, 125.51, 123.66, 121.23, 118.96, 118.55, 115.85, 111.46, 54.34, 20.93, 20.67; ESI-MS:  $m/z$   $[\text{M} + \text{Na}]^+$  calcd for  $\text{C}_{23}\text{H}_{22}\text{N}_2\text{O}_2\text{SNa}$ : 413.1300; found: 413.1299.

#### N-[Indol-3-yl-(4-trifloroMethylphenyl)methyl]-4-methylbenzenesulfonamide (4g)

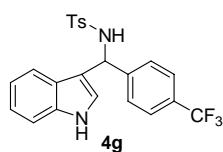

Colorless solid; 98% yield, 94:6 er, [Daicel Chiralcel OD-H, Hexanes /

IPA = 75 / 25, flow rate: 1.0 mL·min $^{-1}$ ,  $\lambda$  = 254 nm,  $t$  (major) = 11.219,  $t$

(minor) = 20.622];  $[\alpha]_{\text{D}}^{20}$  = +28.2 (c 1, Acetone);  $^1\text{H}$  NMR (400 MHz,

DMSO- $d_6$ )  $\delta$  10.95 (s, 1H), 8.58 (d,  $J$  = 8.0 Hz, 1H), 7.72 (d,  $J$  = 6.6 Hz, 1H), 7.47 (s, 3H), 7.42 – 7.26 (m, 4H), 7.09 (d,  $J$  = 6.3 Hz, 2H), 6.93 (t,  $J$  = 6.5 Hz, 1H), 6.78 (s, 1H), 5.83 (d,  $J$  = 8.3 Hz, 1H), 2.25 (s, 3H);  $^{13}\text{C}$  NMR (101 MHz, DMSO- $d_6$ ):  $\delta$  146.01, 142.05, 138.40, 136.43, 129.36, 128.99, 127.93, 126.51, 125.67, 124.85, 124.81, 124.76, 124.72, 123.91, 121.49, 118.83, 118.79, 114.79, 111.61, 109.39, 54.21, 20.95; ESI-MS:  $m/z$   $[\text{M} + \text{Na}]^+$  calcd for  $\text{C}_{23}\text{H}_{19}\text{F}_3\text{N}_2\text{O}_2\text{SNa}$ : 467.1107; found: 467.1024.

#### N-[Indol-3-yl-(2-chlorophenyl)methyl]-4-methylbenzenesulfonamide (4h)

Colorless solid; 98% yield, 92:8 er, [Daicel Chiralcel OD-H, Hexanes / IPA = 75 / 25, flow rate:

1.0 mL·min<sup>-1</sup>, λ = 210.5 nm, t (major) = 8.153, t (minor) = 20.030; [α]<sub>D</sub><sup>20</sup> = +51.2 (c 0.5, Acetone);

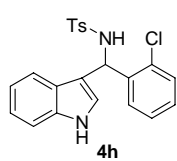

<sup>1</sup>H NMR (400 MHz, DMSO-d<sub>6</sub>): δ 8.58 (d, *J* = 8.6 Hz, 1H), 7.59 – 7.55 (m, 1H), 7.52 (d, *J* = 8.2 Hz, 2H), 7.35 (d, *J* = 8.2 Hz, 1H), 7.34 – 7.27 (m, 2H), 7.19 – 7.16 (m, 4H), 7.08 (t, *J* = 7.6 Hz, 1H), 6.93 (t, *J* = 7.5 Hz, 1H), 6.55 (s,

1H), 6.17 (d, *J* = 8.6 Hz, 1H), 2.30 (s, 3H); <sup>13</sup>C NMR (101 MHz, DMSO-d<sub>6</sub>): δ 142.20, 138.79, 138.31, 136.40, 131.44, 129.11, 128.84, 128.80, 128.34, 126.98, 126.37, 125.65, 124.18, 121.49, 118.81, 118.50, 114.08, 111.64, 50.63, 20.93; ESI-MS: *m/z* [M + Na]<sup>+</sup> calcd for C<sub>22</sub>H<sub>19</sub>ClN<sub>2</sub>O<sub>2</sub>SNa: 433.0748; found: 433.0751.

#### N-[Indol-3-yl-(2-fluorophenyl)methyl]-4-methylbenzenesulfonamide (4i)

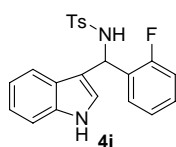

Colorless solid; 96% yield, 82:18 er, [Daicel Chiralcel OD-H, Hexanes / IPA = 75 / 25, flow rate: 1.0 mL·min<sup>-1</sup>, λ = 254 nm, t (major) = 9.792, t (minor) = 22.034]; [α]<sub>D</sub><sup>20</sup> = +43.2 (c 0.5, Acetone); <sup>1</sup>H NMR (400 MHz, DMSO-d<sub>6</sub>) δ

10.93 (s, 1H), 8.55 (d, *J* = 7.5 Hz, 1H), 7.50 (d, *J* = 8.0 Hz, 2H), 7.45 (d, *J* = 4.0 Hz, 1H), 7.31 (t, *J* = 8.0 Hz, 2H), 7.15 (d, *J* = 8.0 Hz, 2H), 7.07 (t, *J* = 8.0 Hz, 1H), 7.02 – 6.96 (m, 3H), 6.94 (t, *J* = 8.0 Hz, 1H), 6.73 (s, 3H), 6.02 (d, *J* = 8.0 Hz, 1H), 2.28 (s, 3H); <sup>13</sup>C NMR (101 MHz, DMSO-d<sub>6</sub>): δ 142.18, 138.34, 136.39, 129.10, 128.88, 128.84, 128.79, 128.67, 126.37, 125.43, 124.16, 123.75, 121.49, 118.82, 118.40, 114.97, 114.77, 114.44, 114.40, 114.37, 111.67, 111.65, 47.18, 47.16, 20.93; ESI-MS: *m/z* [M + Na]<sup>+</sup> calcd for C<sub>22</sub>H<sub>19</sub>FN<sub>2</sub>O<sub>2</sub>SNa: 417.1047; found: 417.1057.

#### N-[Indol-3-yl-(2-bromophenyl)methyl]-4-methylbenzenesulfonamide (4j)

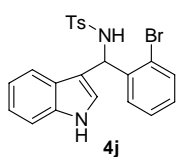

Colorless solid; 97% yield, 84:16 er, [Daicel Chiralcel OD-H, Hexanes / IPA = 75 / 25, flow rate: 1.0 mL·min<sup>-1</sup>, λ = 254 nm, t (major) = 8.553, t (minor) = 22.330]; [α]<sub>D</sub><sup>20</sup> = +43.2 (c 0.5, Acetone); <sup>1</sup>H NMR (400 MHz, DMSO-d<sub>6</sub>) δ

10.94 (s, 1H), 8.59 (d, *J* = 8.5 Hz, 1H), 7.57 (d, *J* = 7.7 Hz, 1H), 7.54 (d, *J* = 8.0 Hz, 2H), 7.45 (d, *J* = 7.9 Hz, 1H), 7.34 (t, *J* = 8.0 Hz, 2H), 7.24-7.16 (m, 3H), 7.09 (t, *J* = 7.5 Hz, 2H), 6.95 (t, *J* = 7.4 Hz, 1H), 6.50 (s, 1H), 6.16 (d, *J* = 8.4 Hz, 1H), 2.30 (s, 3H); <sup>13</sup>C NMR (101 MHz, DMSO-d<sub>6</sub>): δ 142.30, 140.39, 138.34, 136.48, 132.16, 129.19, 129.03, 128.67, 127.58, 126.47, 125.78, 124.40, 122.40, 121.59, 118.89, 118.67, 114.17, 111.72, 53.35, 21.00; ESI-MS: *m/z* [M + Na]<sup>+</sup> calcd for C<sub>22</sub>H<sub>19</sub>BrN<sub>2</sub>O<sub>2</sub>SNa: 477.0248, 479.0228; found: 477.0243, 479.0225.

#### N-[Indol-3-yl-(2-Methoxyphenyl)methyl]-4-methylbenzenesulfonamide (4k)

Colorless solid; 98% yield, 90:10 er, [Daicel Chiralcel OD-H, Hexanes / IPA = 75 / 25, flow rate:

1.0 mL·min<sup>-1</sup>,  $\lambda = 254$  nm, t (major) = 9.967, t (minor) = 22.403];  $[\alpha]_{\text{D}}^{20} = +46.3$  (c 1, Acetone); <sup>1</sup>H

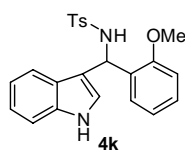

NMR (400 MHz, DMSO-d<sub>6</sub>):  $\delta$  10.80 (s, 1H), 8.29 (d,  $J = 8.0$  Hz, 1H), 7.45 (d,  $J = 8.0$  Hz, 2H), 7.28 – 7.39 (m, 3H), 7.10 (d,  $J = 8.0$  Hz, 2H), 7.04 (d,  $J = 8.0$  Hz, 1H), 6.91 (t,  $J = 8.0$  Hz, 1H), 6.75 (dd,  $J = 12.0, 8.0$  Hz, 1H), 6.65 (d,

$J = 8.0$  Hz, 1H), 6.16 (d,  $J = 12.0$  Hz, 1H), 3.63 (s, 3H), 2.27 (s, 3H); <sup>13</sup>C NMR (101 MHz, DMSO-d<sub>6</sub>):  $\delta$  156.00, 142.44, 139.20, 137.01, 130.06, 129.43, 128.55, 128.47, 126.97, 124.18, 121.87, 120.66, 119.45, 119.17, 116.42, 112.09, 111.07, 109.99, 55.93, 48.01, 21.53; ESI-MS: m/z  $[M + Na]^+$  calcd for C<sub>23</sub>H<sub>22</sub>N<sub>2</sub>O<sub>3</sub>SNa: 429.1249; found: 429.1253.

#### N-[Indol-3-yl-(3-methylphenyl)methyl]-4-methylbenzenesulfonamide (4l)

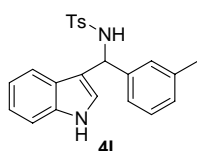

Colorless solid; 92% yield, 88:12 er, [Daicel Chiralcel OD-H, Hexanes / IPA = 75 / 25, flow rate: 1.0 mL·min<sup>-1</sup>,  $\lambda = 242.8$  nm, t (major) = 9.764, t (minor) = 14.796];  $[\alpha]_{\text{D}}^{20} = +10.4$  (c 0.5, Acetone); <sup>1</sup>H NMR (400 MHz, DMSO-d<sub>6</sub>):  $\delta$

8.42 (d,  $J = 12.0$  Hz, 1H), 7.48 (d,  $J = 7.9$  Hz, 2H), 7.38 – 7.25 (m, 2H), 7.12 (d,  $J = 7.9$  Hz, 3H), 7.05 (d,  $J = 4.7$  Hz, 2H), 6.91 (m, 3H), 6.80 (s, 1H), 5.69 (d,  $J = 12.0$  Hz, 1H), 2.28 (s, 3H), 2.14 (s, 3H); <sup>13</sup>C NMR (101 MHz, DMSO-d<sub>6</sub>):  $\delta$  147.18, 146.78, 144.18, 142.20, 141.74, 134.24, 133.16, 133.10, 131.78, 130.87, 129.62, 129.07, 126.59, 124.26, 123.92, 121.08, 116.82, 114.74, 59.89, 26.33, 26.27; ESI-MS: m/z  $[M + Na]^+$  calcd for C<sub>23</sub>H<sub>22</sub>N<sub>2</sub>O<sub>2</sub>SNa: 413.1300; found: 413.1299.

#### N-[Indol-3-yl-(3-chlorophenyl)methyl]-4-methylbenzenesulfonamide (4m)

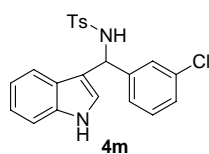

Colorless solid; 98% yield, 76:24 er, [Daicel Chiralcel OD-H, Hexanes / IPA = 75 / 25, flow rate: 1.0 mL·min<sup>-1</sup>,  $\lambda = 254$  nm, t (major) = 12.988, t (minor) = 16.128];  $[\alpha]_{\text{D}}^{20} = +10.57$  (c 0.5, Acetone); <sup>1</sup>H NMR (400 MHz,

DMSO-d<sub>6</sub>):  $\delta$  10.93 (s, 1H), 8.52 (d,  $J = 8.0$  Hz, 1H), 7.50 (d,  $J = 7.8$  Hz, 2H), 7.37 – 7.30 (m, 2H), 7.23 (s, 2H), 7.17 – 7.12 (m, 4H), 7.06 (t,  $J = 7.2$  Hz, 1H), 6.91 (t,  $J = 7.2$  Hz, 1H), 6.78 (s, 1H), 5.75 (d,  $J = 8.0$  Hz, 1H), 2.29 (s, 3H); <sup>13</sup>C NMR (101 MHz, DMSO-d<sub>6</sub>):  $\delta$  143.94, 142.12, 138.48, 136.40, 132.70, 129.77, 129.02, 126.92, 126.60, 126.42, 125.90, 125.35, 123.80, 121.42, 118.87, 118.72, 115.10, 111.57, 53.99, 20.95; ESI-MS: m/z  $[M + Na]^+$  calcd for C<sub>22</sub>H<sub>19</sub>ClN<sub>2</sub>O<sub>2</sub>SNa: 433.0753; found: 433.0751.

#### N-[Indol-3-yl-(2,4-Dichlorophenyl)methyl]-4-methylbenzenesulfonamide (4n)

Colorless solid; 98% yield, 95:5 er, [Daicel Chiralcel OD-H, Hexanes / IPA = 75 / 25, flow rate:

1.0 mL·min<sup>-1</sup>, λ = 254 nm, t (major) = 8.139, t (minor) = 21.301; [α]<sub>D</sub><sup>20</sup> = +68.6 (c 0.5, Acetone);

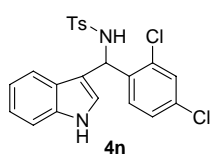

<sup>1</sup>H NMR (400 MHz, DMSO-d<sub>6</sub>) δ 10.98 (d, *J* = 9.4 Hz, 1H), 8.59 (t, *J* = 8.3 Hz, 1H), 7.50 (d, *J* = 5.0 Hz, 1H), 7.33 (d, *J* = 8.2 Hz, 1H), 7.29 (d, *J* = 7.9 Hz, 1H), 7.23 (d, *J* = 8.4 Hz, 1H), 7.19 (d, *J* = 7.9 Hz, 2H), 7.08 (t, *J* = 7.5

Hz, 1H), 6.93 (dd, *J* = 13.2, 5.8 Hz, 1H), 6.56 (d, *J* = 8.0 Hz, 1H), 6.08 (d, *J* = 8.4 Hz, 1H), 2.32 (s,

3H); <sup>13</sup>C NMR (101 MHz, DMSO-d<sub>6</sub>): δ 141.91, 137.72, 132.37, 132.11, 130.24, 129.34, 128.20,

127.23, 126.41, 125.67, 124.28, 121.61, 118.93, 118.46, 113.42, 111.72, 109.39, 54.92, 20.96;

ESI-MS: *m/z* [M + Na]<sup>+</sup> calcd for C<sub>22</sub>H<sub>18</sub>Cl<sub>2</sub>N<sub>2</sub>O<sub>2</sub>SNa: 467.0364; found: 467.0367.

#### N-[Indol-3-yl-(1-Naphthyl)methyl]-4-methylbenzenesulfonamide (4o)

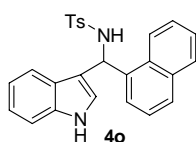

Colorless solid; 96% yield, 85:15 er, [Daicel Chiralcel OD-H, Hexanes / IPA = 75 / 25, flow rate: 1.0 mL·min<sup>-1</sup>, λ = 210.5 nm, t (major) = 10.563, t (minor) = 21.070]; [α]<sub>D</sub><sup>20</sup> = +62.4 (c 0.5, Acetone); <sup>1</sup>H NMR (400 MHz, DMSO-d<sub>6</sub>):

δ 10.85 (s, 1H), 8.59 (d, *J* = 7.8 Hz, 1H), 7.95 (d, *J* = 7.9 Hz, 1H), 7.89 (d, *J* = 7.6 Hz, 1H), 7.78 (d,

*J* = 7.9 Hz, 1H), 7.62 (d, *J* = 6.7 Hz, 1H), 7.50 – 7.36 (m, 5H), 7.30 (d, *J* = 7.9 Hz, 1H), 7.22 (d, *J*

= 7.6 Hz, 1H), 7.07 (dd, *J* = 14.3, 7.7 Hz, 3H), 6.88 (t, *J* = 7.0 Hz, 1H), 6.60 (s, 1H), 6.53 (d, *J*

= 8.0 Hz, 1H), 2.28 (s, 3H); <sup>13</sup>C NMR (101 MHz, DMSO-d<sub>6</sub>): δ 141.97, 138.70, 137.05, 136.35,

133.24, 130.19, 128.94, 128.56, 127.39, 126.36, 126.09, 125.62, 125.44, 125.14, 124.80, 124.63,

123.12, 121.32, 118.73, 118.54, 114.94, 111.56, 50.66, 20.93. HRMS-FAB: *m/z* [M + Na]<sup>+</sup> calcd

for C<sub>26</sub>H<sub>22</sub>N<sub>2</sub>O<sub>2</sub>SNa: 449.1402; found: 449.1307.

#### N-[Indol-3-yl-(2-Naphthyl)methyl]-4-methylbenzenesulfonamide (4p)

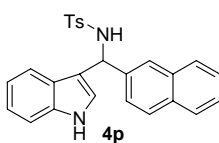

Primrose yellow solid; 90% yield, 78:22 er, [Daicel Chiralcel OD-H,

Hexanes / IPA = 75 / 25, flow rate: 1.0 mL·min<sup>-1</sup>, λ = 213.4 nm, t (major) =

13.919, t (minor) = 20.976]; [α]<sub>D</sub><sup>20</sup> = +14.6 (c 0.5, Acetone) <sup>1</sup>H NMR (400

MHz, DMSO-d<sub>6</sub>) δ 10.92 (s, 1H), 8.54 (d, *J* = 8.0 Hz, 1H), 7.90 – 7.64 (m, 4H), 7.28 – 7.54 (m,

7H), 7.12 – 6.96 (m, 3H), 6.88 (d, *J* = 7.6 Hz, 2H), 5.89 (d, *J* = 8.4 Hz, 1H), 2.11 (s, 3H); <sup>13</sup>C

NMR (101 MHz, DMSO-d<sub>6</sub>): δ 141.89, 138.87, 138.64, 136.40, 132.55, 131.99, 128.86, 127.69,

127.56, 127.37, 126.42, 125.98, 125.68, 125.61, 125.50, 125.46, 123.82, 121.29, 118.85, 118.61,

115.44, 111.50, 54.72, 20.74; ESI-MS: *m/z* [M + Na]<sup>+</sup> calcd for C<sub>26</sub>H<sub>22</sub>N<sub>2</sub>O<sub>2</sub>SNa: 449.1300; found:

449.1307.

#### N-[Indol-3-yl-(2-Thiophenyl)methyl]-4-methylbenzenesulfonamide (4q)



Primrose yellow solid; 85% yield, 81:19 er, [Daicel Chiralcel OD-H, Hexanes / IPA = 75 / 25,

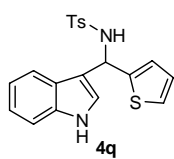

flow rate: 1.0 mL·min<sup>-1</sup>, λ = 210.5 nm, t (major) = 10.257, t (minor) = 17.196];

[α]<sub>D</sub><sup>20</sup> = +7.4 (c 0.215, Acetone); <sup>1</sup>H NMR (400 MHz, DMSO-d<sub>6</sub>) δ 10.91 (s, 1H), 8.62 (d, *J* = 8.4 Hz, 1H), 7.53 (d, *J* = 7.7 Hz, 2H), 7.31 (t, *J* = 7.2 Hz, 3H),

7.12 (d, *J* = 7.7 Hz, 2H), 7.04 (t, *J* = 7.2 Hz, 1H), 6.89 – 6.75 (m, 4H), 5.99 (d, *J* = 8.4 Hz, 1H),

2.28 (s, 3H); <sup>13</sup>C NMR (101 MHz, DMSO-d<sub>6</sub>): δ 151.16, 146.33, 146.14, 136.27, 129.03, 128.97,

126.47, 126.37, 125.15, 125.10, 125.05, 123.74, 121.22, 118.59, 111.45, 109.36, 50.15, 20.95;

ESI-MS: *m/z* [M + Na]<sup>+</sup> calcd for C<sub>20</sub>H<sub>18</sub>N<sub>2</sub>O<sub>2</sub>S<sub>2</sub>Na: 405.0702; found: 405.0714.

#### N-[5-Methylindol-3-yl-phenylmethyl]-4-methylbenzenesulfonamide (4r)

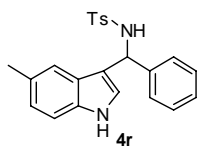

Colorless solid; 94% yield, 72:28 er, [Daicel Chiralcel OD-H, Hexanes / IPA

= 75 / 25, flow rate: 1.0 mL·min<sup>-1</sup>, λ = 254 nm, t (major) = 9.403, t (minor) =

28.043]; [α]<sub>D</sub><sup>20</sup> = +16.57 (c 1.0, Acetone); <sup>1</sup>H NMR (400 MHz, DMSO-d<sub>6</sub>): δ

10.75 (s, 1H), 8.43 (d, *J* = 8.1 Hz, 1H), 7.55 (d, *J* = 7.5 Hz, 2H), 7.29 (d, *J* = 6.4 Hz, 2H), 7.24 –

7.15 (m, 6H), 6.92 (s, 1H), 6.86 (d, *J* = 7.8 Hz, 1H), 6.67 (s, 1H), 5.68 (d, *J* = 8.0 Hz, 1H), 2.30 (s,

3H), 2.25 (s, 3H); <sup>13</sup>C NMR (101 MHz, DMSO-d<sub>6</sub>): δ 142.17, 141.99, 138.85, 134.71, 129.10,

127.94, 127.07, 126.99, 126.52, 125.78, 124.03, 122.88, 118.29, 115.16, 111.19, 104.65, 54.29,

21.29, 21.00; ESI-MS: *m/z* [M + Na]<sup>+</sup> calcd for C<sub>23</sub>H<sub>22</sub>N<sub>2</sub>O<sub>2</sub>SNa: 413.1300; found: 413.1303.

#### N-[5-Bromoindol-3-yl-phenylmethyl]-4-methylbenzenesulfonamide (4s)

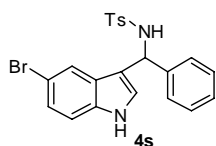

Colorless solid; 98% yield, 70:30 er, [Daicel Chiralcel OD-H, Hexanes / IPA

= 75 / 25, flow rate: 1.0 mL·min<sup>-1</sup>, λ = 254 nm, t (major) = 7.780, t (minor) =

21.050]; [α]<sub>D</sub><sup>20</sup> = +17.37 (c 1.0, Acetone); <sup>1</sup>H NMR (400 MHz, DMSO-d<sub>6</sub>) δ

11.10 (s, 1H), 8.52 (d, *J* = 8.4 Hz, 1H), 7.52 (d, *J* = 7.6 Hz, 2H), 7.37 (s, 1H), 7.28 (t, *J* = 7.4 Hz,

3H), 7.24 – 7.11 (m, 5H), 6.81 (s, 1H), 5.71 (d, *J* = 8.4 Hz, 1H), 2.28 (s, 3H); <sup>13</sup>C NMR (101 MHz,

DMSO-d<sub>6</sub>): δ 142.08, 141.58, 139.83, 138.58, 135.10, 129.08, 128.03, 127.07, 126.42, 125.68,

123.77, 121.19, 115.43, 113.56, 113.53, 111.39, 104.65, 54.02, 21.06; ESI-MS: *m/z* [M + Na]<sup>+</sup>

calcd for C<sub>22</sub>H<sub>19</sub>BrN<sub>2</sub>O<sub>2</sub>SNa: 477.0248, 479.0228; found: 477.0246, 479.0225.

#### N-[7-Methylindol-3-yl-phenylmethyl]-4-methylbenzenesulfonamide (4t)

Colorless solid; 90% yield, 85:15 er, [Daicel Chiralcel OD-H, Hexanes / IPA = 75 / 25, flow rate:

1.0 mL·min<sup>-1</sup>, λ = 254 nm, t (major) = 24.772, t (minor) = 29.161]; [α]<sub>D</sub><sup>20</sup> = +17.63 (c 1.0, Acetone);

<sup>1</sup>H NMR (400 MHz, DMSO-d<sub>6</sub>) δ 10.86 (s, 1H), 8.48 (d, *J* = 8.7 Hz, 1H), 7.50 (d, *J* = 7.8 Hz, 2H),

7.26 (d,  $J = 6.8$  Hz, 2H), 7.20 – 7.14 (m, 2H), 7.12 (d,  $J = 7.8$  Hz, 3H), 6.85 – 6.75 (m, 3H), 5.72

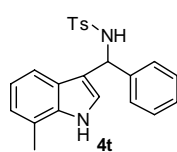

(d,  $J = 8.7$  Hz, 1H), 2.39 (s, 3H), 2.27 (s, 3H);  $^{13}\text{C}$  NMR (101 MHz, DMSO- $d_6$ ):  $\delta$  141.88, 138.83, 135.89, 128.98, 127.93, 127.11, 126.68, 126.41, 125.15, 123.36, 121.73, 120.52, 118.82, 116.58, 116.15, 104.65, 54.59, 20.95,

16.76; ESI-MS:  $m/z$   $[\text{M} + \text{Na}]^+$  calcd for  $\text{C}_{23}\text{H}_{22}\text{N}_2\text{O}_2\text{SNa}$ : 413.1300; found: 413.1302.

#### N-[7-Methylindol-3-yl-(2-chlorophenyl)methyl]-4-methylbenzenesulfonamide (4u)

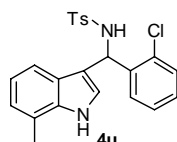

Colorless solid; 91% yield, 87:13 er, [Daicel Chiralcel OD-H, Hexanes / IPA = 75 / 25, flow rate: 1.0 mL·min $^{-1}$ ,  $\lambda = 254$  nm,  $t$  (major) = 9.185,  $t$  (minor) = 13.311];  $[\alpha]_D^{20} = +54.6$  (c 0.5, Acetone);  $^1\text{H}$  NMR (400 MHz, DMSO- $d_6$ )  $\delta$

11.19 (s, 1H), 8.64 (d,  $J = 6.4$  Hz, 1H), 7.65 (s, 1H), 7.58 (d,  $J = 6.0$  Hz, 2H), 7.15-7.33 (m, 7H), 6.58 (s, 1H), 6.05 (d,  $J = 6.3$  Hz, 1H), 5.76 (s, 1H), 3.42 (s, 3H), 2.33 (s, 3H);  $^{13}\text{C}$  NMR (101 MHz, DMSO- $d_6$ ):  $\delta$  142.59, 138.82, 137.93, 135.10, 131.47, 129.40, 129.00, 128.71, 128.53, 127.47, 127.16, 126.44, 126.09, 124.07, 120.51, 113.80, 113.55, 111.68, 54.99, 50.31, 21.18; ESI-MS:  $m/z$   $[\text{M} + \text{Na}]^+$  calcd for  $\text{C}_{23}\text{H}_{21}\text{ClN}_2\text{O}_2\text{SNa}$ : 447.0910; found: 447.0113.

#### N-[Indol-3-yl-phenylmethyl]-benzenesulfonamide (4v)

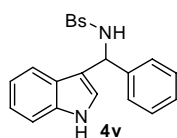

Colorless solid; 87% yield, 85:15 er, [Daicel Chiralcel OD-H, Hexanes / IPA = 75 / 25, flow rate: 1.0 mL·min $^{-1}$ ,  $\lambda = 254$  nm,  $t$  (major) = 11.234,  $t$  (minor) = 19.982];  $[\alpha]_D^{20} = +12.5$  (c 0.5, Acetone);  $^1\text{H}$  NMR (400 MHz, DMSO- $d_6$ )  $\delta$

10.93 (s, 1H), 8.18 (s, 1H), 8.06 (d,  $J = 8.0$  Hz, 1H), 7.83 (d,  $J = 7.5$  Hz, 1H), 7.57 (t,  $J = 7.9$  Hz, 1H), 7.38 (d,  $J = 8.1$  Hz, 2H), 7.31 (d,  $J = 7.9$  Hz, 2H), 7.06 (t,  $J = 7.4$  Hz, 2H), 6.93 – 6.86 (m, 4H), 6.07 (s, 1H);  $^{13}\text{C}$  NMR (101 MHz, DMSO- $d_6$ ):  $\delta$  147.83, 147.42, 136.65, 135.17, 129.62, 127.08, 126.39, 125.35, 123.92, 121.17, 119.25, 118.97, 118.47, 116.99, 111.65, 56.55; ESI-MS:  $m/z$   $[\text{M} + \text{Na}]^+$  calcd for  $\text{C}_{21}\text{H}_{18}\text{N}_2\text{O}_2\text{SNa}$ : 385.0987; found: 385.0968.

**Table 4 Investigating the effect of the concentration:**

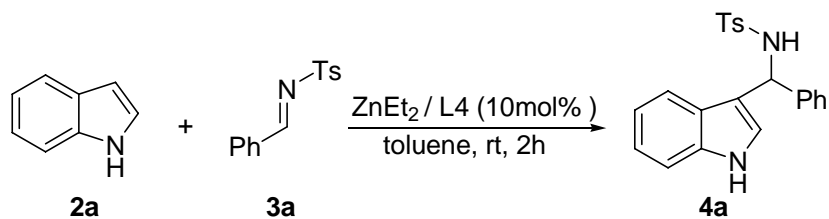

| Entry <sup>a</sup> | Toluene (mL) | Yield (%) <sup>b</sup> | er (%) <sup>c</sup> |
|--------------------|--------------|------------------------|---------------------|
| 1                  | 0.5          | 91                     | 79:21               |
| 2                  | 1            | 93                     | 76:24               |
| 3                  | 1.5          | 94                     | 92:8                |
| 4                  | 2            | 94                     | 80:20               |

<sup>a</sup>The reactions were performed with 5 equiv of **2a**, in toluene under N<sub>2</sub> at the room temperature for two hours (ZnEt<sub>2</sub>, 1.0 M in toluene). <sup>b</sup>Isolated yields. <sup>c</sup>The enantiomeric ratio was determined by chiral HPLC analysis of the corresponding products on a chiralcel OD-H column.

#### References:

1. B. E. Love, P. S. Raje, T. C. II Williams, *Synlett*, 1994, 493-494.
2. F. Chemla, V. Hebbe, J. -F. Normant, *Synthesis*, 2000, **1**, 75–77.
3. B. M. Trost, V. S. C. Yeh, *Org. Lett.*, 2002, **4**, 3513–3516.

$^1\text{H}$  and  $^{13}\text{C}$  NMR spectra for 4a-v:

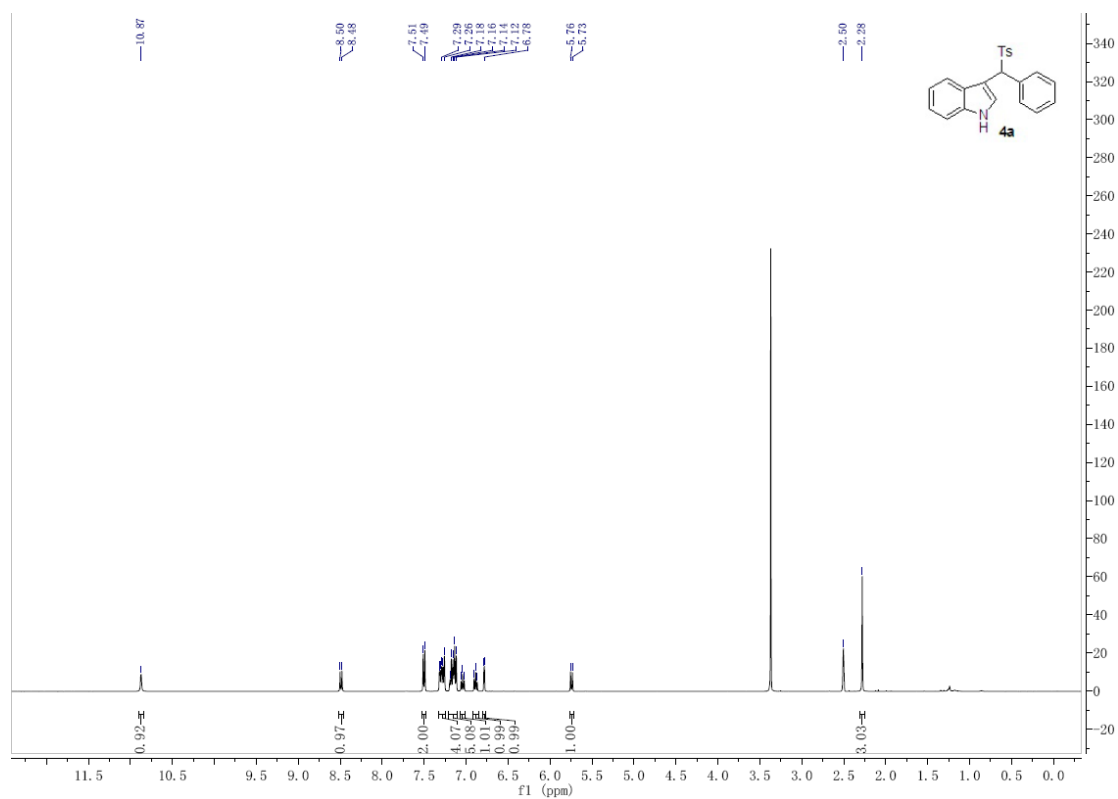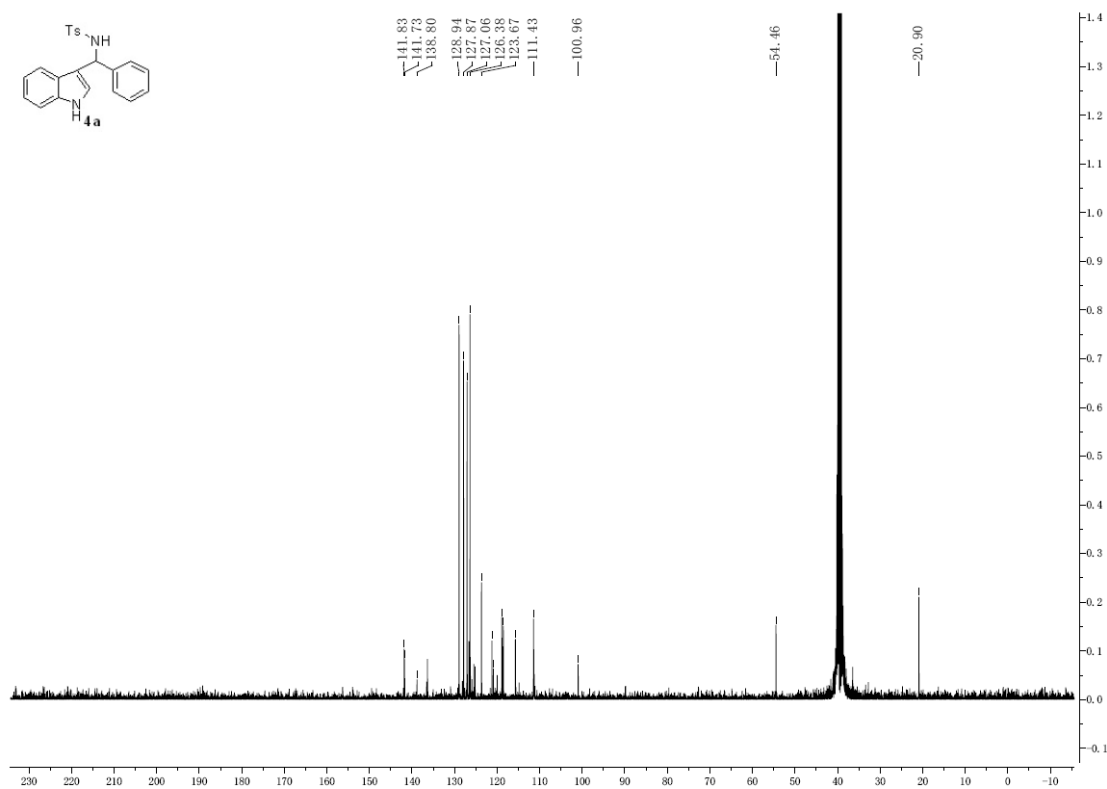

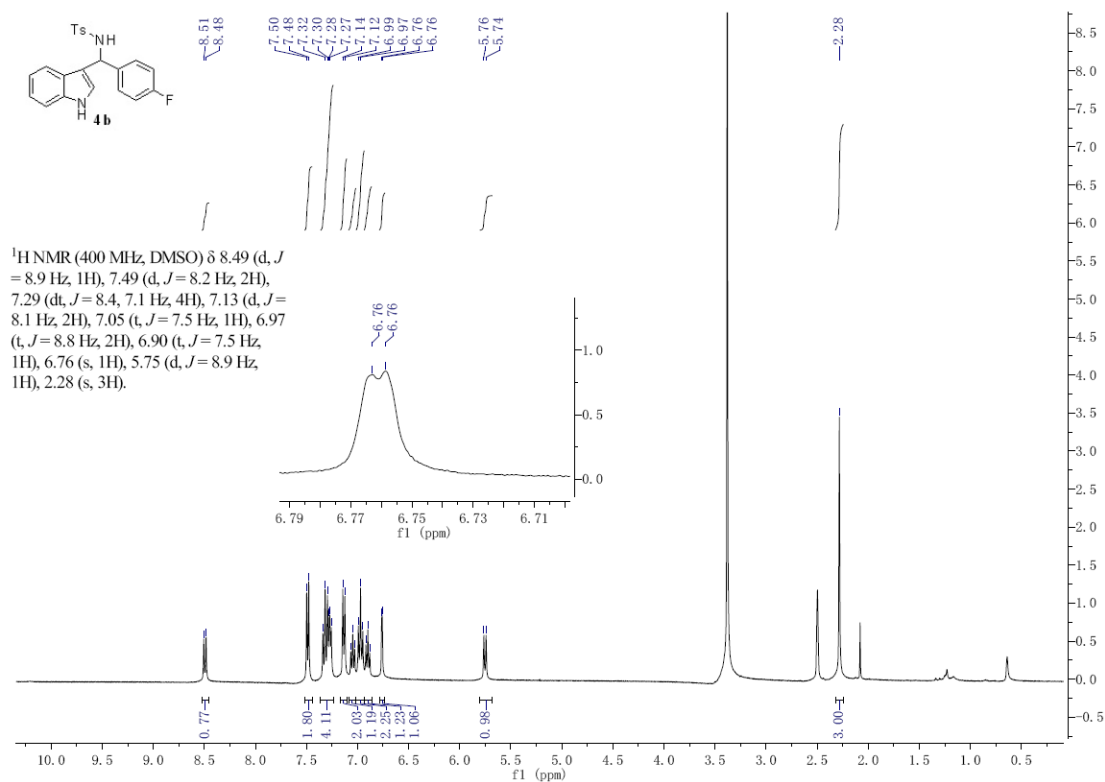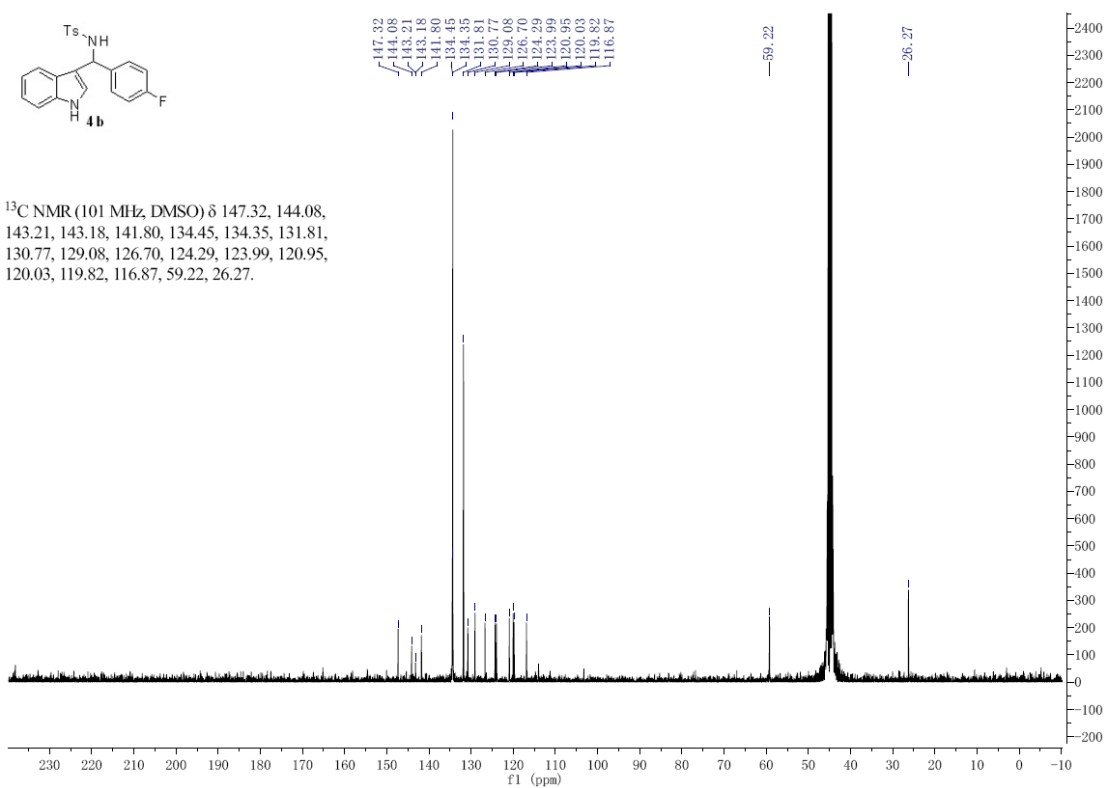

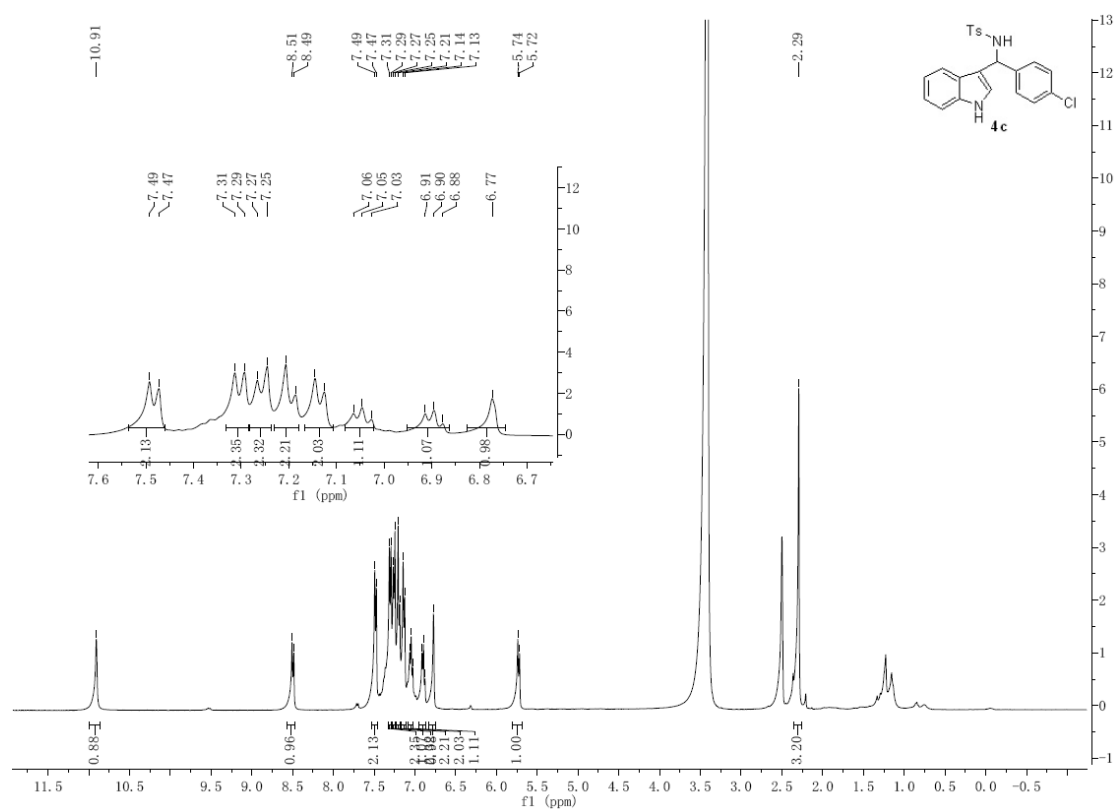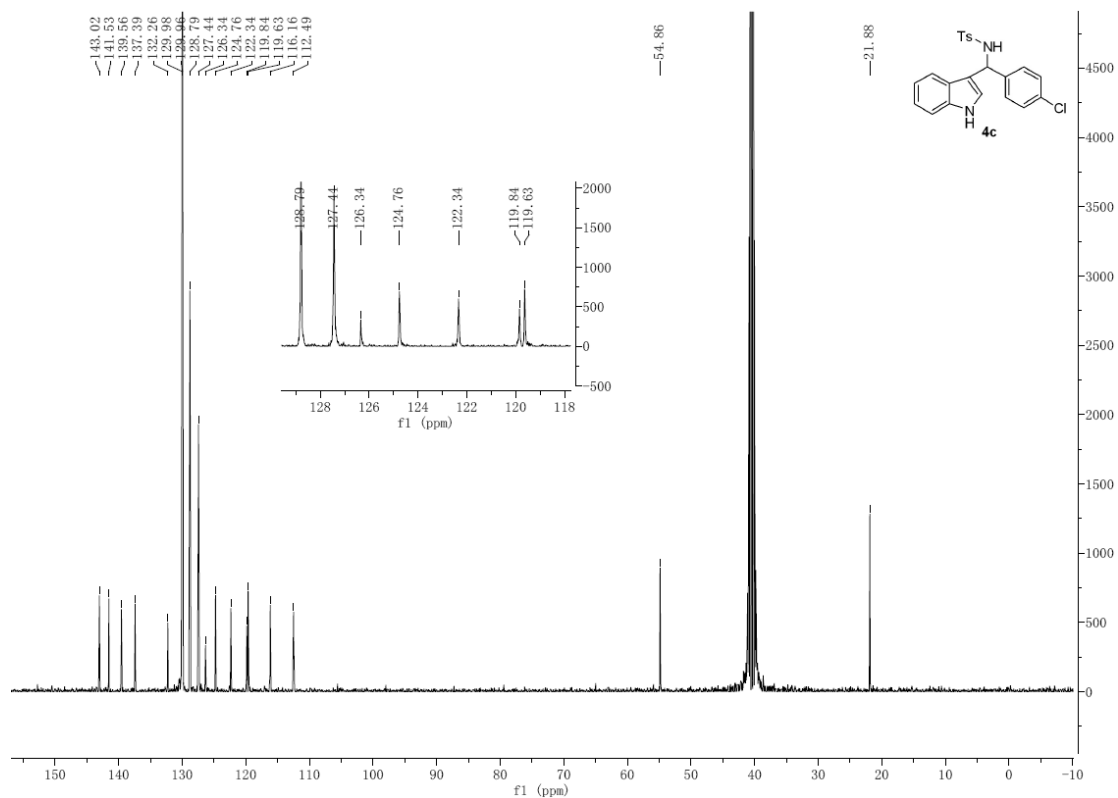

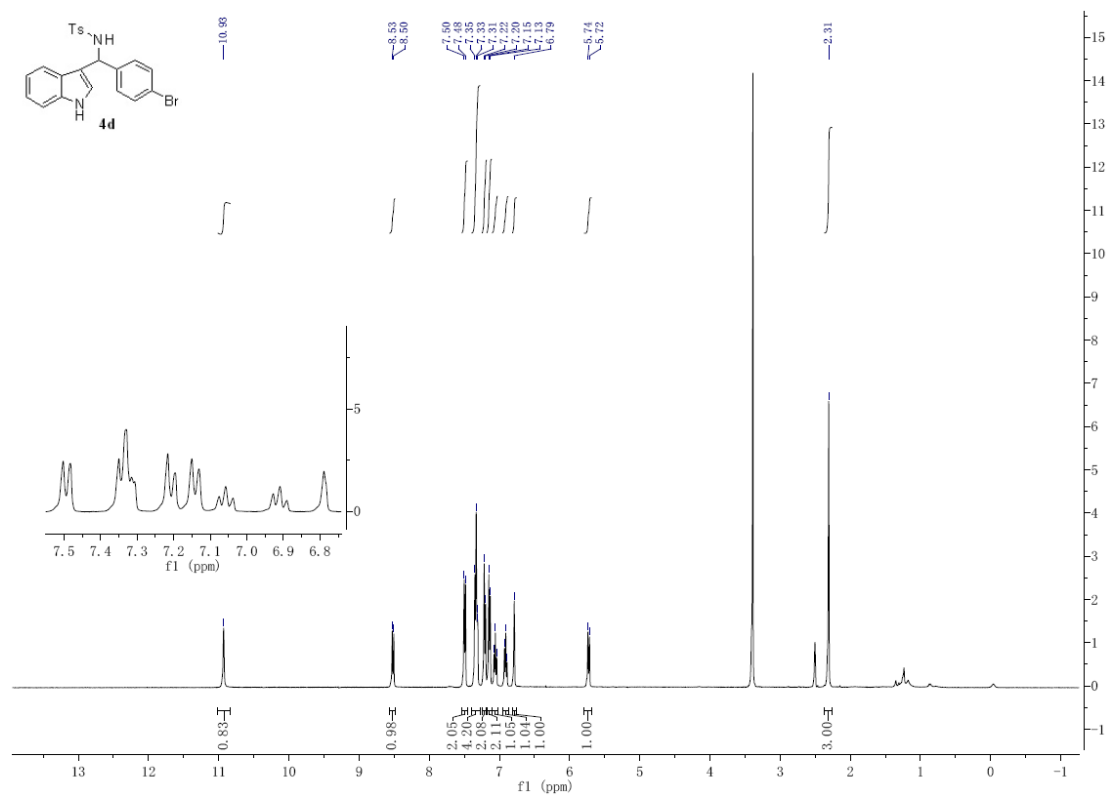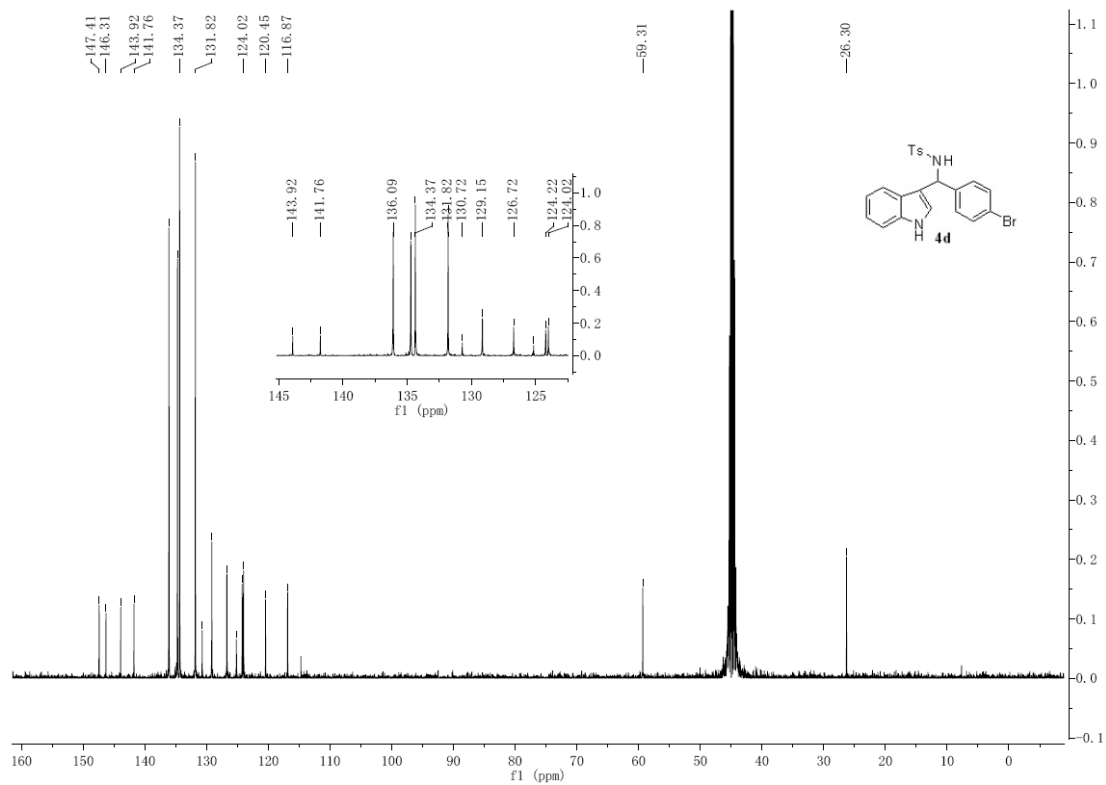

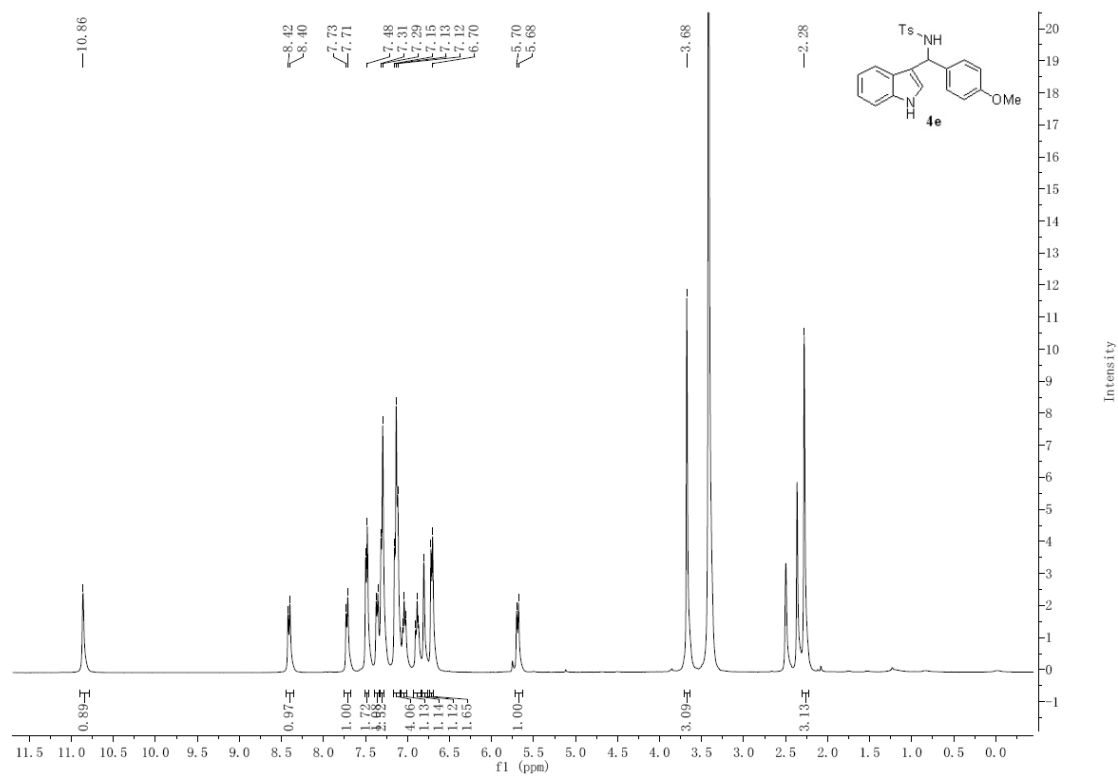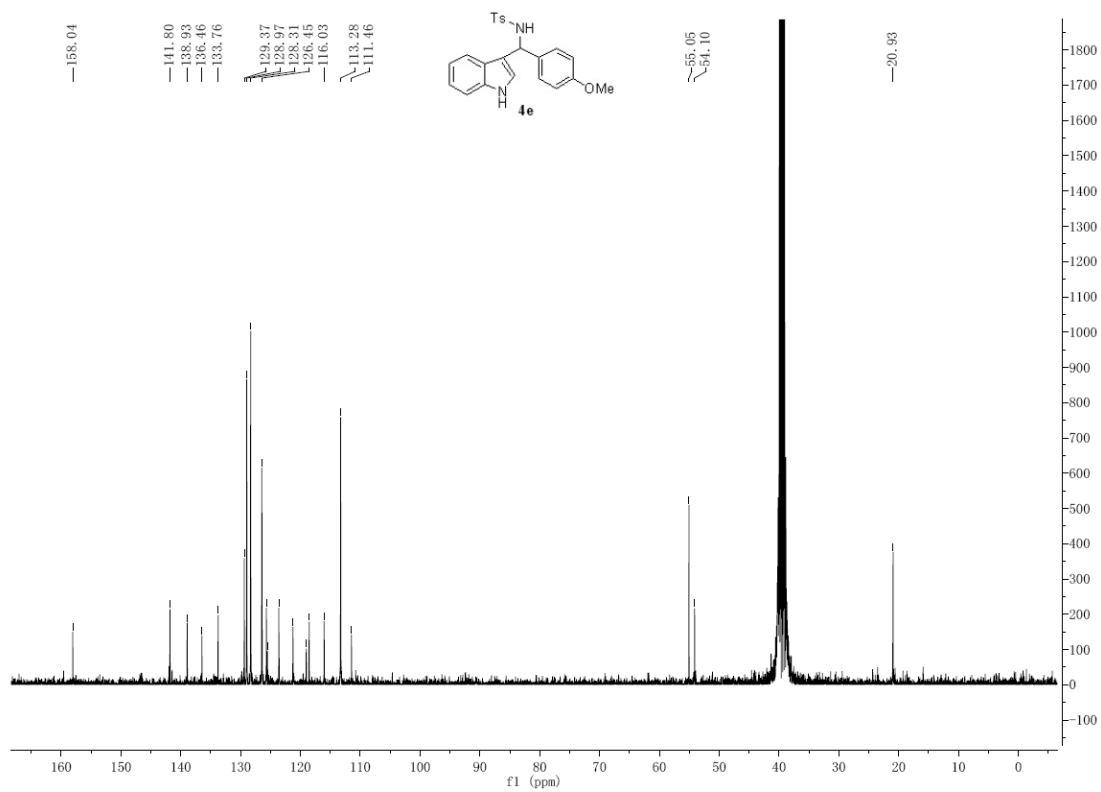



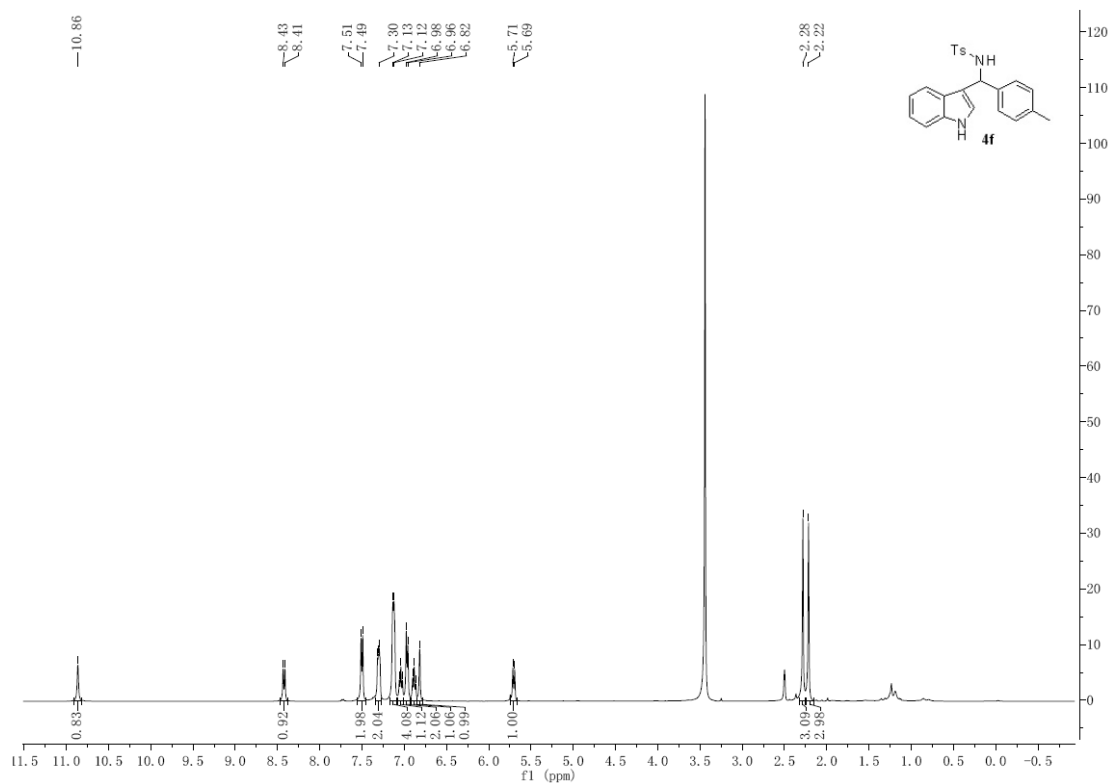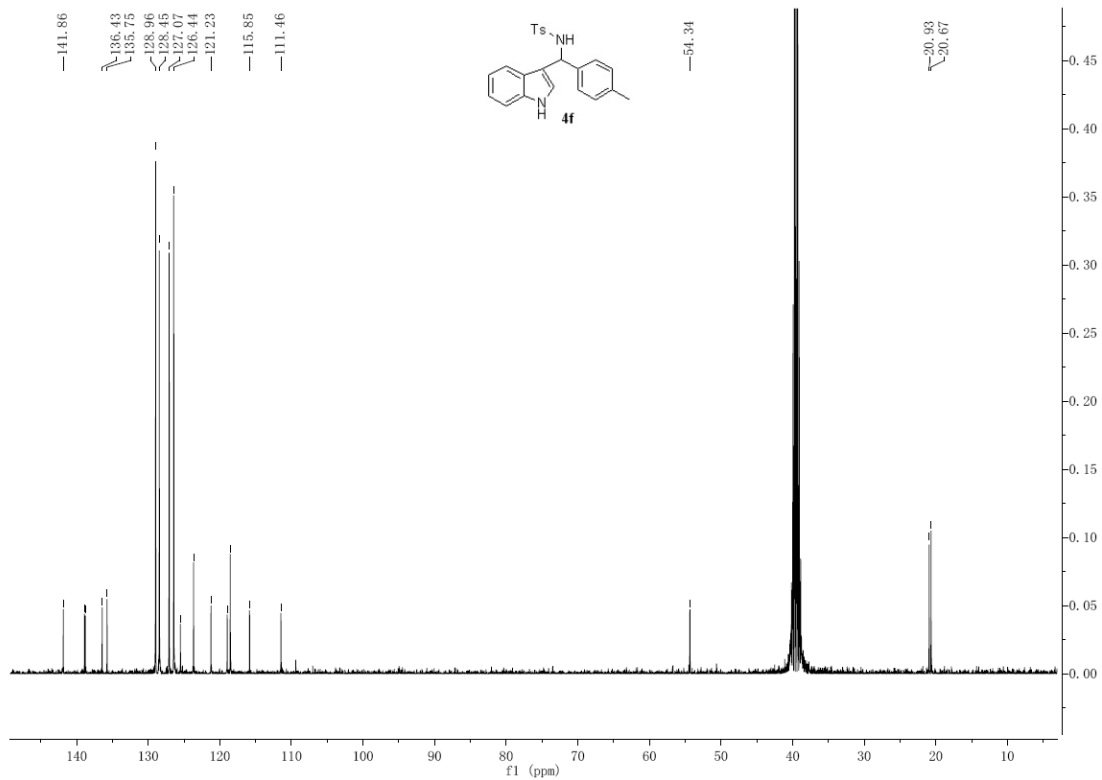

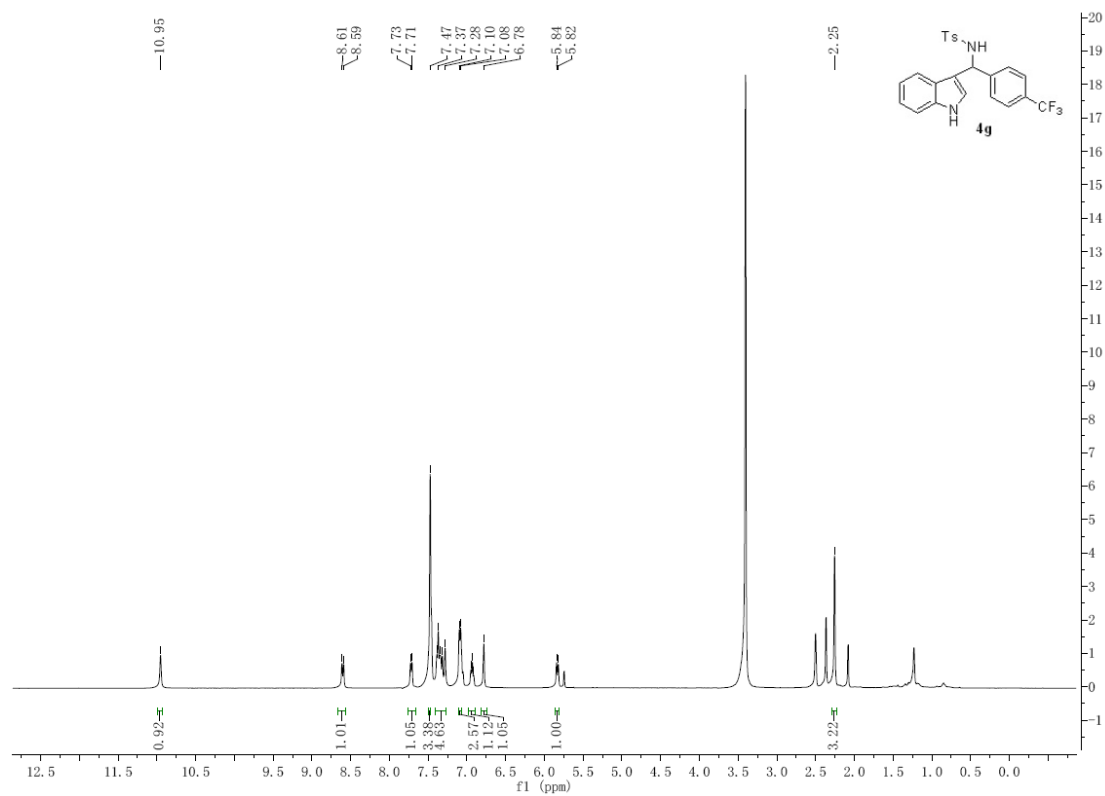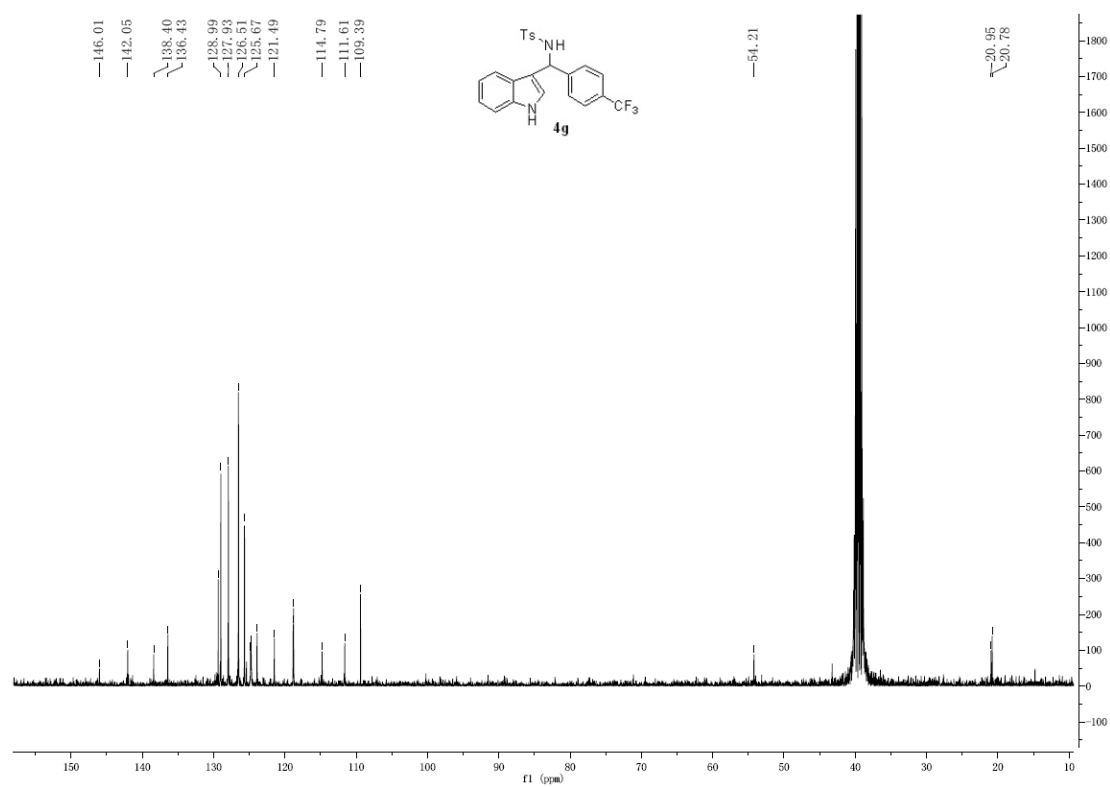

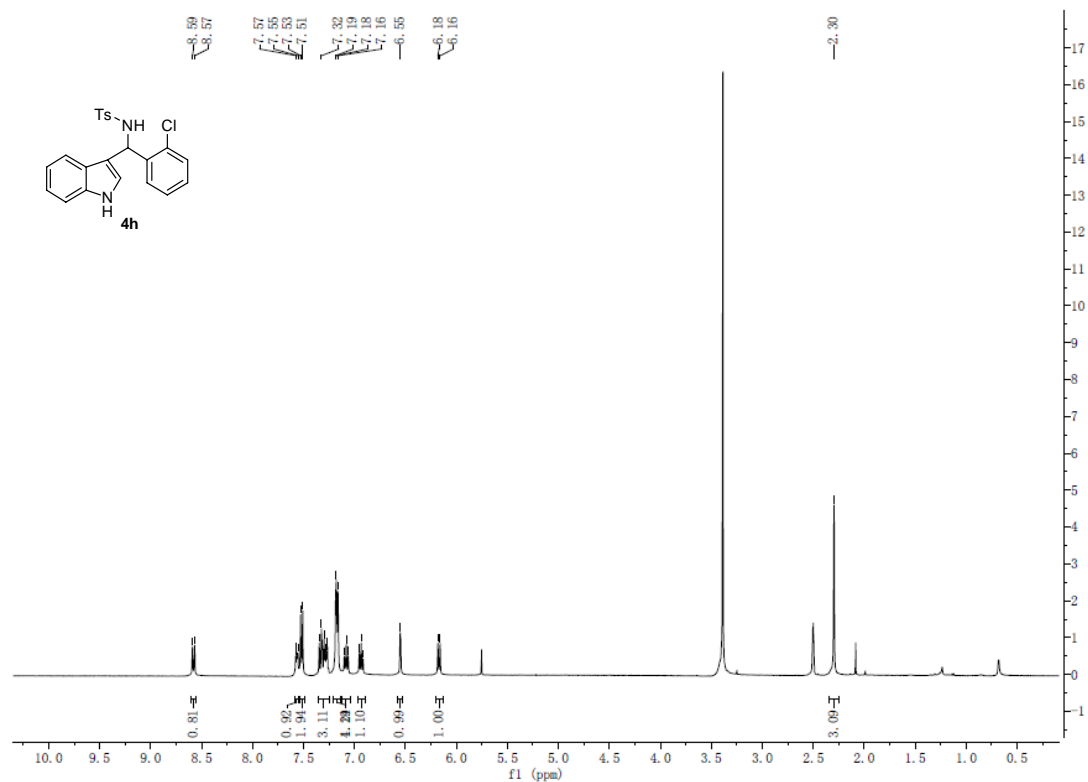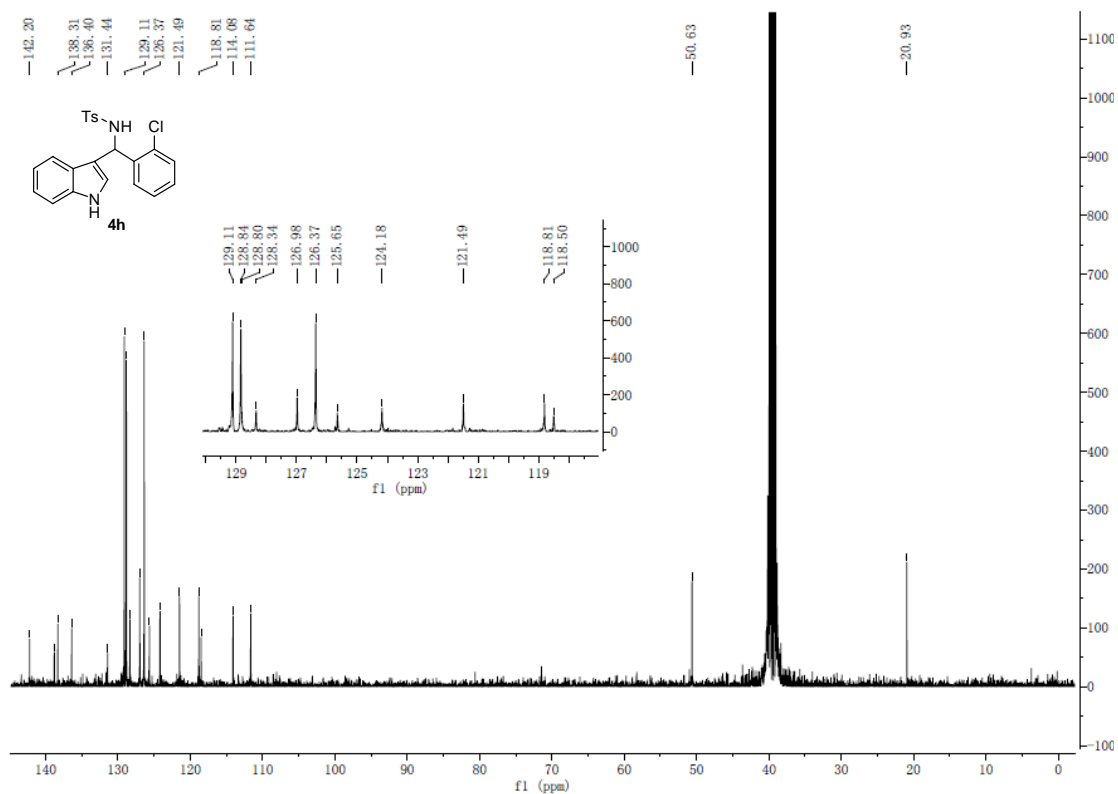

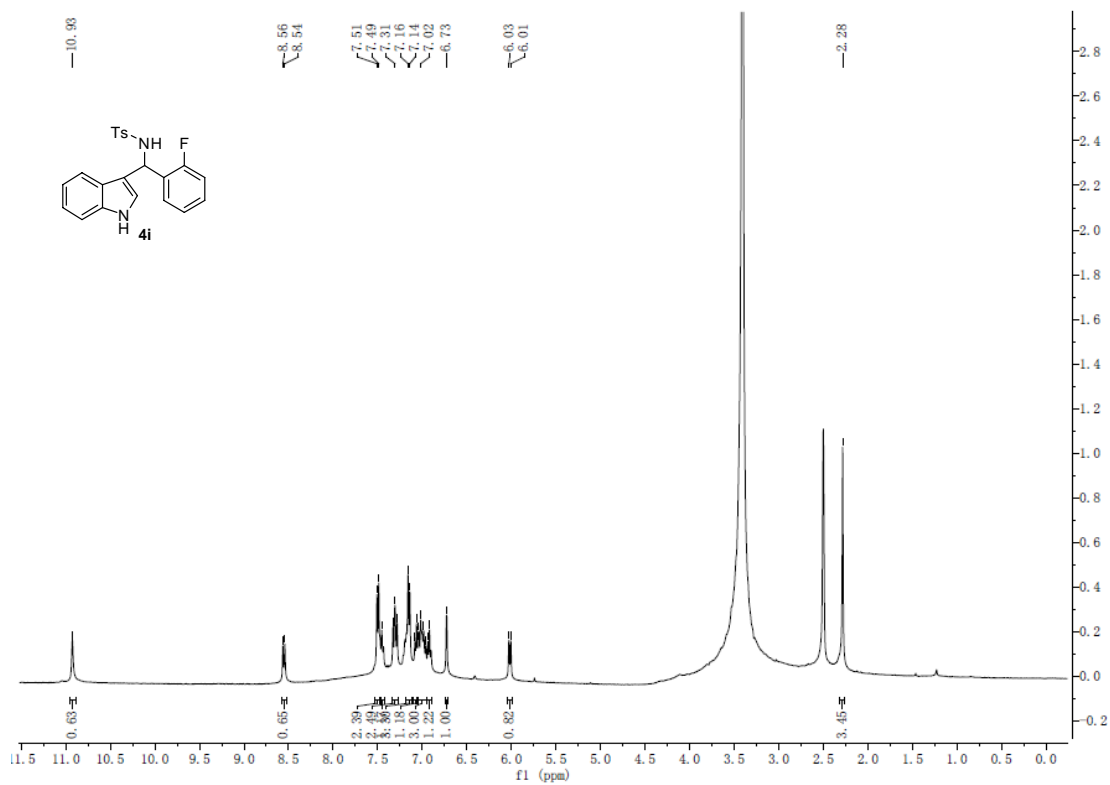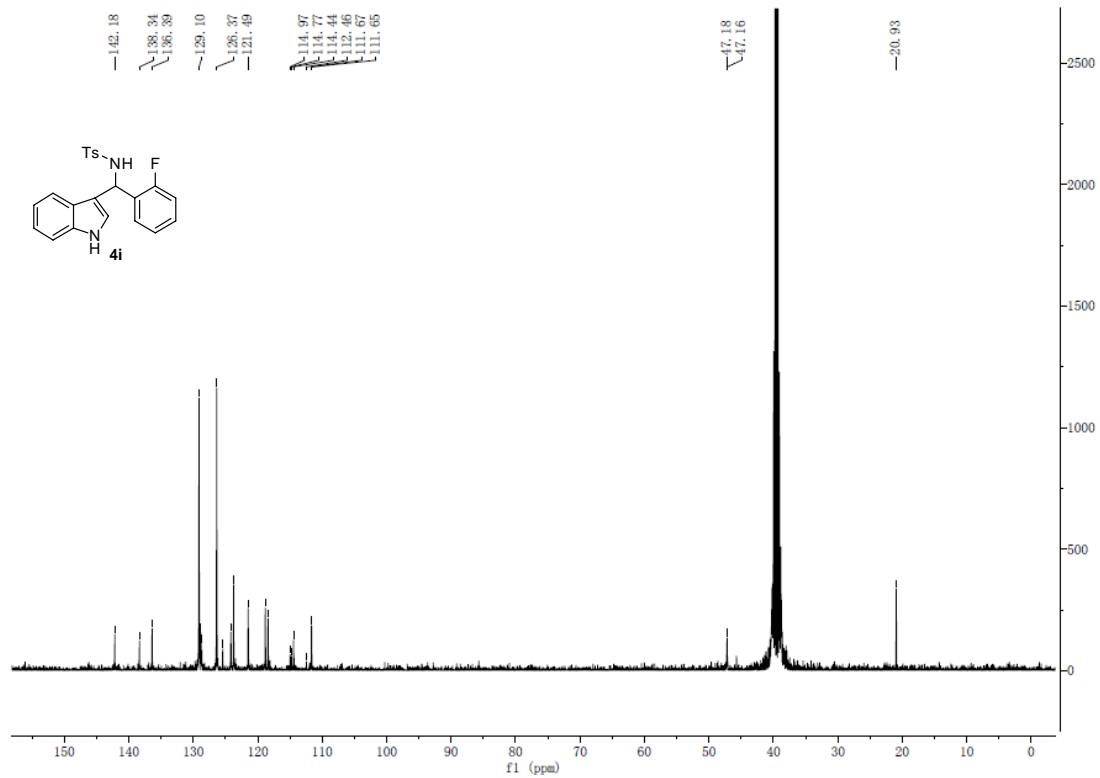

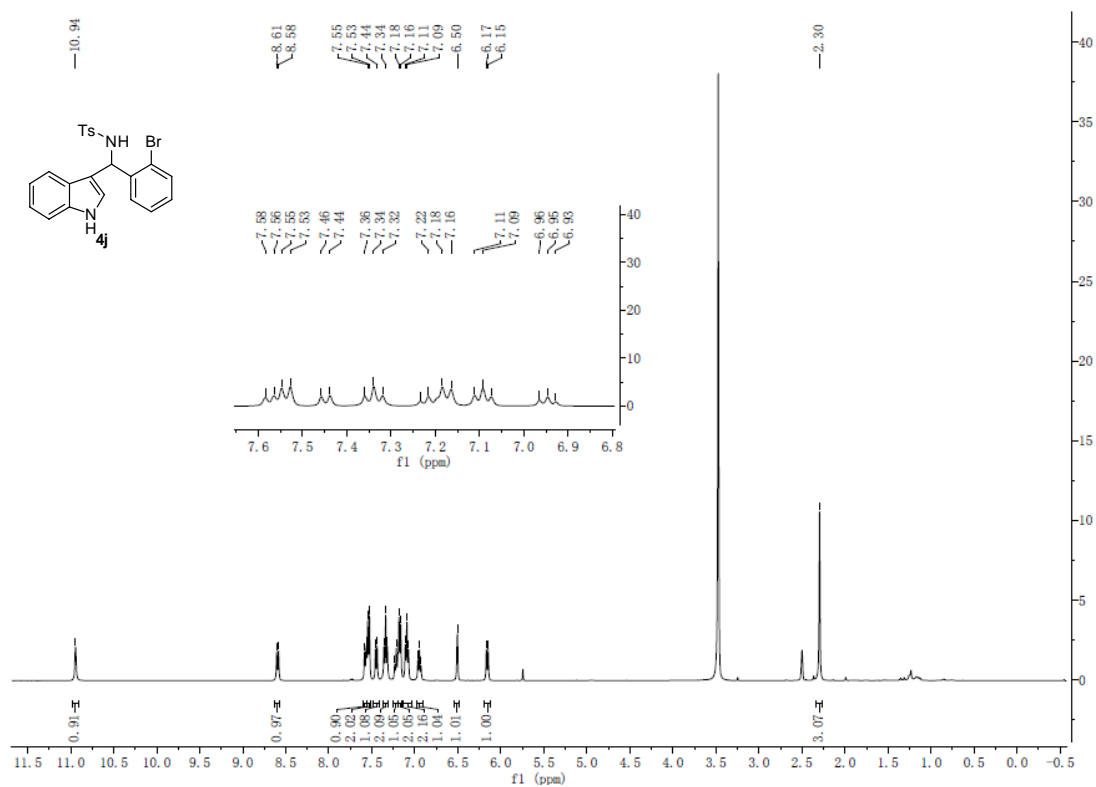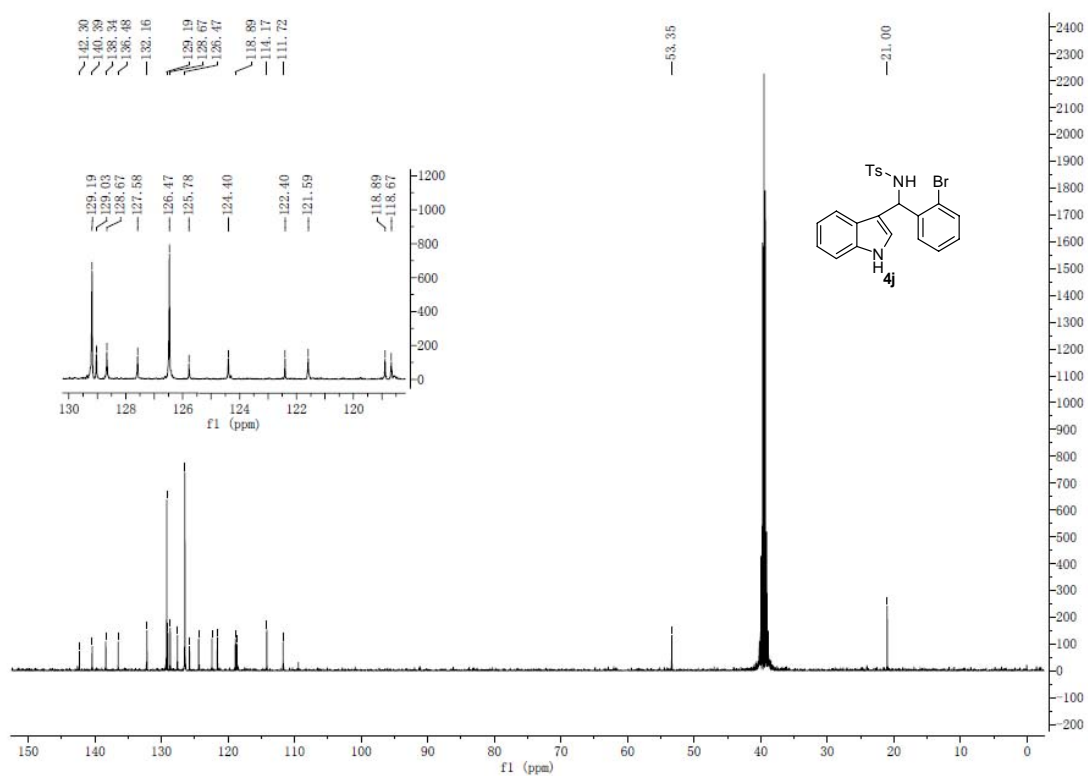

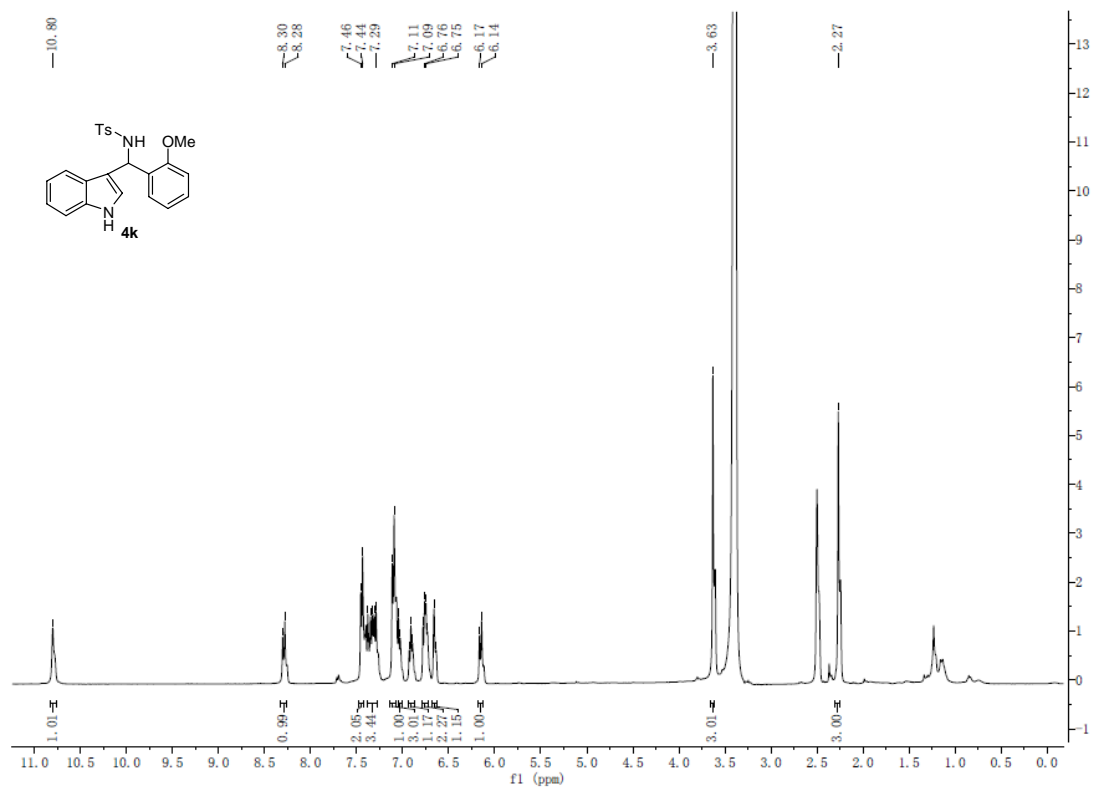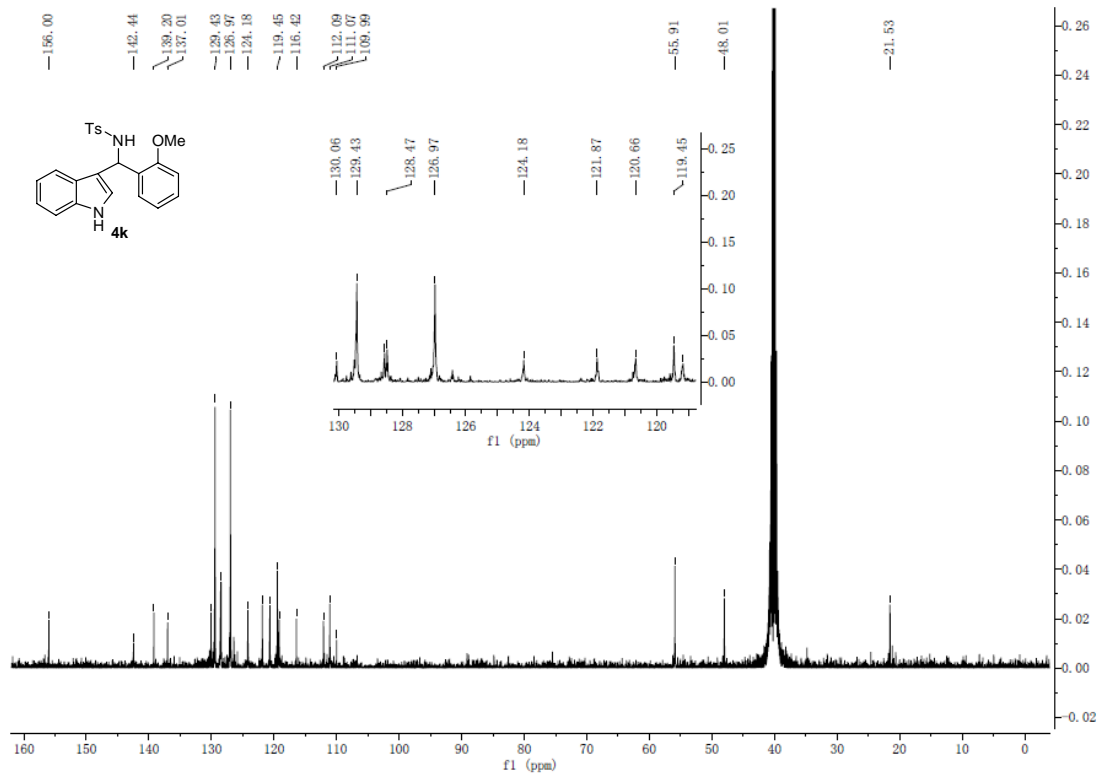

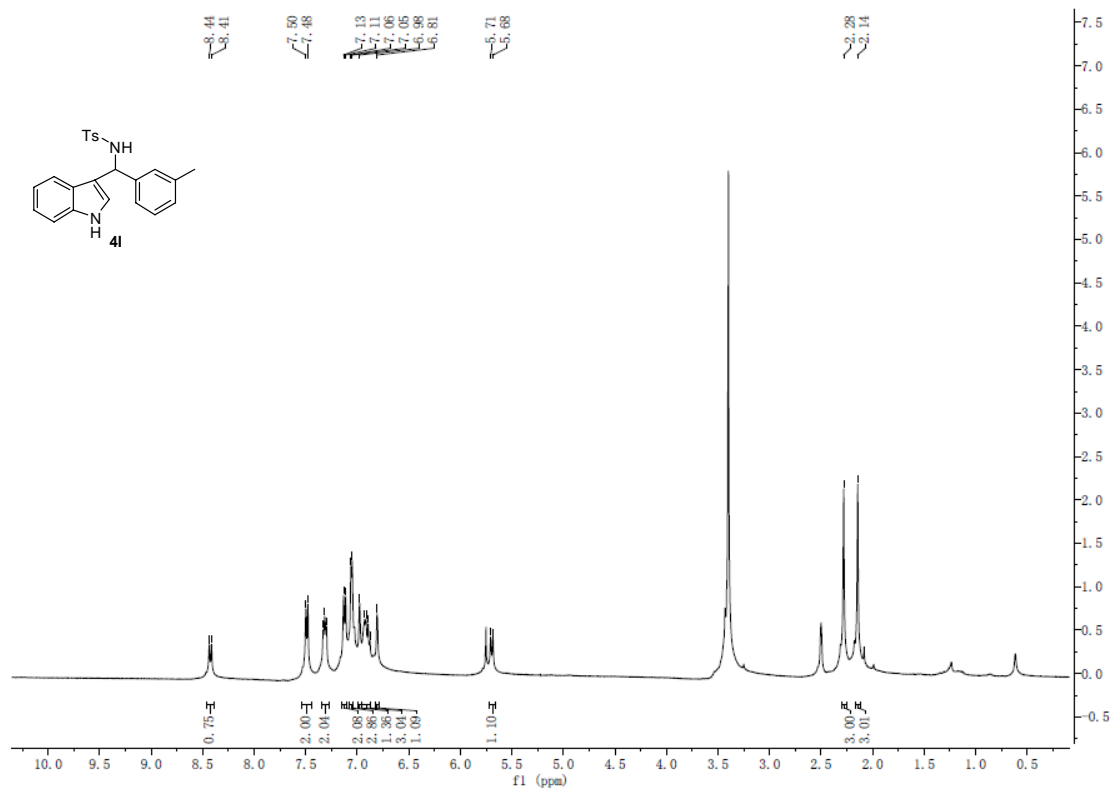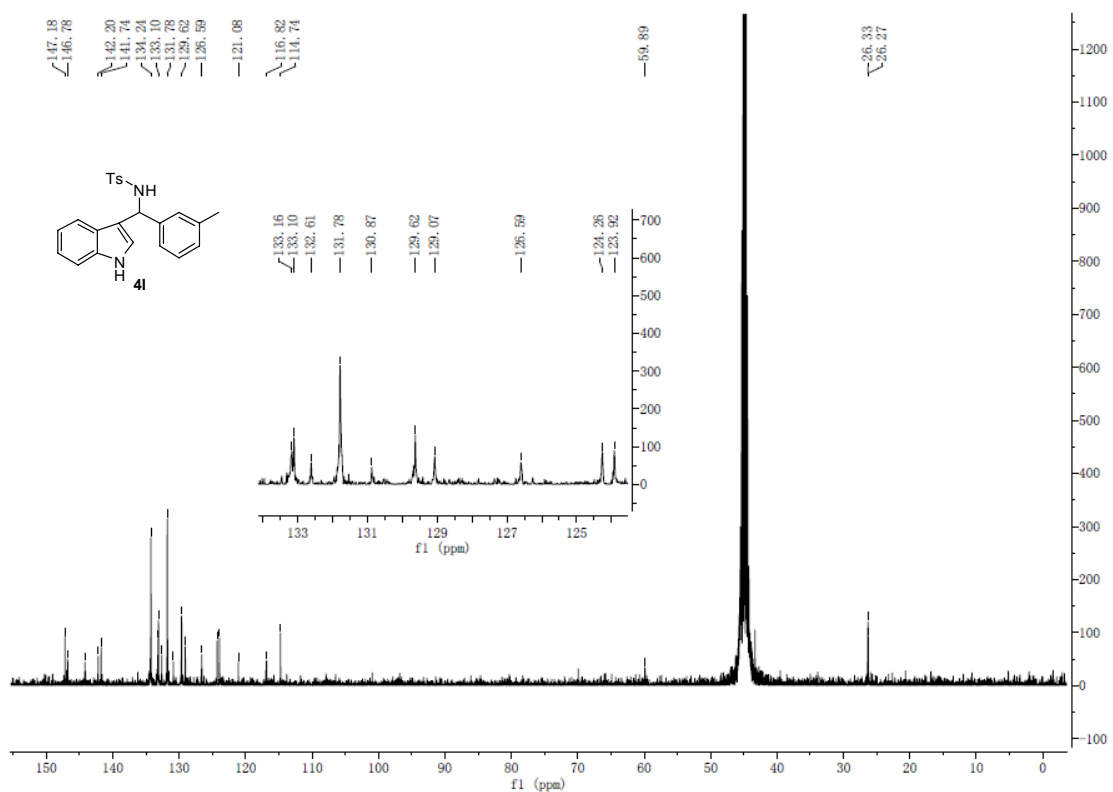

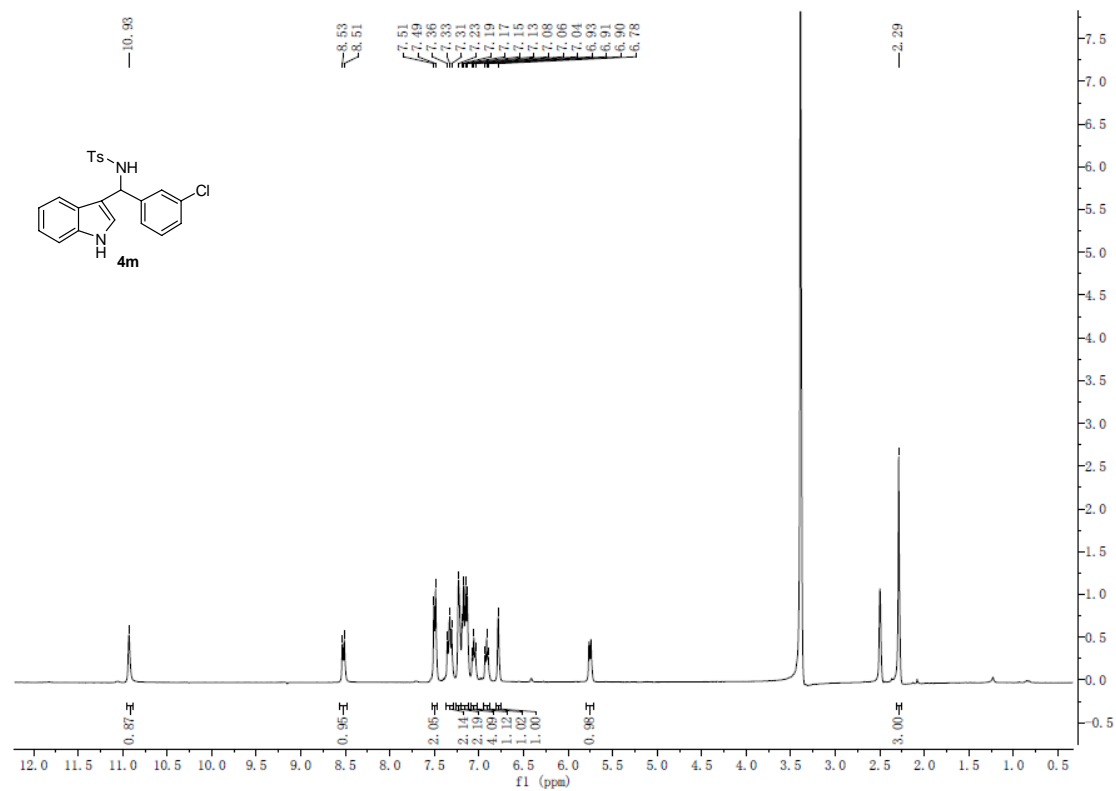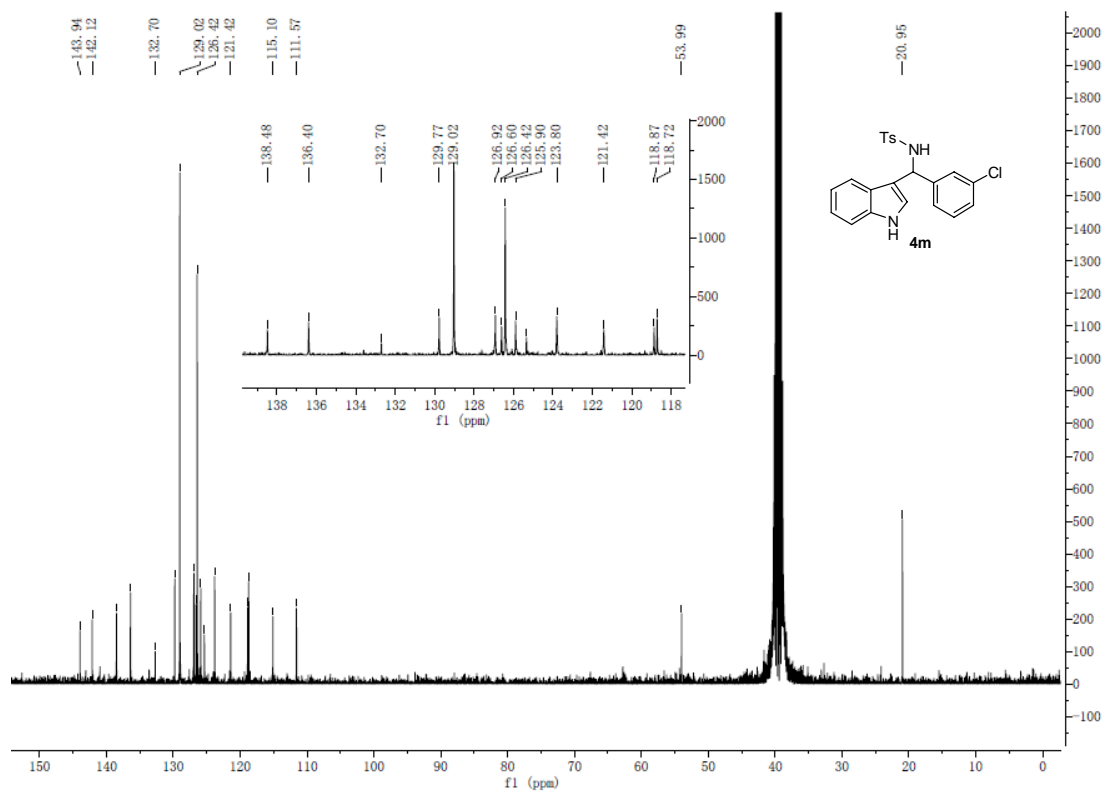



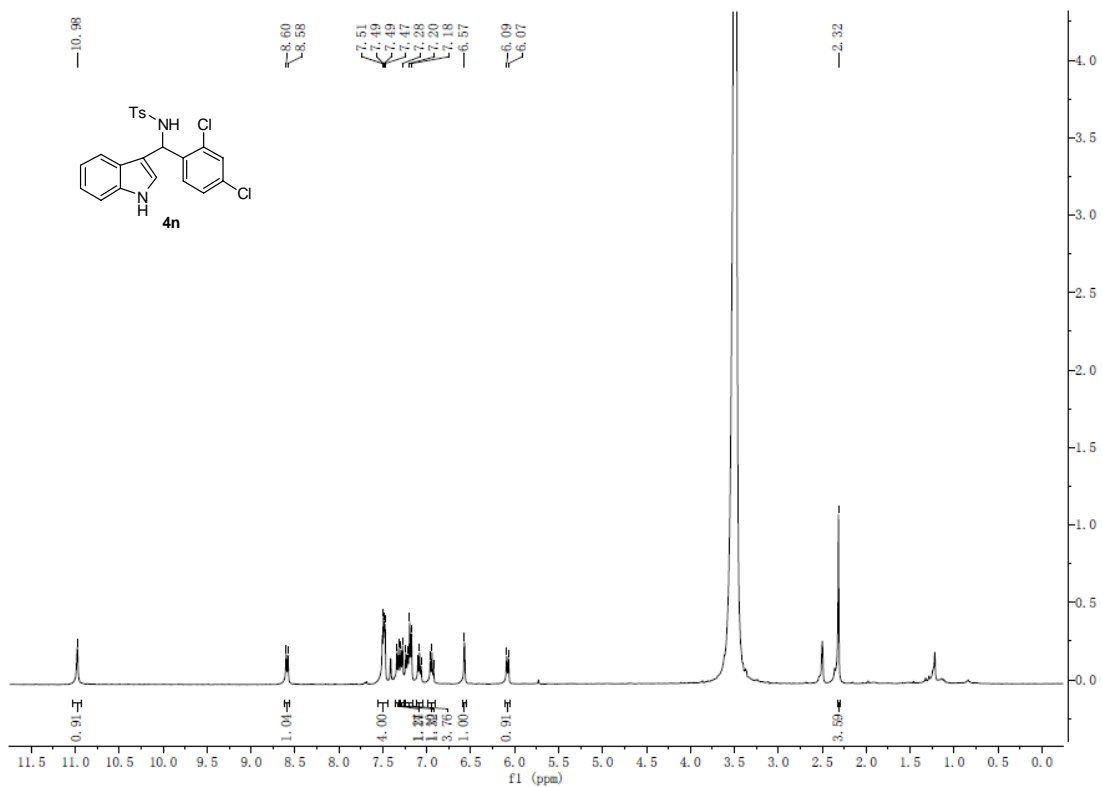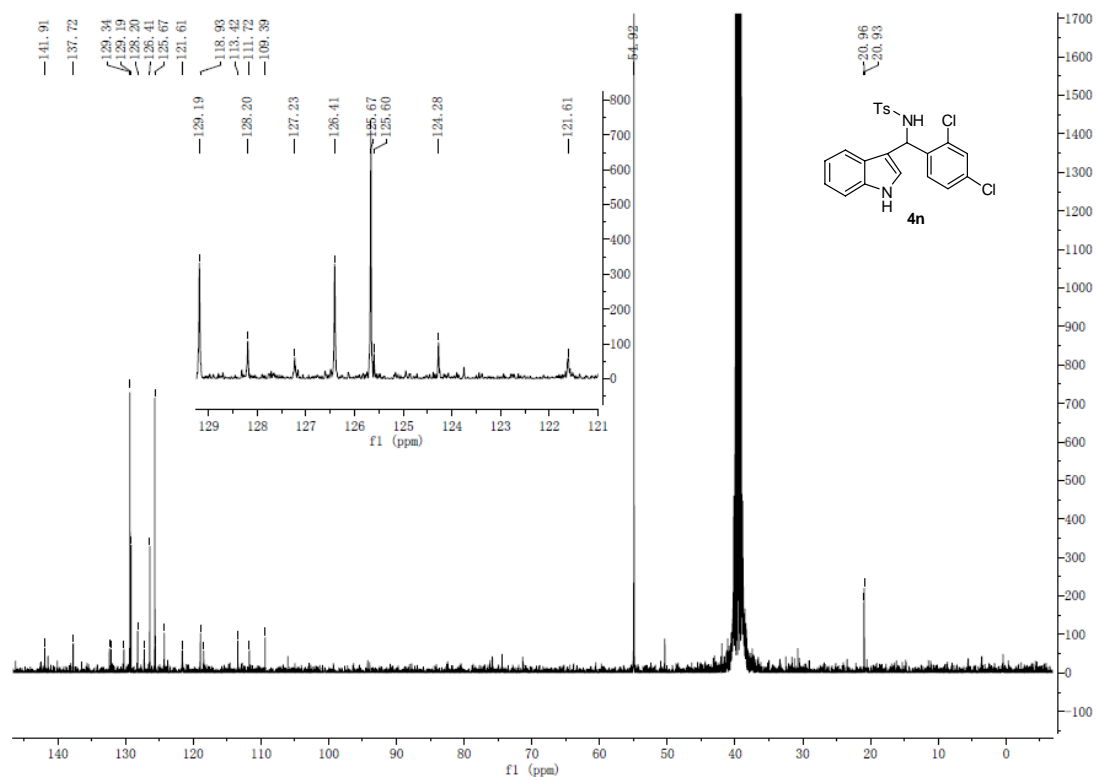

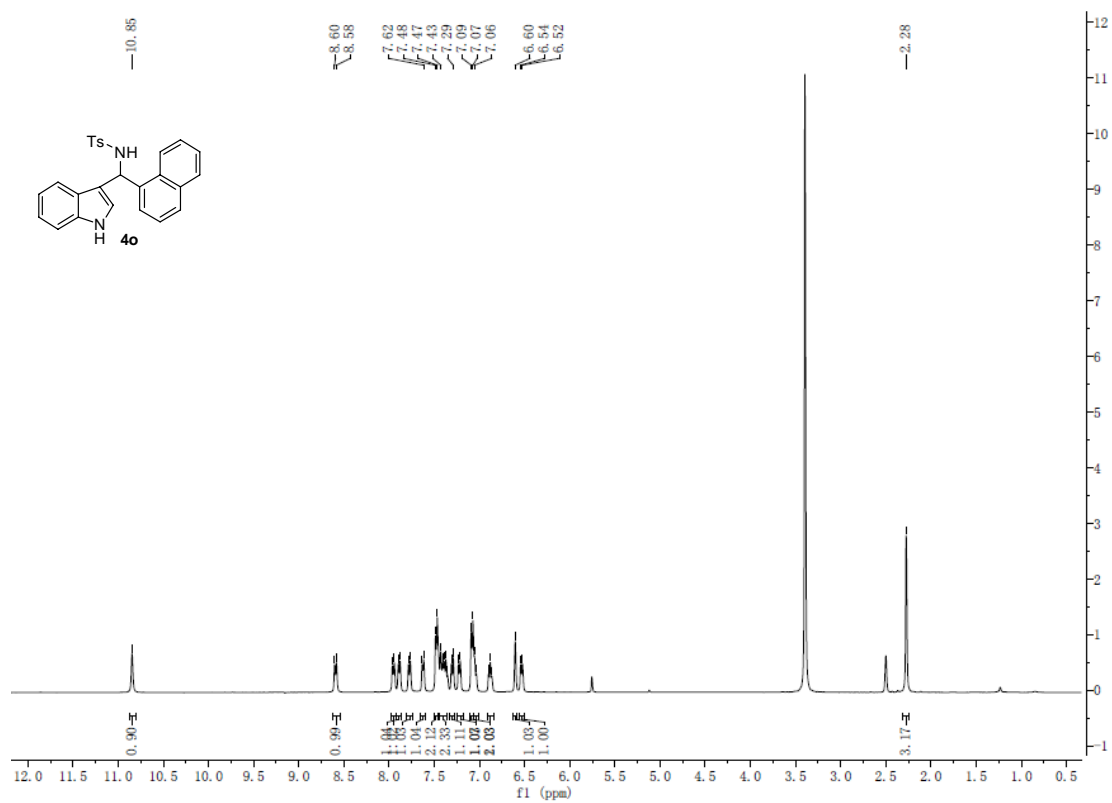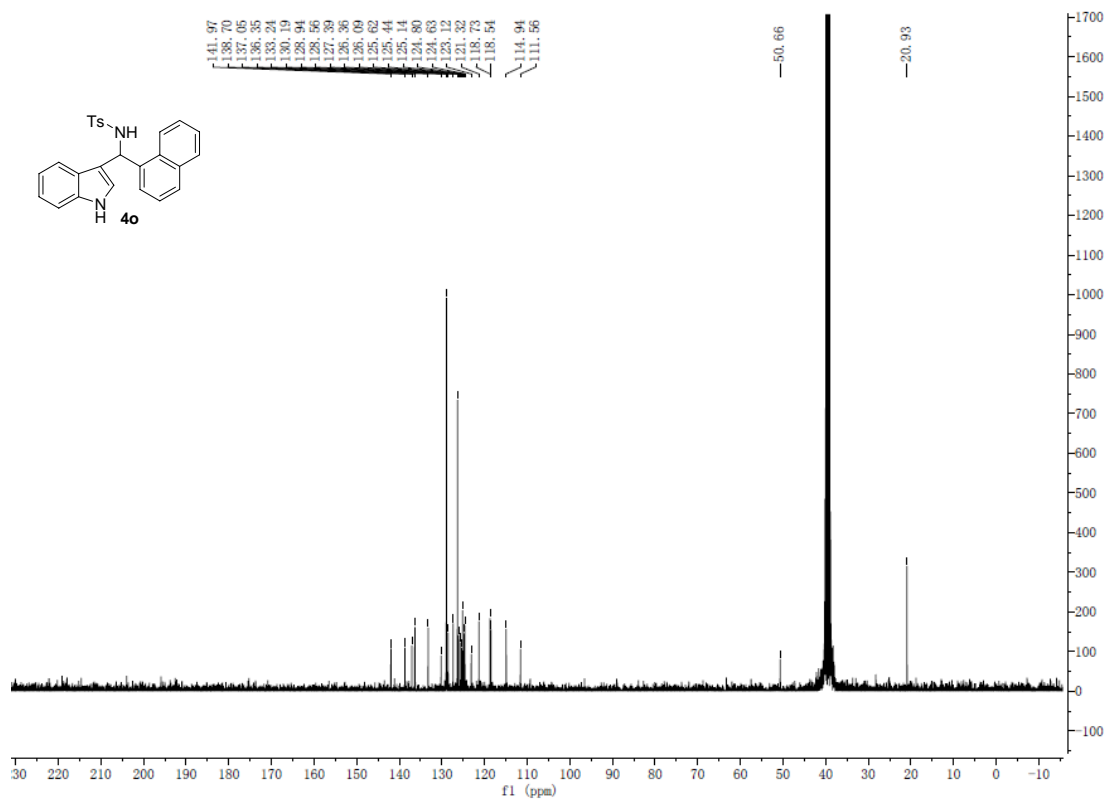

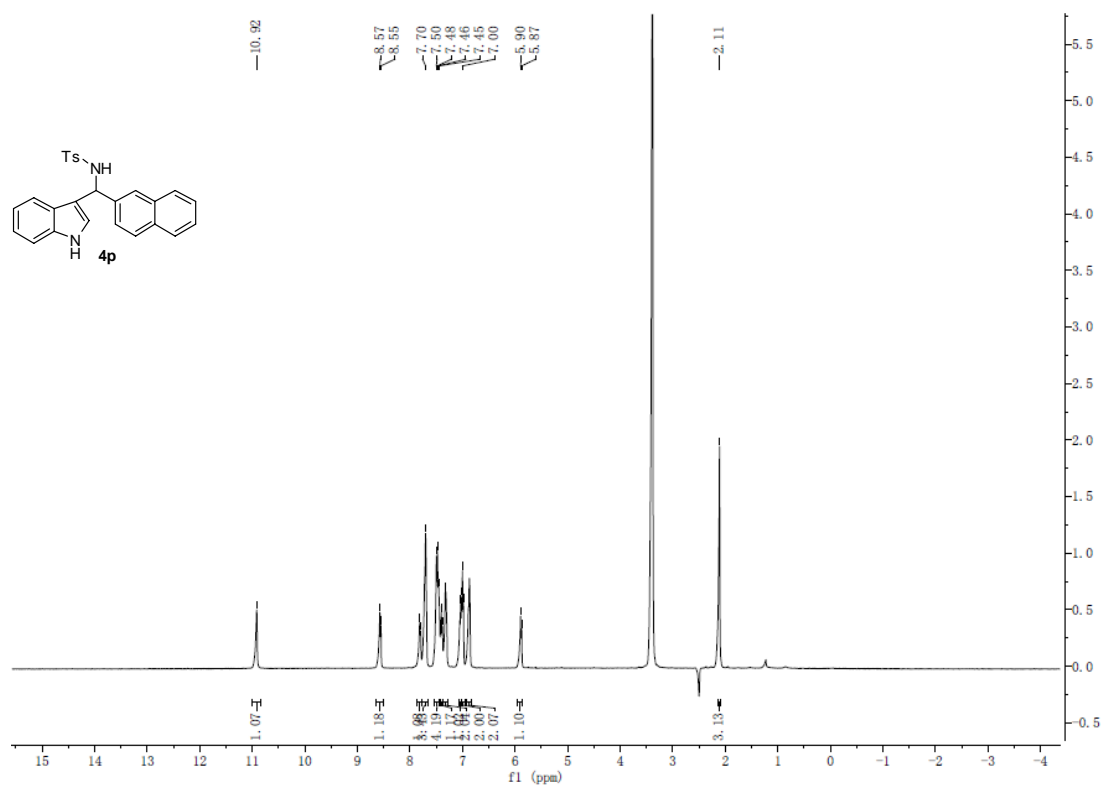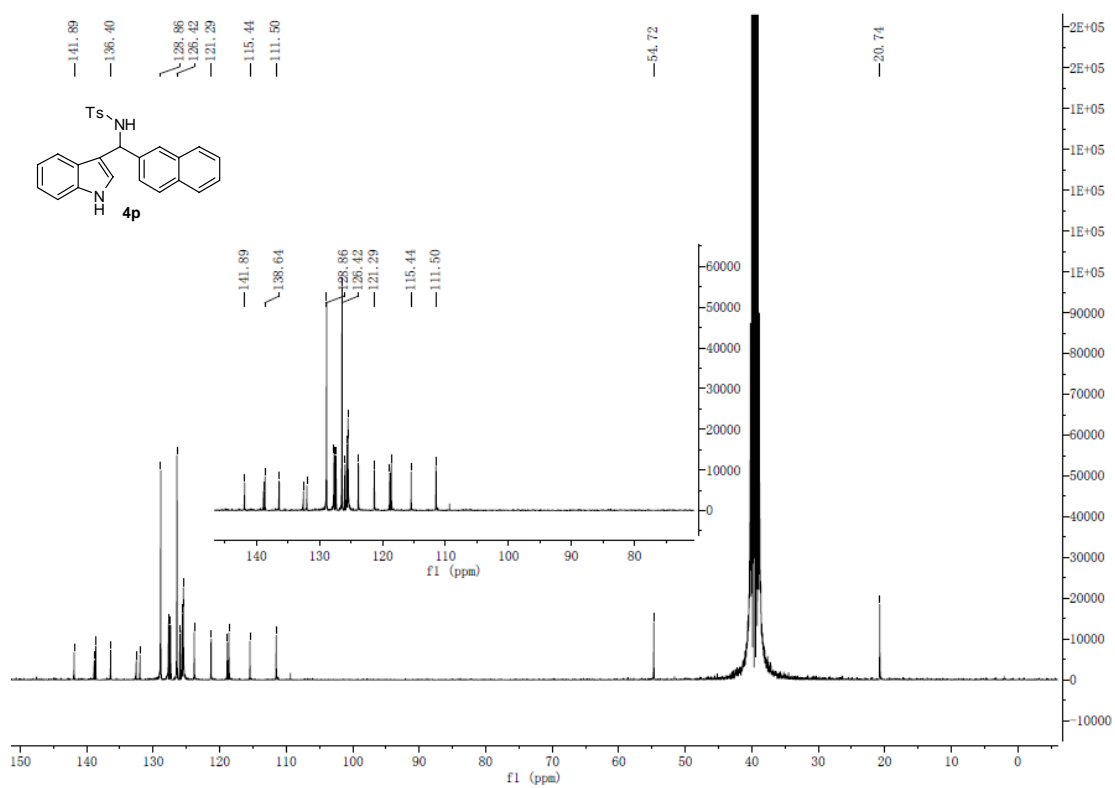

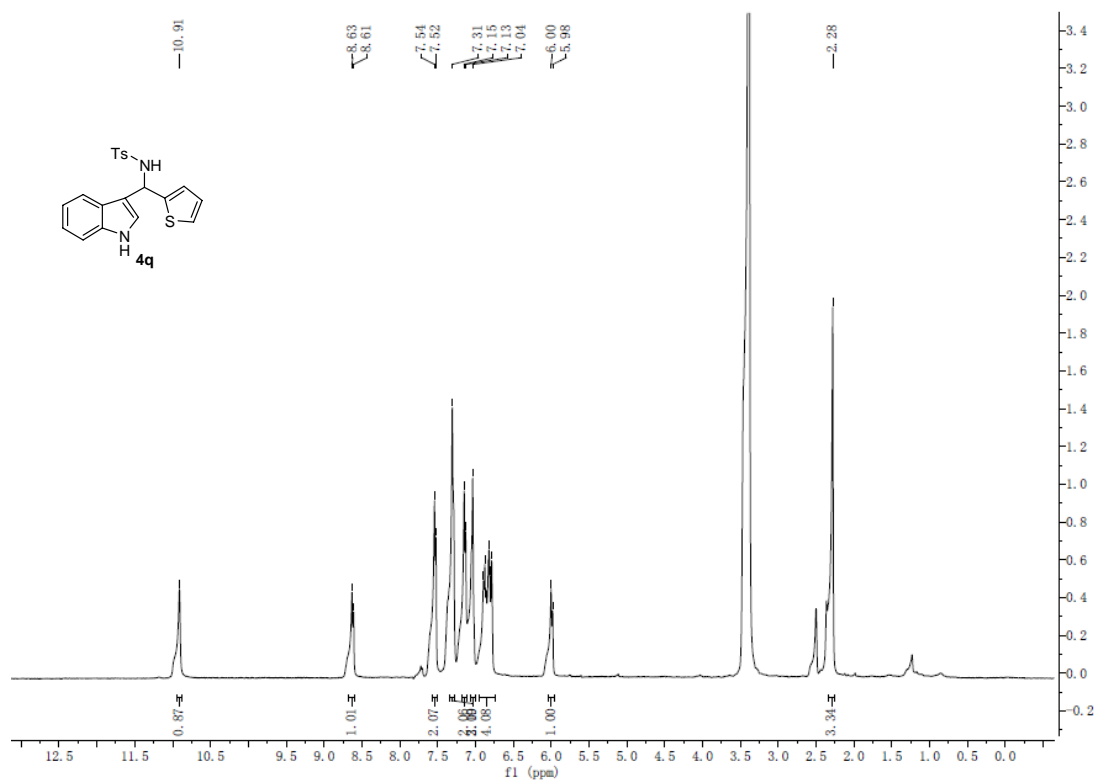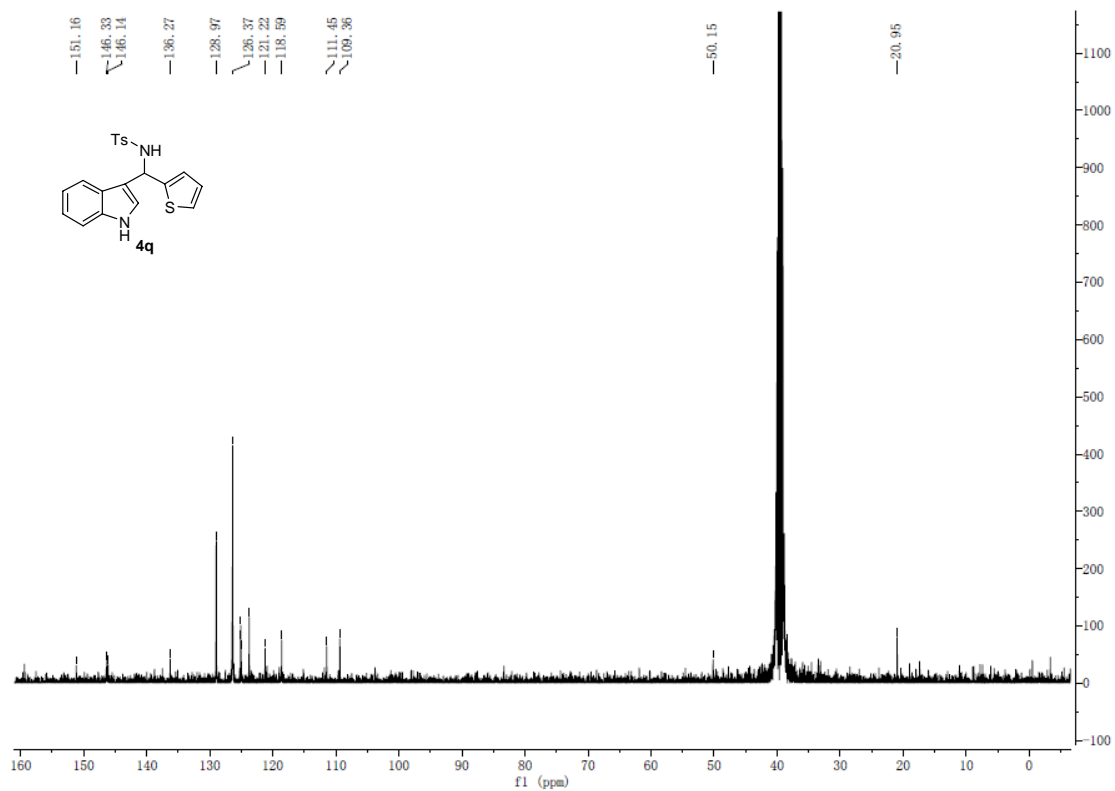

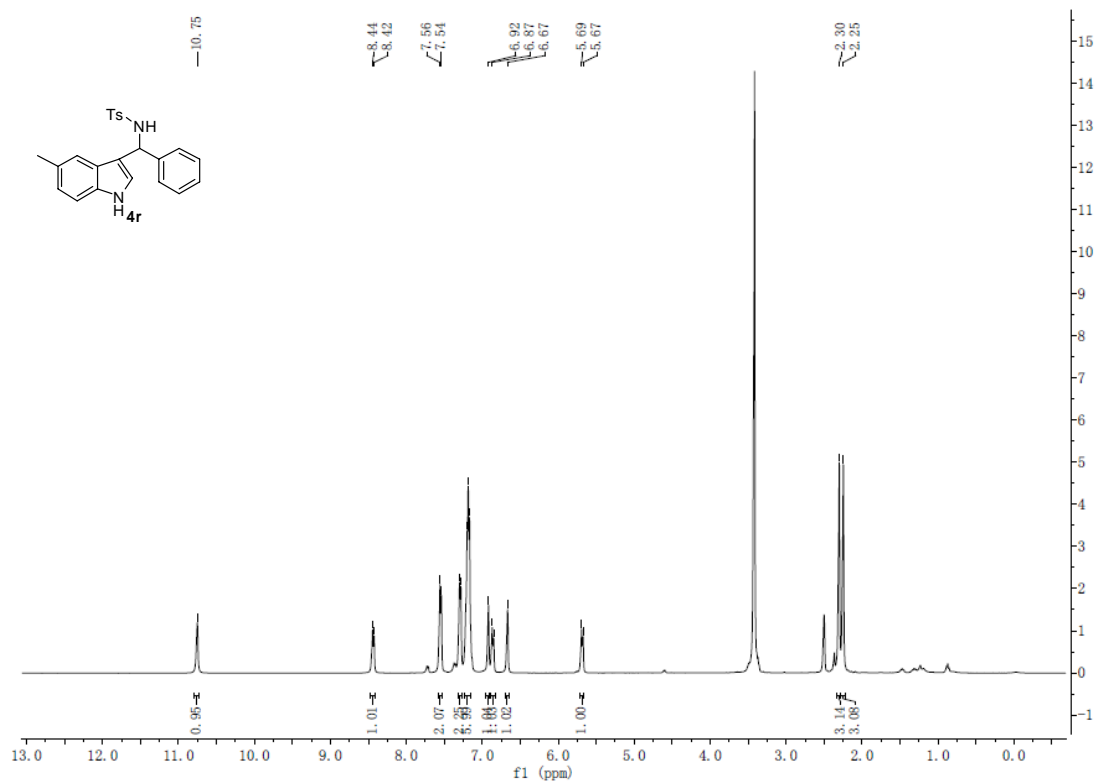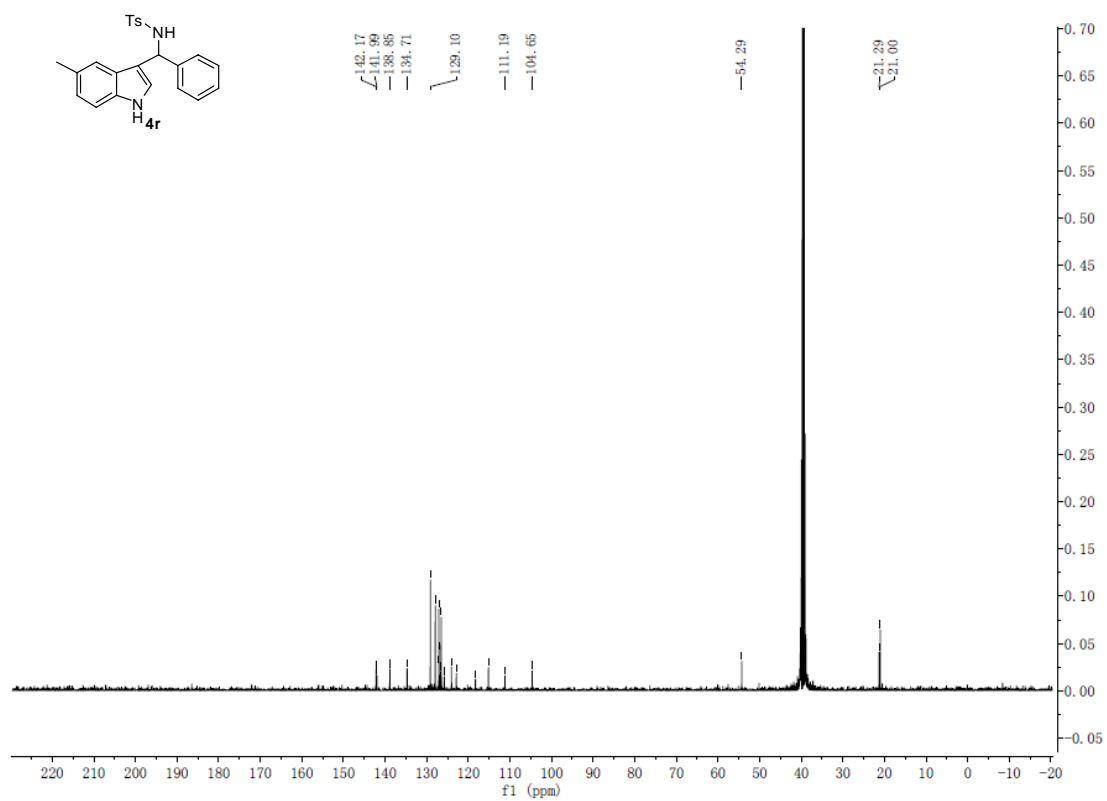

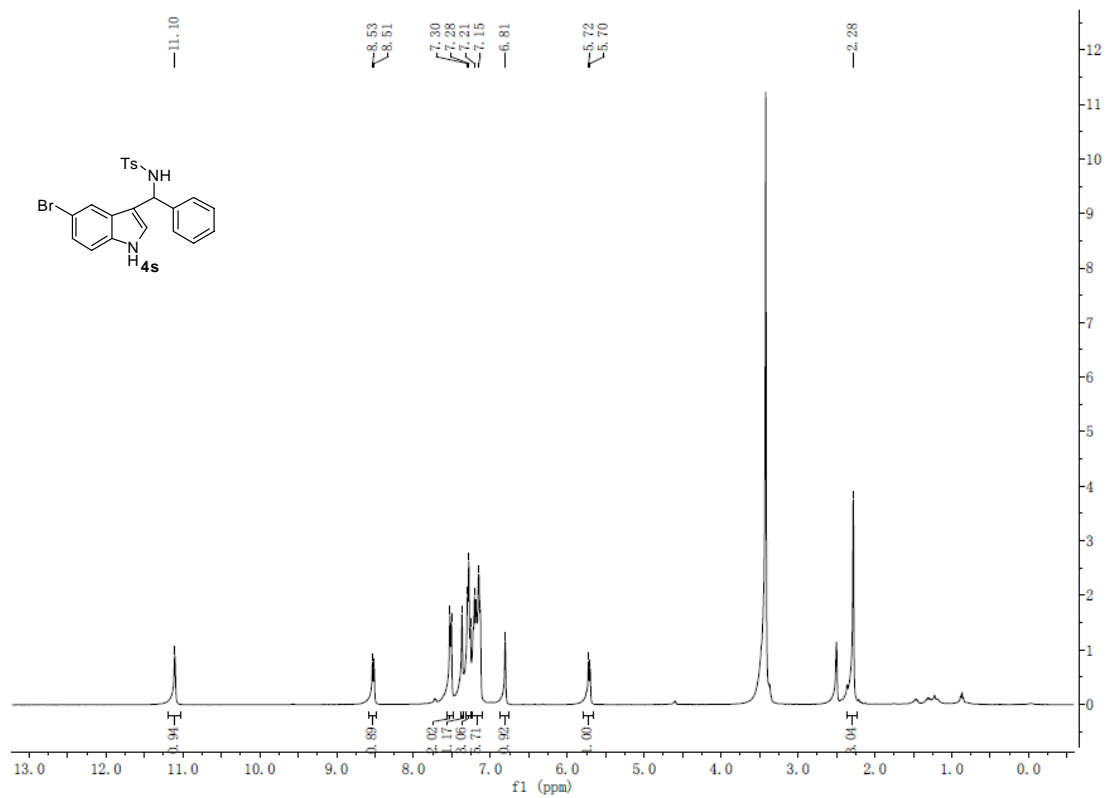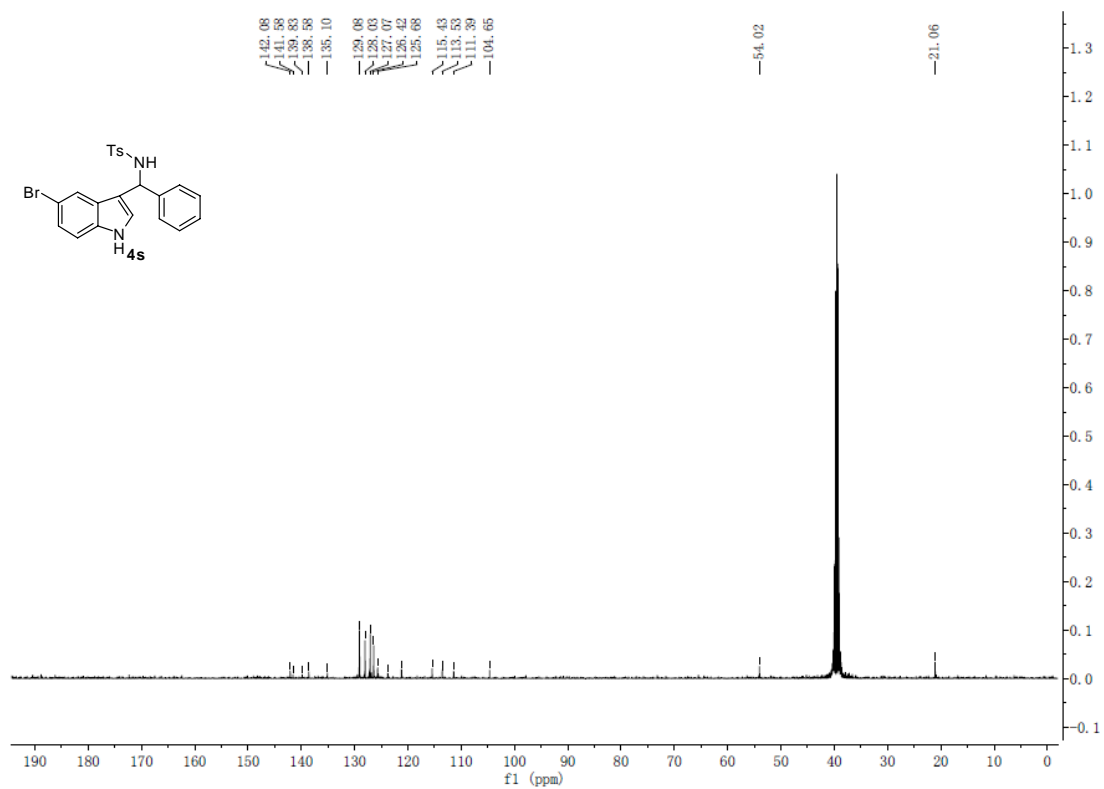

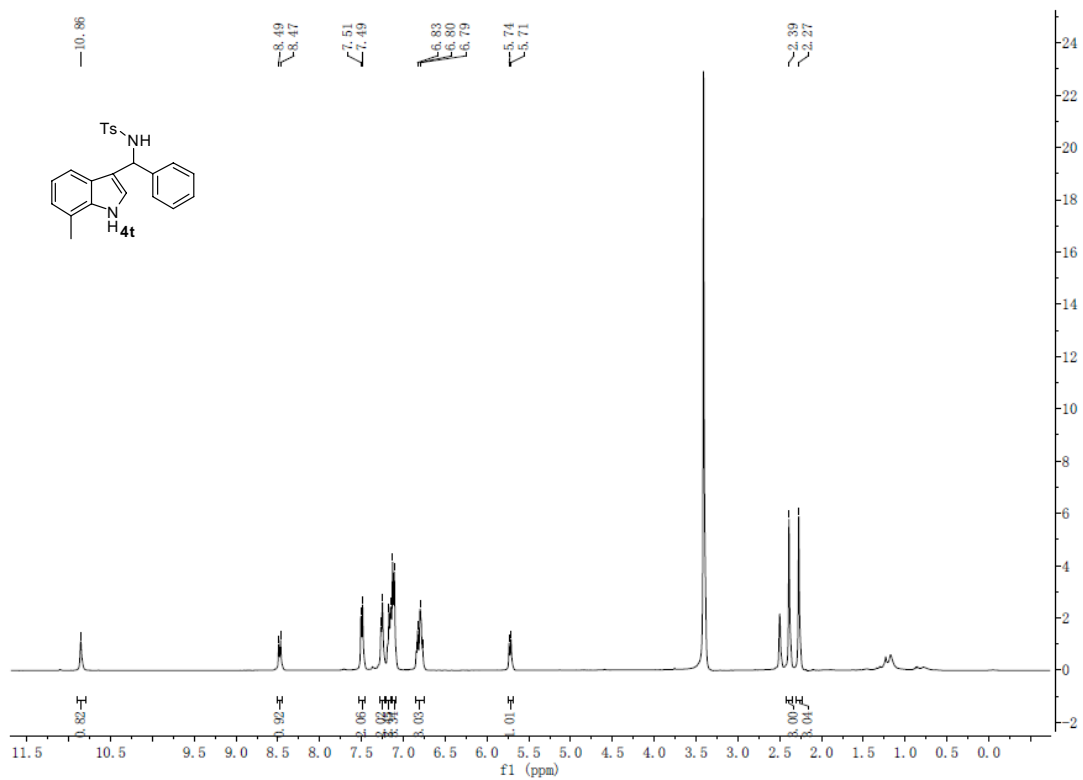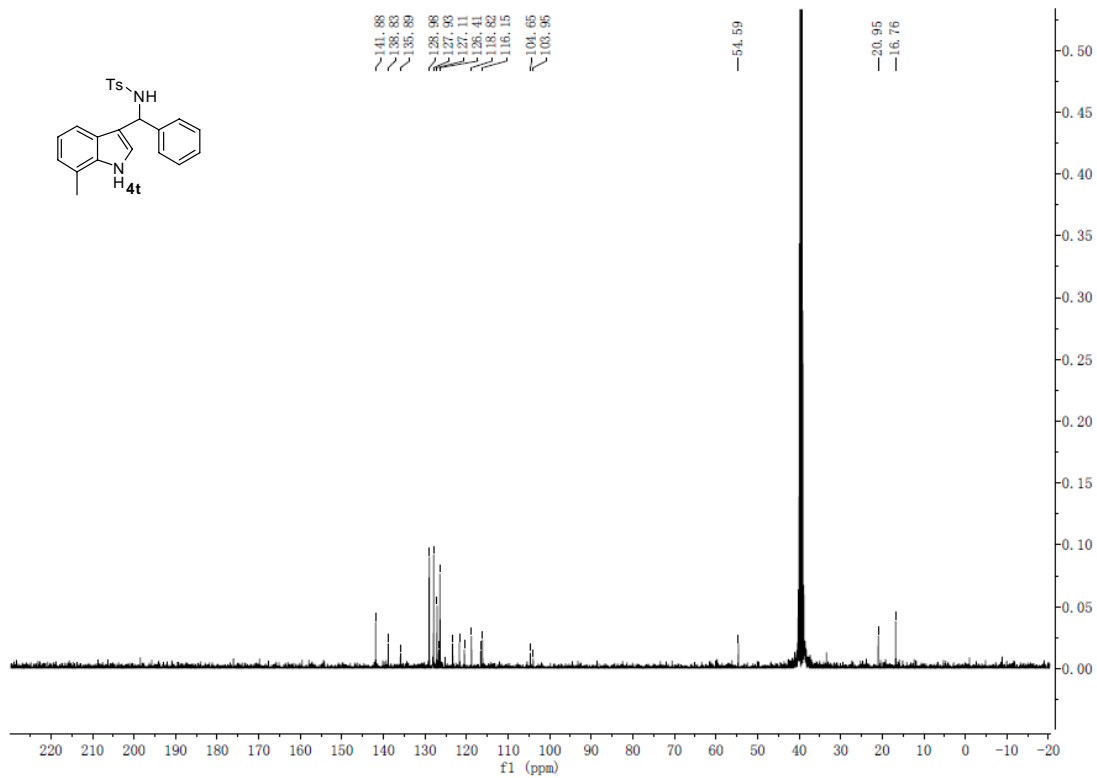

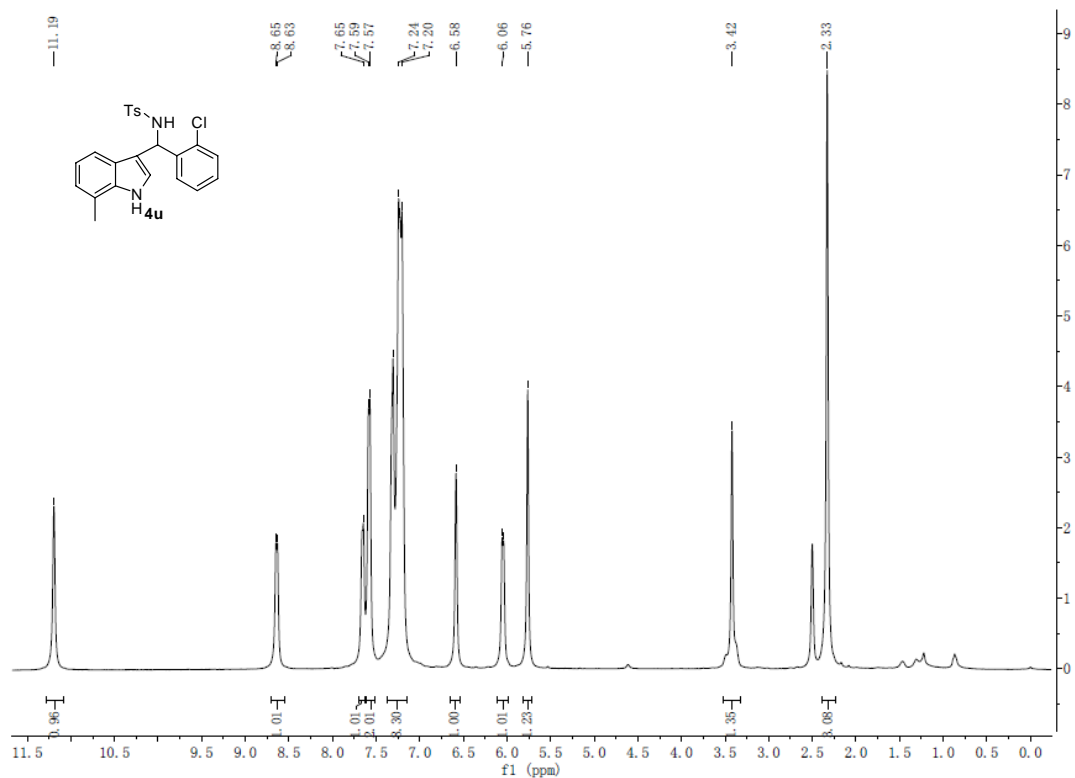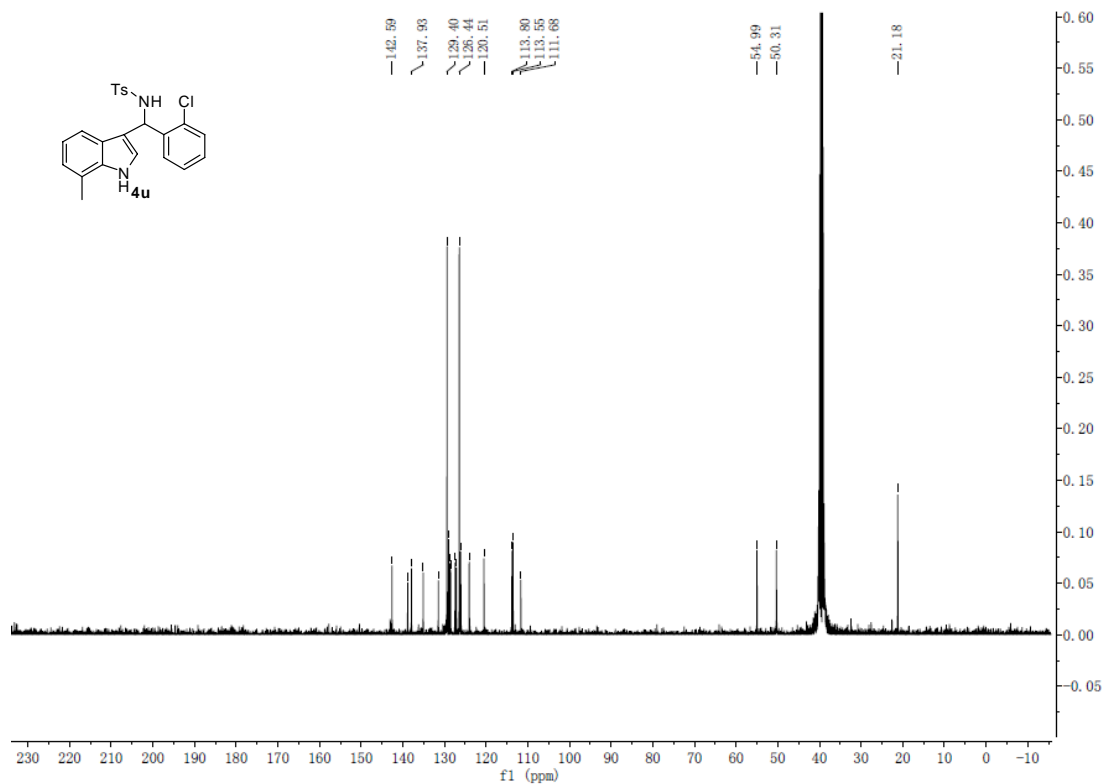



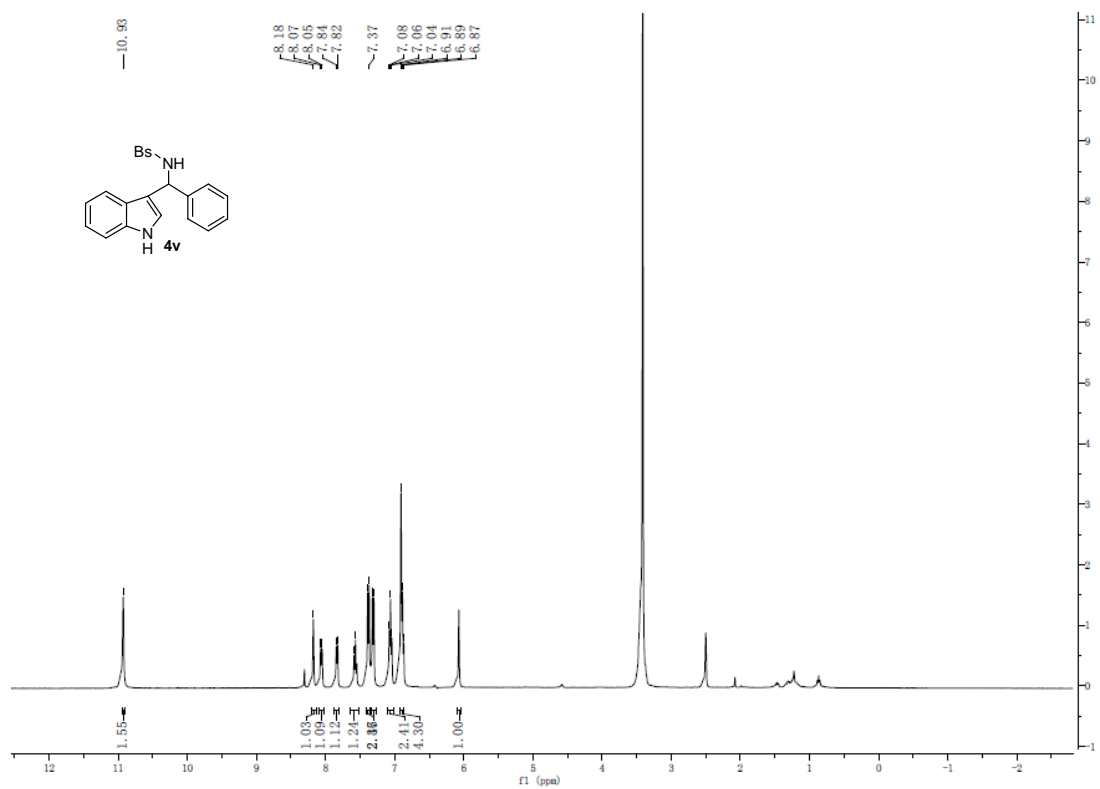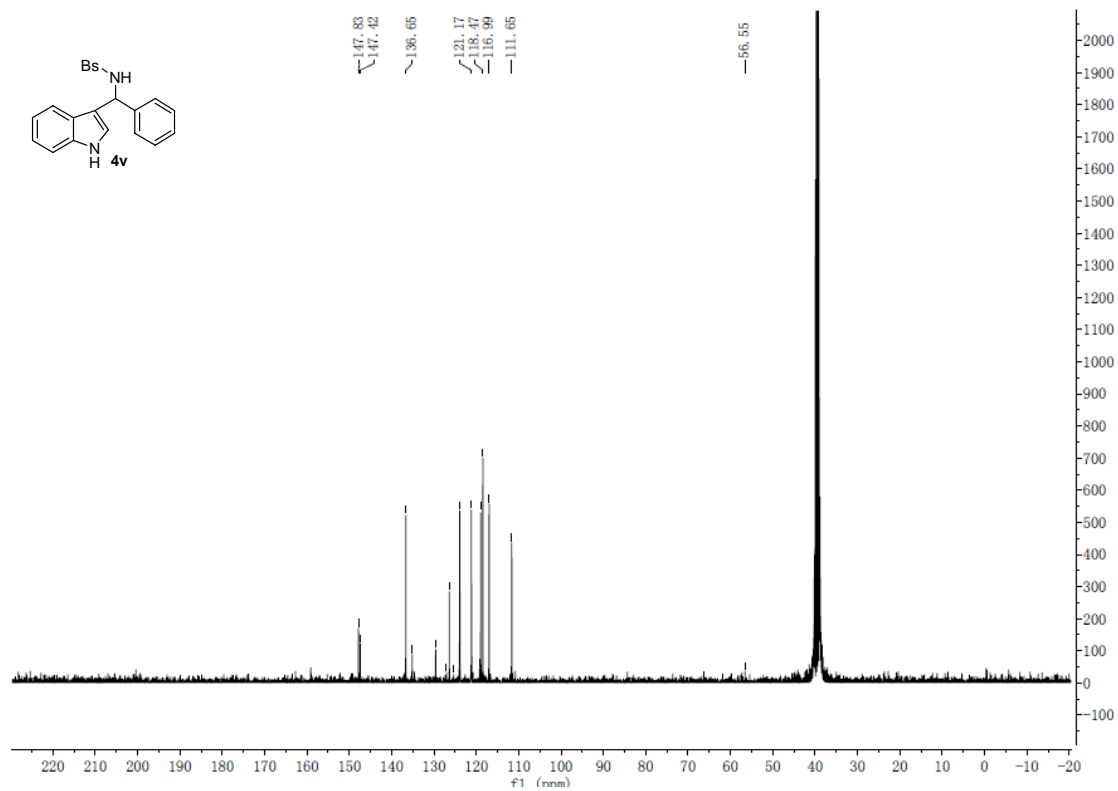

**HPLC spectra for 4a-v:**

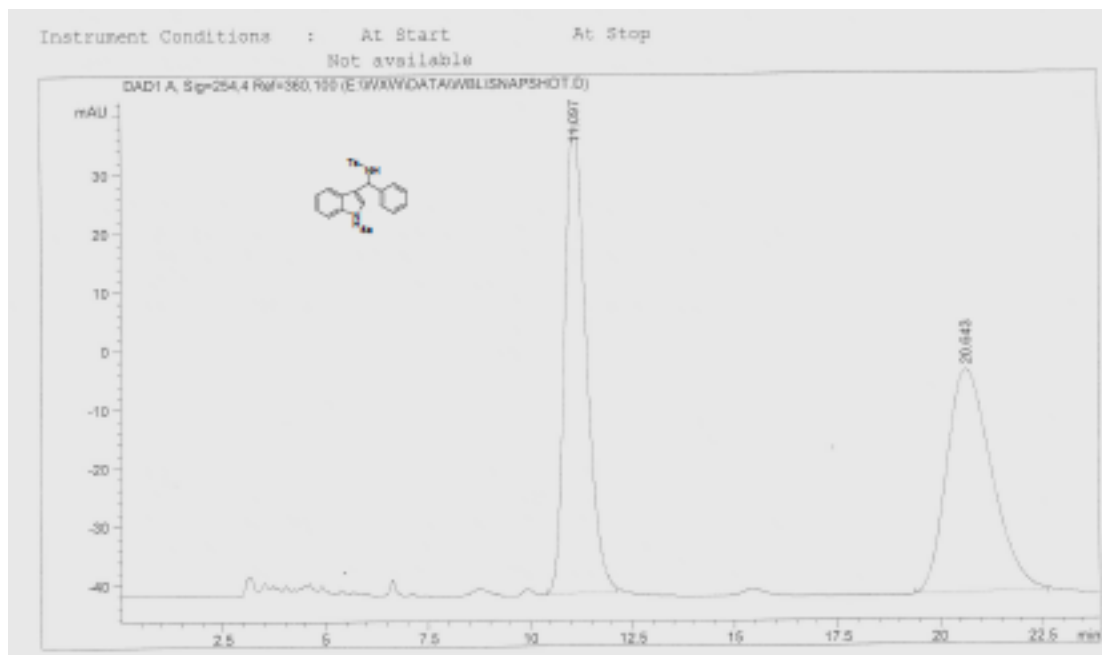

Signal 1: DAD1 A, Sig=254,4 Ref=360,100

| Peak # | RetTime [min] | Type | Width [min] | Area [mAU*s] | Height [mAU] | Area %  |
|--------|---------------|------|-------------|--------------|--------------|---------|
| 1      | 11.097        | BB   | 0.5673      | 2930.96729   | 80.02396     | 50.4683 |
| 2      | 20.643        | BB   | 1.1609      | 2876.57886   | 37.84190     | 49.5317 |

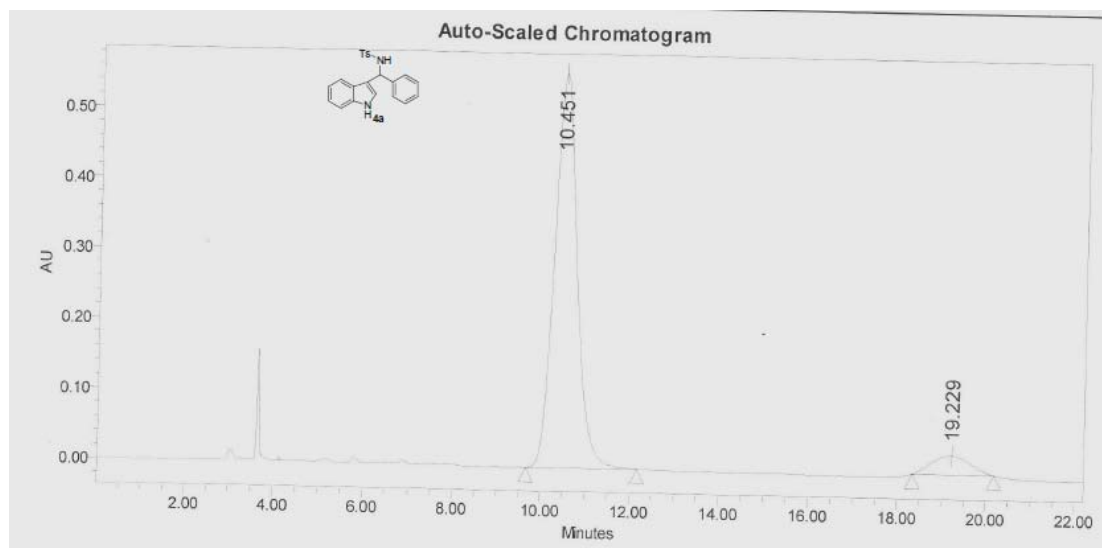

**Peak Results**

| Name | RT     | Area     | % Area | Height (μV) | Amount | Units |
|------|--------|----------|--------|-------------|--------|-------|
| 1    | 10.451 | 19788725 | 92.41  | 559737      |        |       |
| 2    | 19.229 | 1625757  | 7.59   | 27046       |        |       |

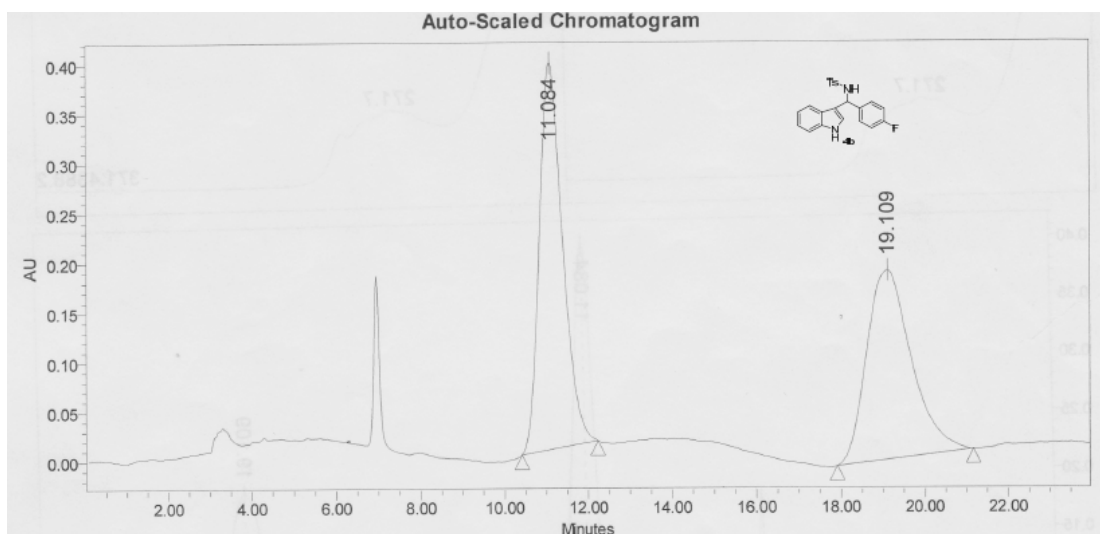

Peak Results

| Name | RT     | Area     | % Area | Height ( $\mu$ V) | Amount | Units |
|------|--------|----------|--------|-------------------|--------|-------|
| 1    | 11.084 | 15041987 | 51.64  | 389399            |        |       |
| 2    | 19.109 | 14086879 | 48.36  | 190528            |        |       |

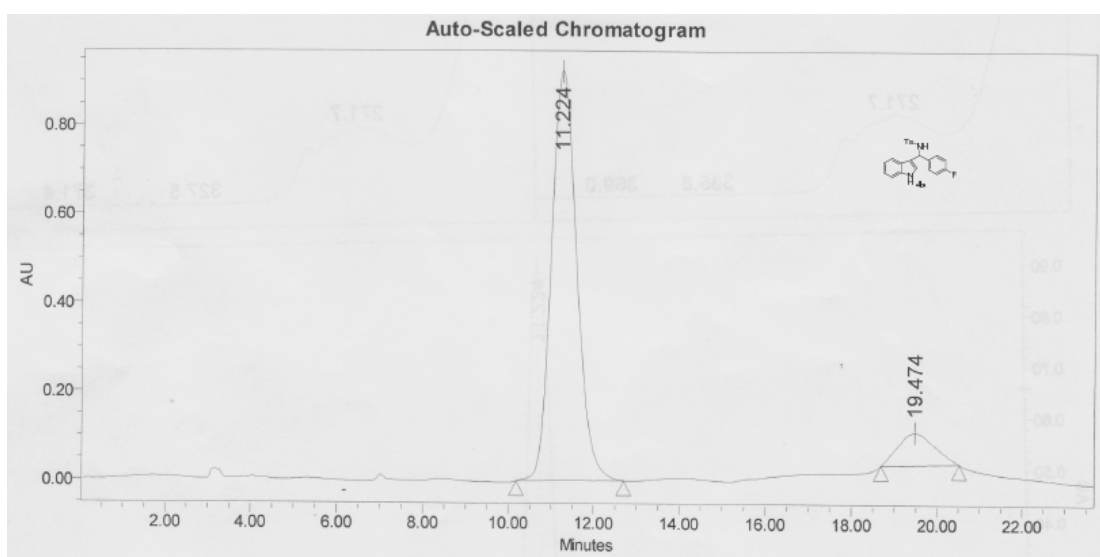

Peak Results

| Name | RT     | Area     | % Area | Height ( $\mu$ V) | Amount | Units |
|------|--------|----------|--------|-------------------|--------|-------|
| 1    | 11.224 | 38074034 | 89.86  | 922904            |        |       |
| 2    | 19.474 | 4298315  | 10.14  | 72808             |        |       |

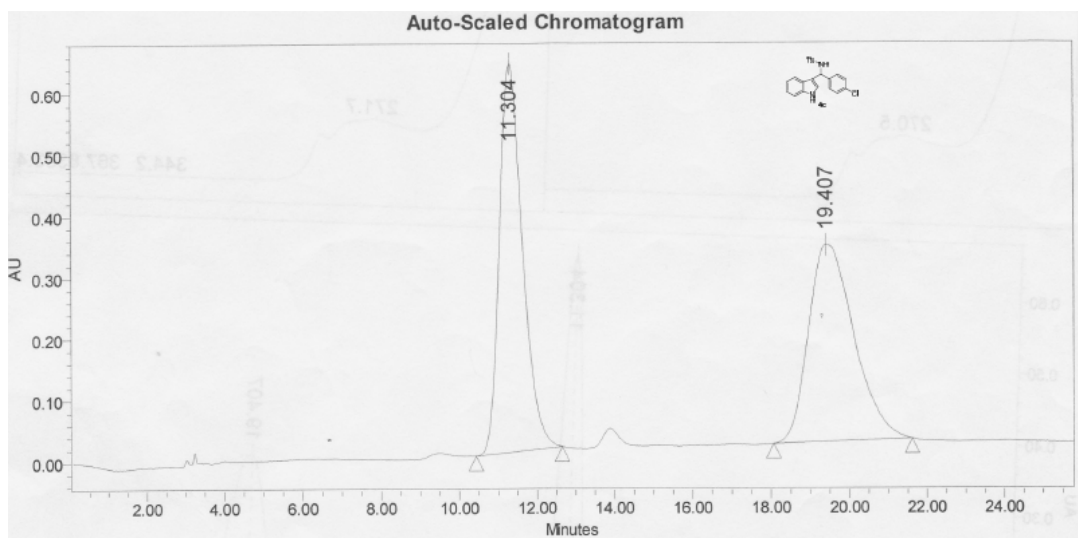

Peak Results

| Name | RT     | Area     | % Area | Height (μV) | Amount | Units |
|------|--------|----------|--------|-------------|--------|-------|
| 1    | 11.304 | 26065372 | 50.36  | 631986      |        |       |
| 2    | 19.407 | 25689703 | 49.64  | 318917      |        |       |

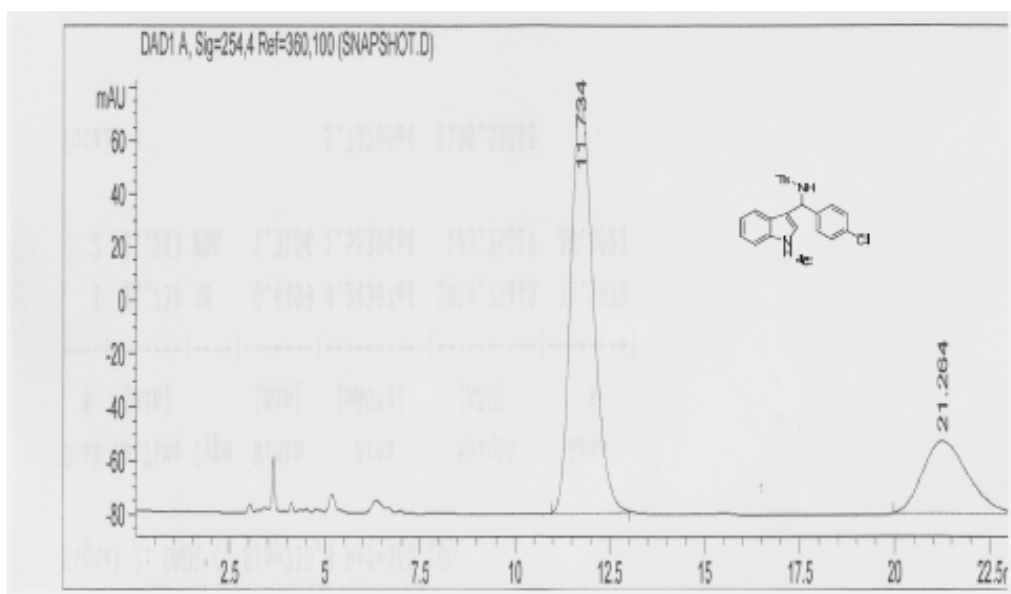

Signal 1: DAD1 A, Sig=254,4 Ref=360,100

| Peak #   | RetTime [min] | Type | Width [min] | Area [mAU*s] | Height [mAU] | Area %  |
|----------|---------------|------|-------------|--------------|--------------|---------|
| 1        | 11.734        | BB   | 0.6388      | 6392.87451   | 155.12595    | 73.9909 |
| 2        | 21.264        | BB   | 1.2775      | 2247.21143   | 27.32549     | 26.0091 |
| Totals : |               |      |             | 8640.08594   | 182.45144    |         |

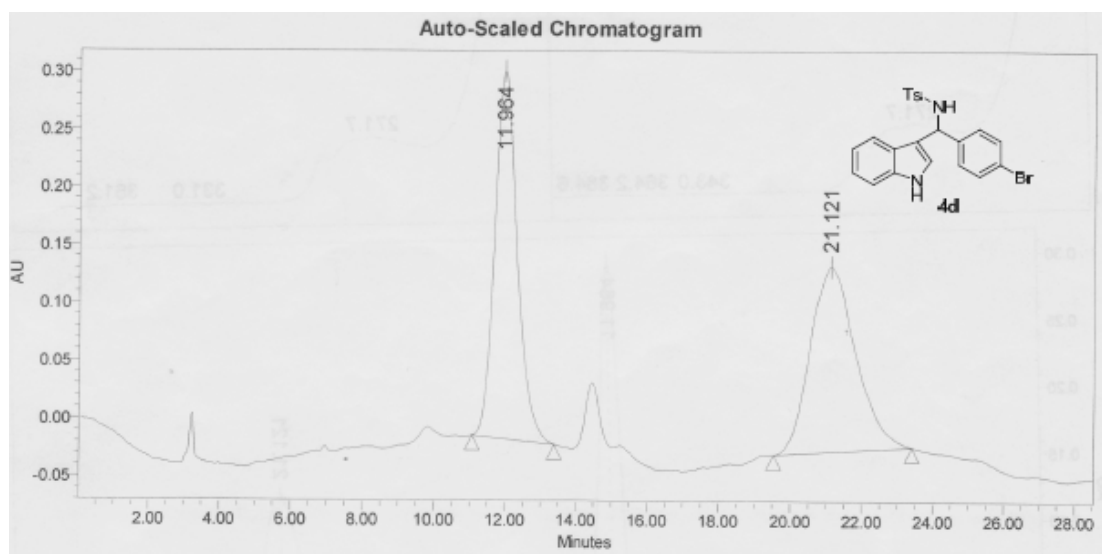

Peak Results

| Name | RT     | Area     | % Area | Height ( $\mu\text{V}$ ) | Amount | Units |
|------|--------|----------|--------|--------------------------|--------|-------|
| 1    | 11.964 | 13944399 | 49.76  | 317495                   |        |       |
| 2    | 21.121 | 14076166 | 50.24  | 159222                   |        |       |

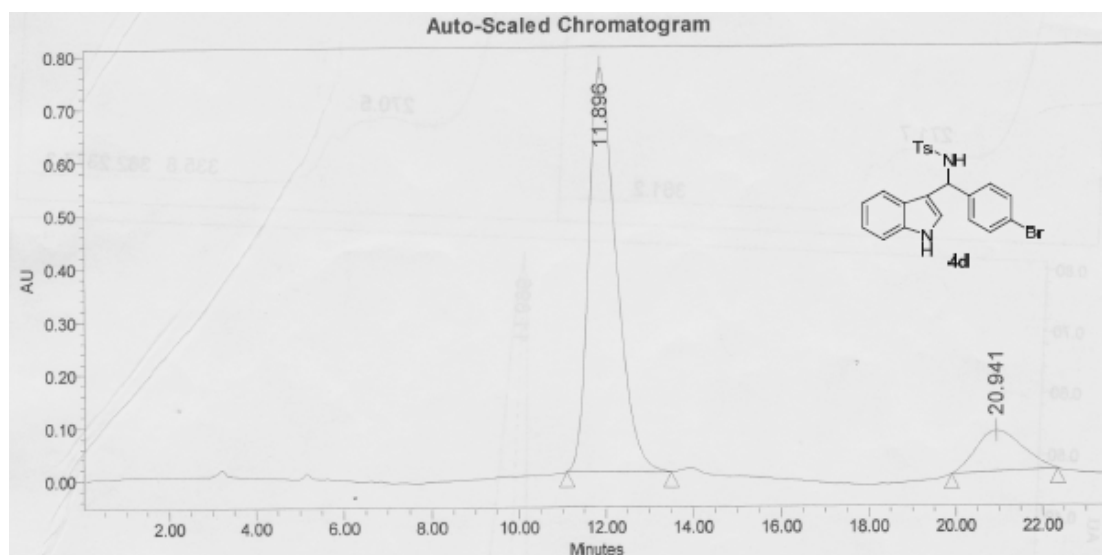

Peak Results

| Name | RT     | Area     | % Area | Height ( $\mu\text{V}$ ) | Amount | Units |
|------|--------|----------|--------|--------------------------|--------|-------|
| 1    | 11.896 | 33694463 | 85.51  | 761337                   |        |       |
| 2    | 20.941 | 5707367  | 14.49  | 76482                    |        |       |

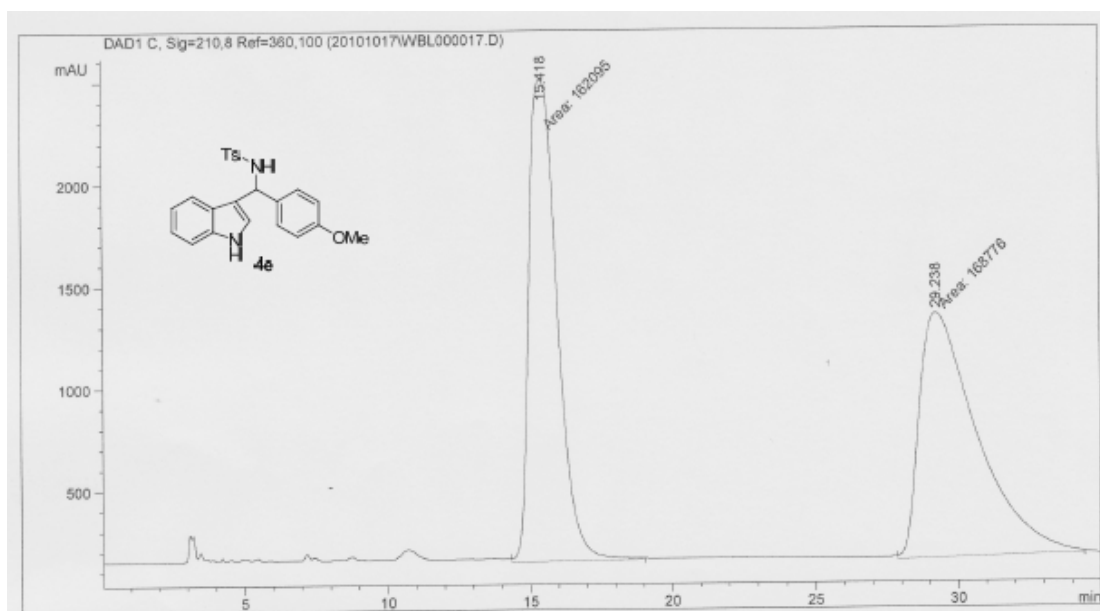

Signal 1: DAD1 C, Sig=210,8 Ref=360,100

| Peak #   | RetTime [min] | Type | Width [min] | Area [mAU*s] | Height [mAU] | Area %  |
|----------|---------------|------|-------------|--------------|--------------|---------|
| 1        | 15.418        | MM   | 1.1457      | 1.62095e5    | 2357.93604   | 48.9904 |
| 2        | 29.238        | MM   | 2.3469      | 1.68776e5    | 1198.58911   | 51.0096 |
| Totals : |               |      |             | 3.30871e5    | 3556.52515   |         |

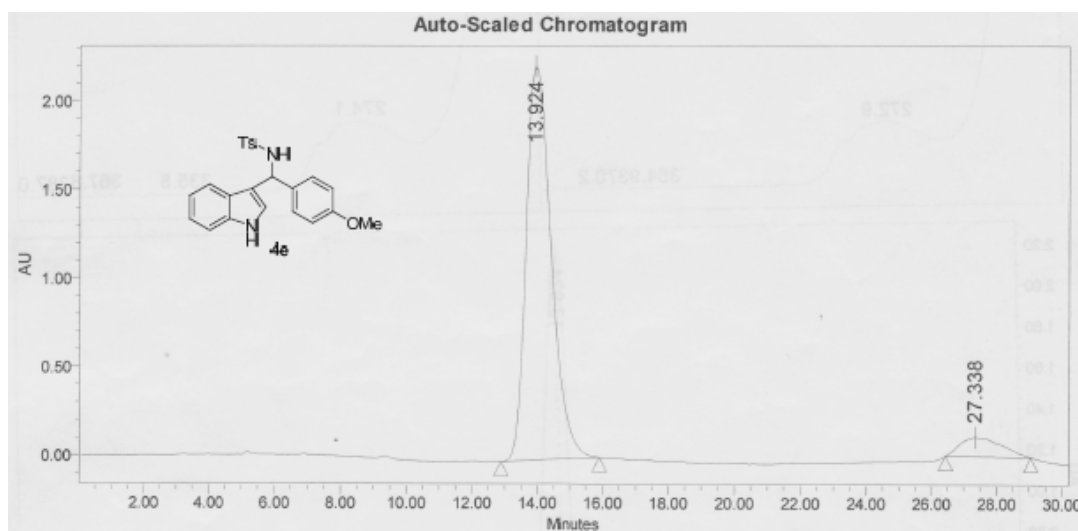

Peak Results

| Name | RT     | Area      | % Area | Height (μV) | Amount | Units |
|------|--------|-----------|--------|-------------|--------|-------|
| 1    | 13.924 | 118306911 | 92.51  | 2222470     |        |       |
| 2    | 27.338 | 9574203   | 7.49   | 107641      |        |       |

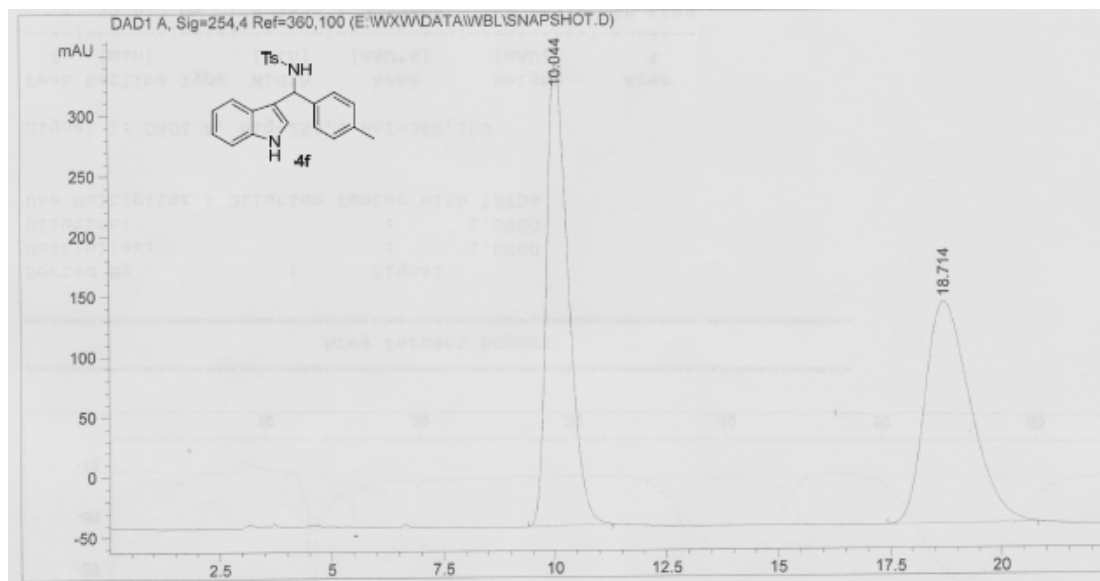

Signal 1: DAD1 A, Sig=254,4 Ref=360,100

| Peak #   | RetTime [min] | Type | Width [min] | Area [mAU*s] | Height [mAU] | Area %  |
|----------|---------------|------|-------------|--------------|--------------|---------|
| 1        | 10.044        | BB   | 0.5228      | 1.30449e4    | 385.53177    | 50.0386 |
| 2        | 18.714        | BB   | 1.0885      | 1.30248e4    | 183.40030    | 49.9614 |
| Totals : |               |      |             | 2.60697e4    | 568.93207    |         |

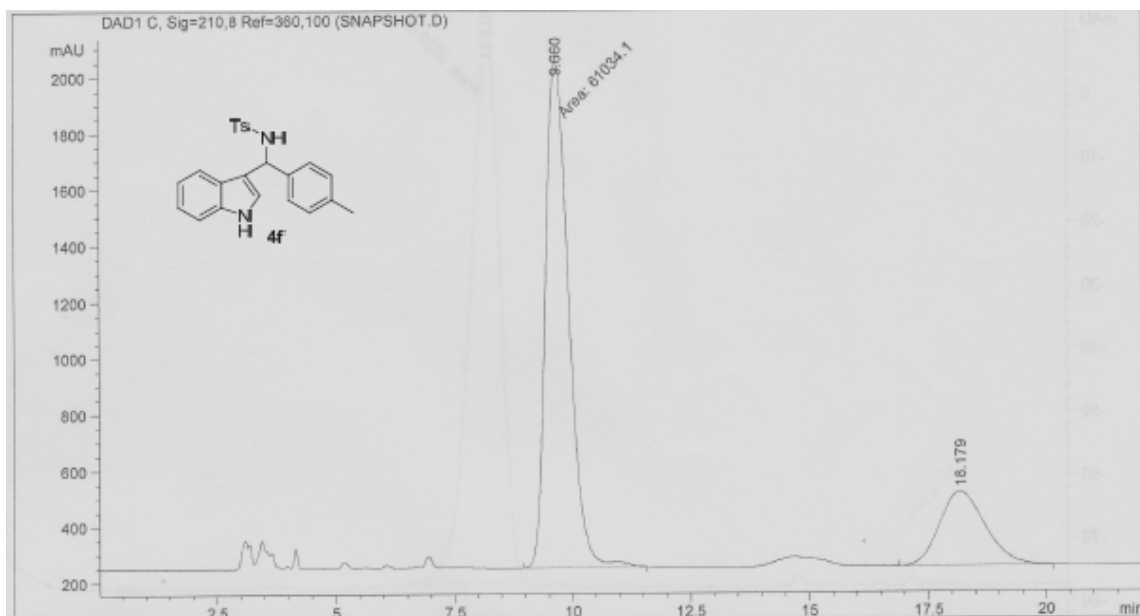

Signal 1: DAD1 C, Sig=210,8 Ref=360,100

| Peak #   | RetTime [min] | Type | Width [min] | Area [mAU*s] | Height [mAU] | Area %  |
|----------|---------------|------|-------------|--------------|--------------|---------|
| 1        | 9.660         | MM   | 0.5658      | 6.10341e4    | 1797.76428   | 77.5492 |
| 2        | 18.179        | BB   | 1.0515      | 1.76696e4    | 262.43613    | 22.4508 |
| Totals : |               |      |             | 7.87037e4    | 2060.20041   |         |

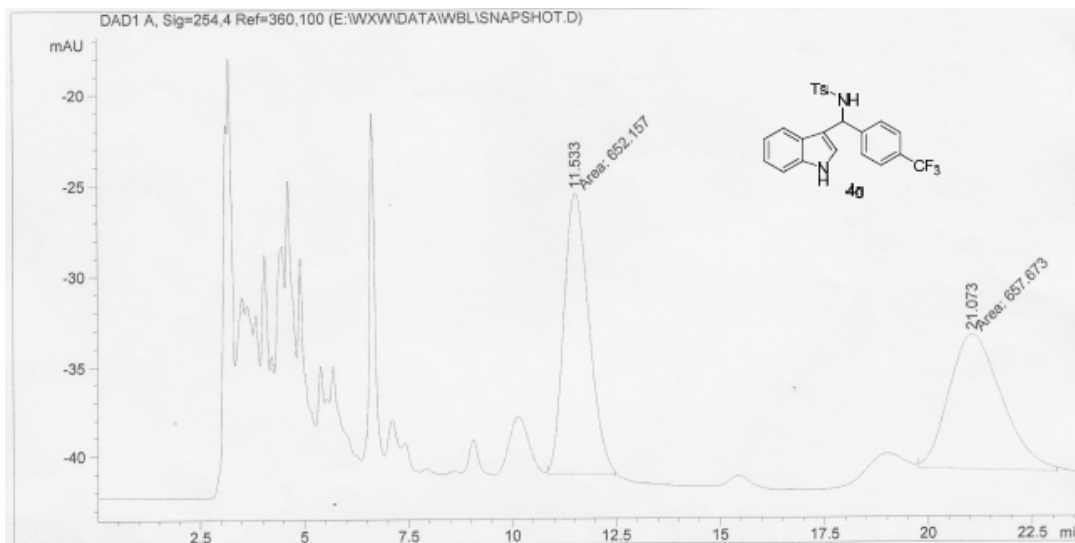

Signal 1: DAD1 A, Sig=254,4 Ref=360,100

| Peak # | RetTime [min] | Type | Width [min] | Area [mAU*s] | Height [mAU] | Area %  |
|--------|---------------|------|-------------|--------------|--------------|---------|
| 1      | 11.533        | MM   | 0.6975      | 652.15656    | 15.58248     | 49.7894 |
| 2      | 21.073        | MM   | 1.4626      | 657.67255    | 7.49431      | 50.2106 |

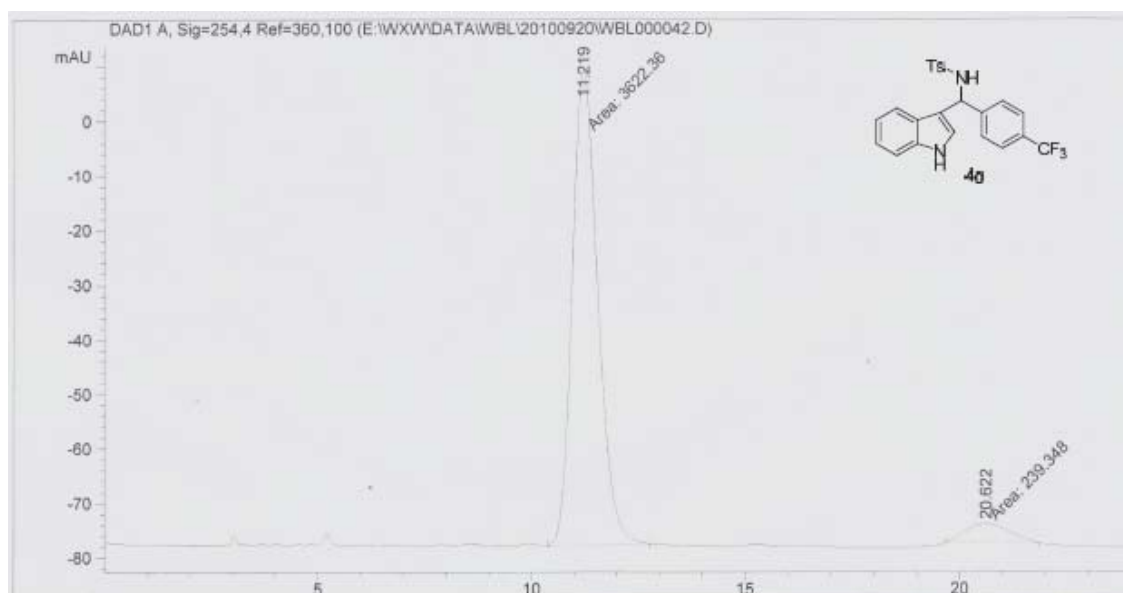

Signal 1: DAD1 A, Sig=254,4 Ref=360,100

| Peak #   | RetTime [min] | Type | Width [min] | Area [mAU*s] | Height [mAU] | Area %  |
|----------|---------------|------|-------------|--------------|--------------|---------|
| 1        | 11.219        | MM   | 0.6953      | 3622.36304   | 86.82523     | 93.8020 |
| 2        | 20.622        | MM   | 1.1824      | 239.34805    | 3.37363      | 6.1980  |
| Totals : |               |      |             | 3861.71109   | 90.19886     |         |



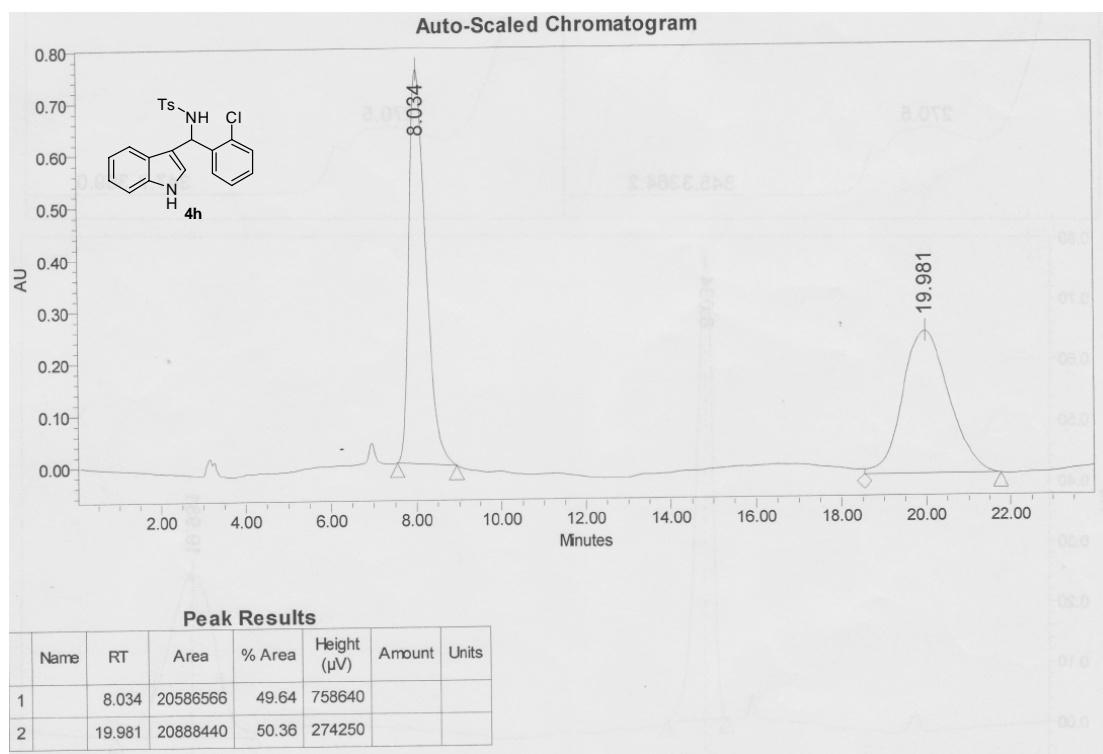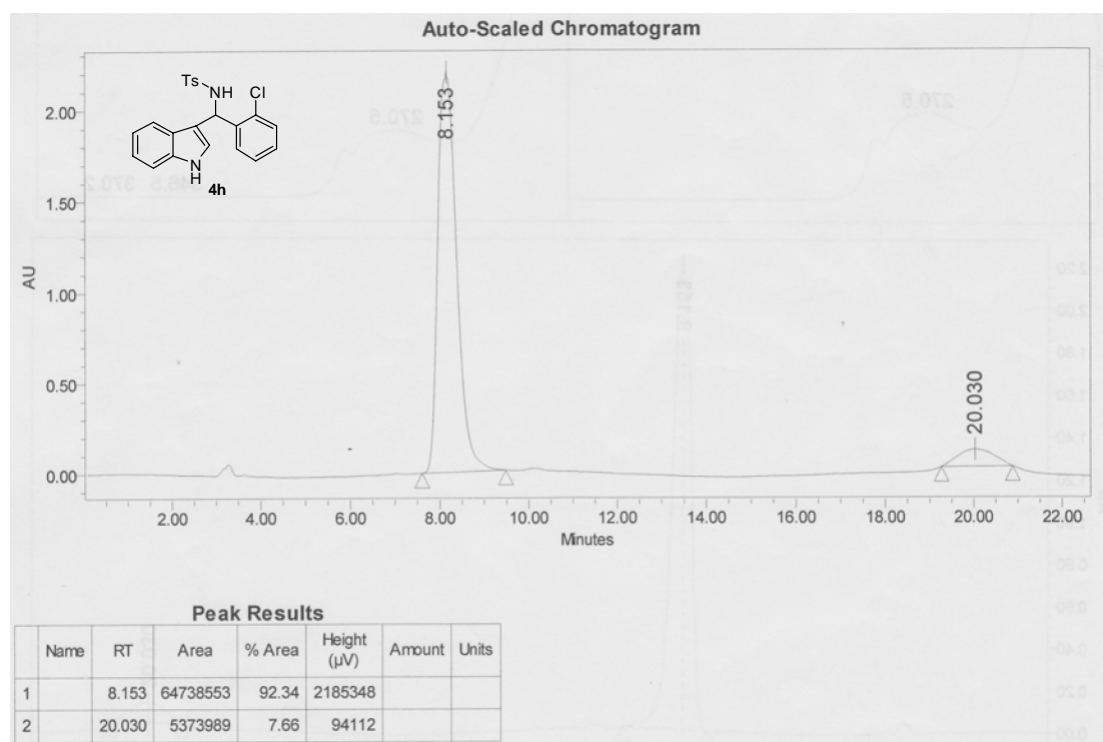

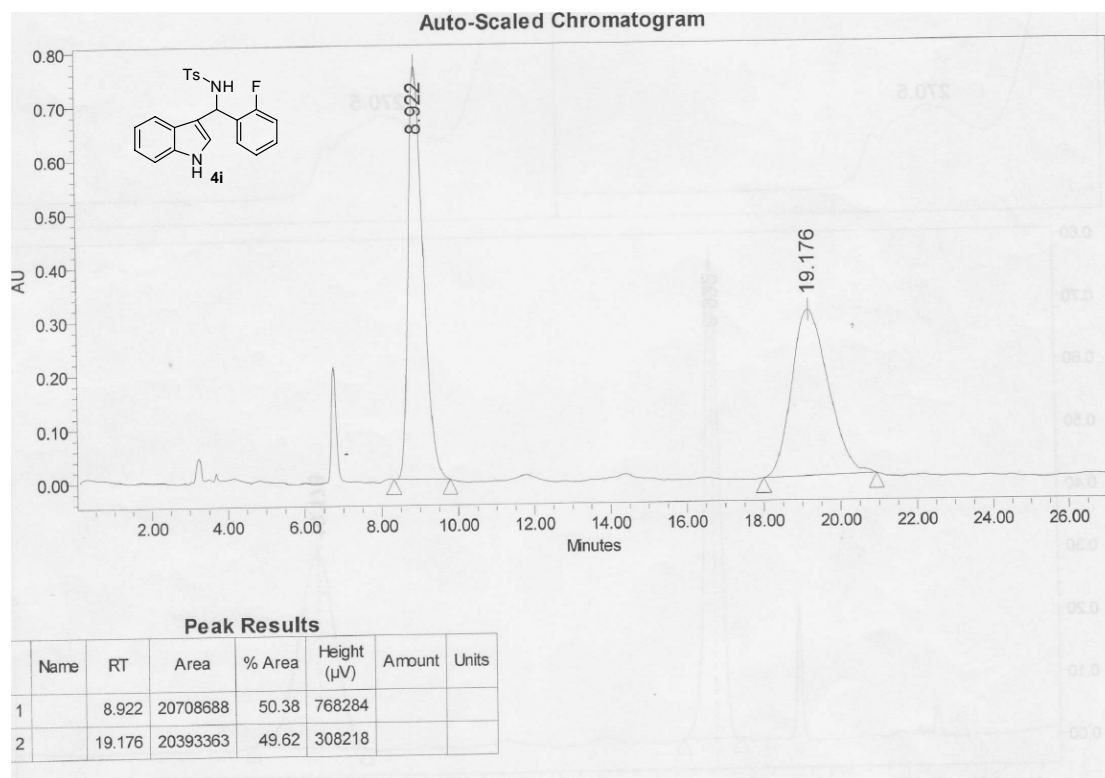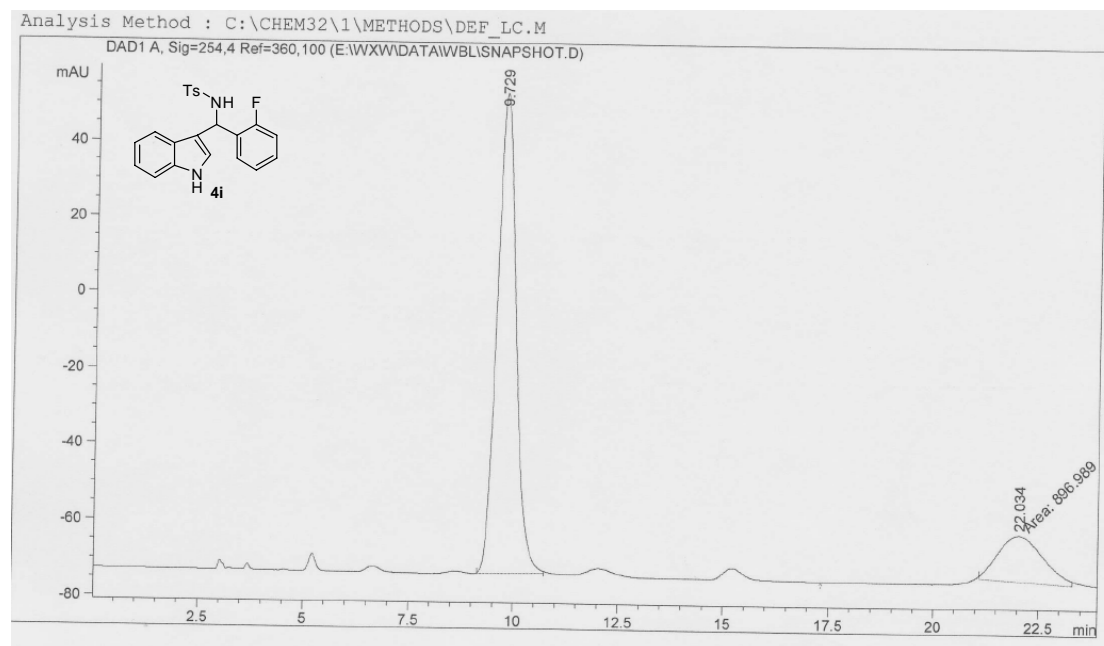

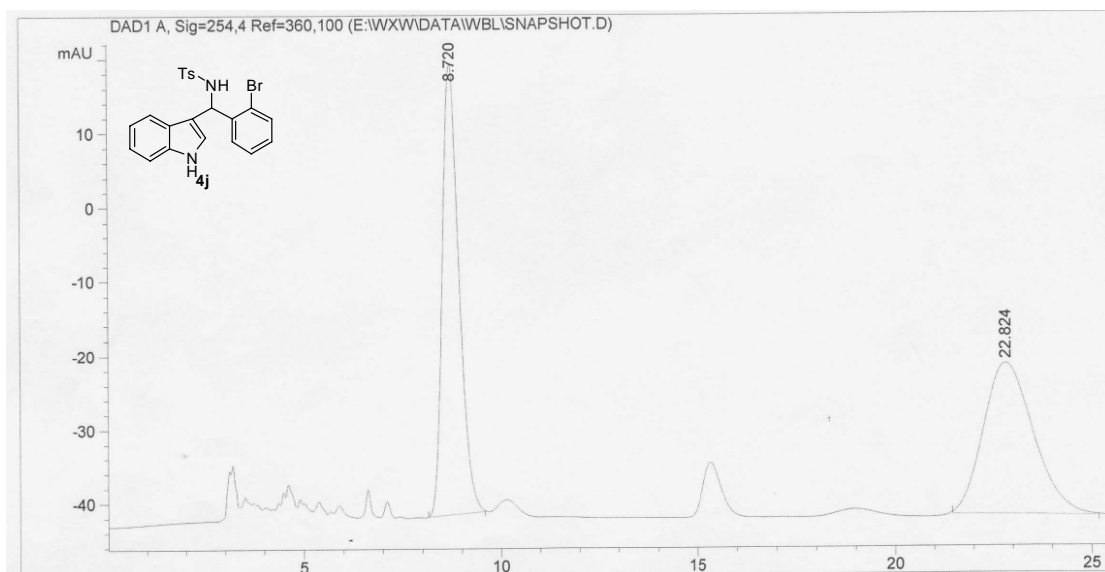

| Peak # | RetTime [min] | Type | Width [min] | Area [mAU*s] | Height [mAU] | Area %  |
|--------|---------------|------|-------------|--------------|--------------|---------|
| 1      | 8.720         | BB   | 0.4613      | 1808.43274   | 60.74955     | 50.1153 |
| 2      | 22.824        | BB   | 1.3826      | 1800.11157   | 20.37676     | 49.8847 |

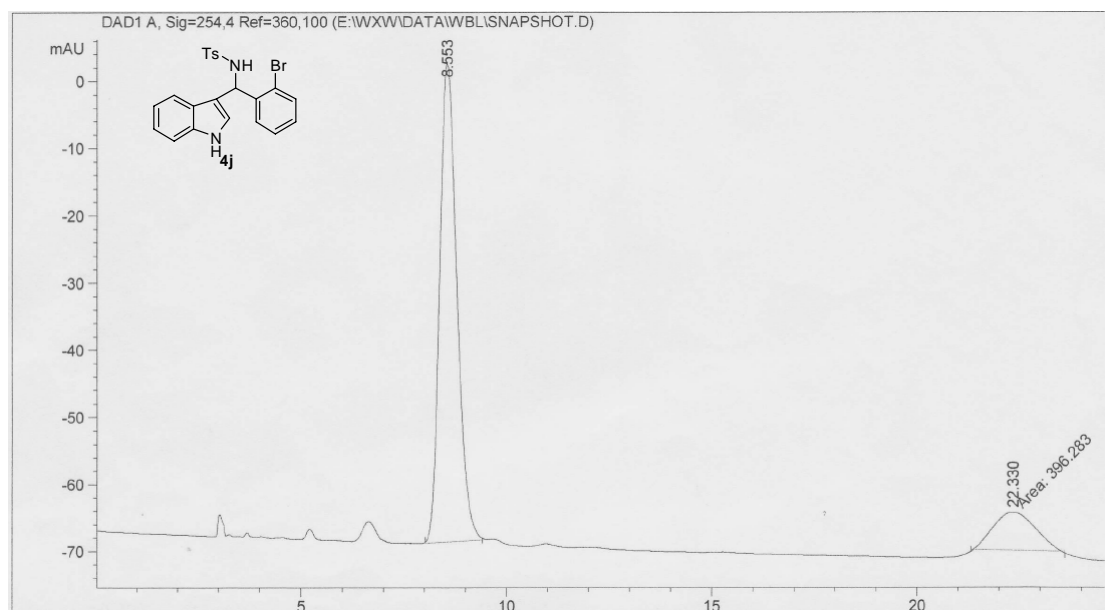

| Peak # | RetTime [min] | Type | Width [min] | Area [mAU*s] | Height [mAU] | Area %  |
|--------|---------------|------|-------------|--------------|--------------|---------|
| 1      | 8.553         | BB   | 0.4492      | 2069.39648   | 71.17509     | 83.9280 |
| 2      | 22.330        | MM   | 1.1672      | 396.28342    | 5.65869      | 16.0720 |

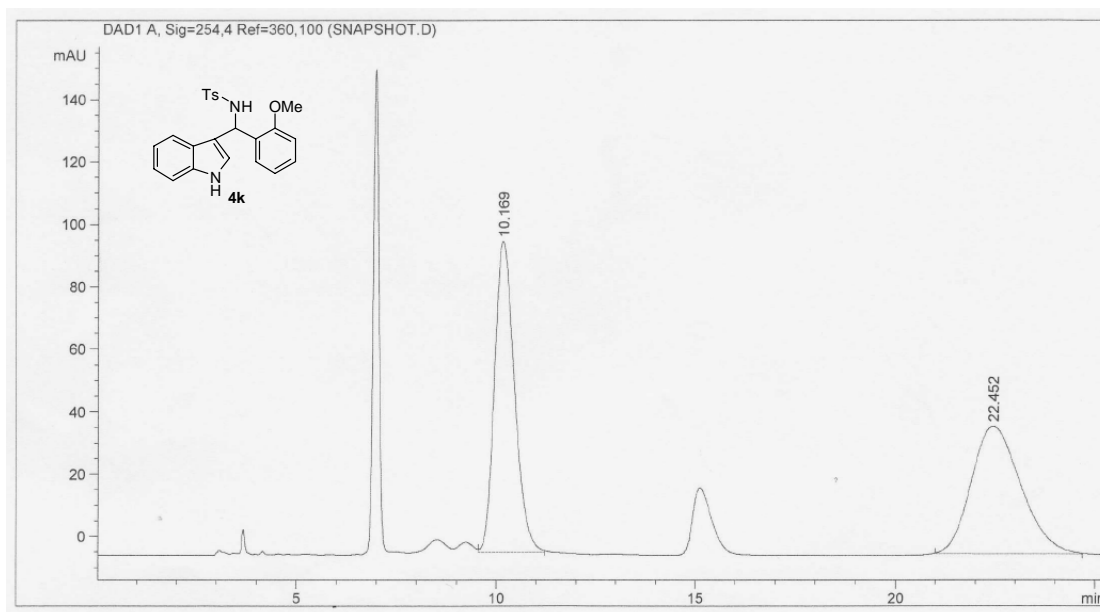

| Peak # | RetTime [min] | Type | Width [min] | Area [mAU*s] | Height [mAU] | Area %  |
|--------|---------------|------|-------------|--------------|--------------|---------|
| 1      | 10.169        | VB   | 0.5379      | 3471.28052   | 99.78627     | 49.6501 |
| 2      | 22.452        | BB   | 1.3159      | 3520.20972   | 40.82874     | 50.3499 |

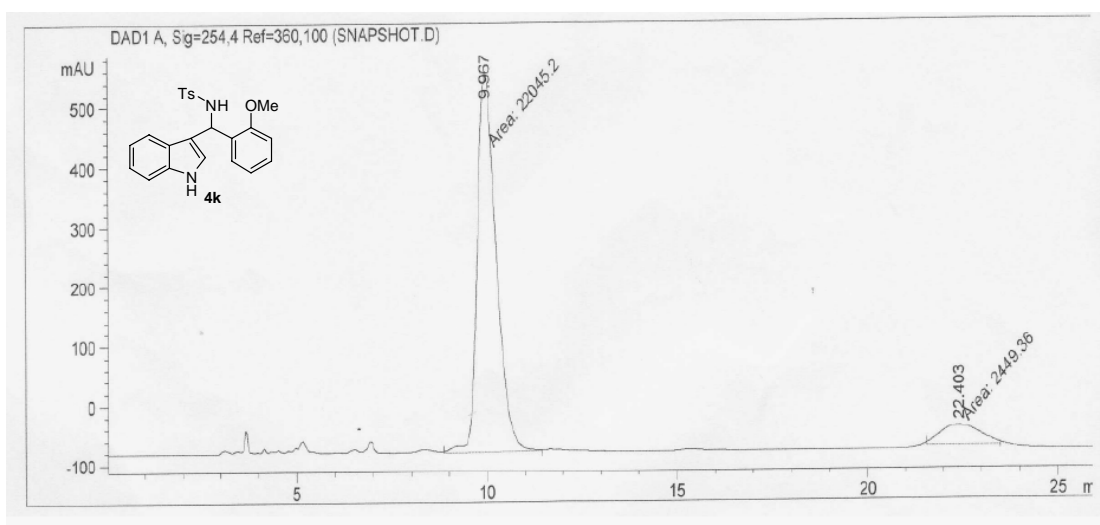

| Peak # | RetTime [min] | Type | Width [min] | Area [mAU*s] | Height [mAU] | Area %  |
|--------|---------------|------|-------------|--------------|--------------|---------|
| 1      | 9.967         | MM   | 0.5786      | 2.20452e4    | 635.04474    | 90.0004 |
| 2      | 22.403        | MM   | 1.1948      | 2449.35645   | 34.16690     | 9.9996  |

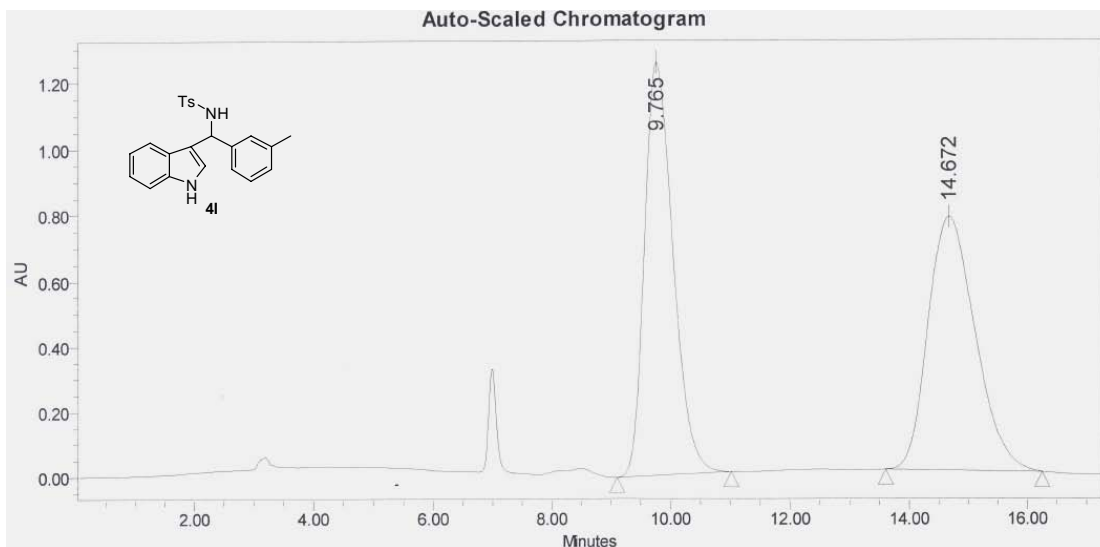

**Peak Results**

| Name | RT     | Area     | % Area | Height (μV) | Amount | Units |
|------|--------|----------|--------|-------------|--------|-------|
| 1    | 9.765  | 41976772 | 49.44  | 1255408     |        |       |
| 2    | 14.672 | 42926468 | 50.56  | 773540      |        |       |

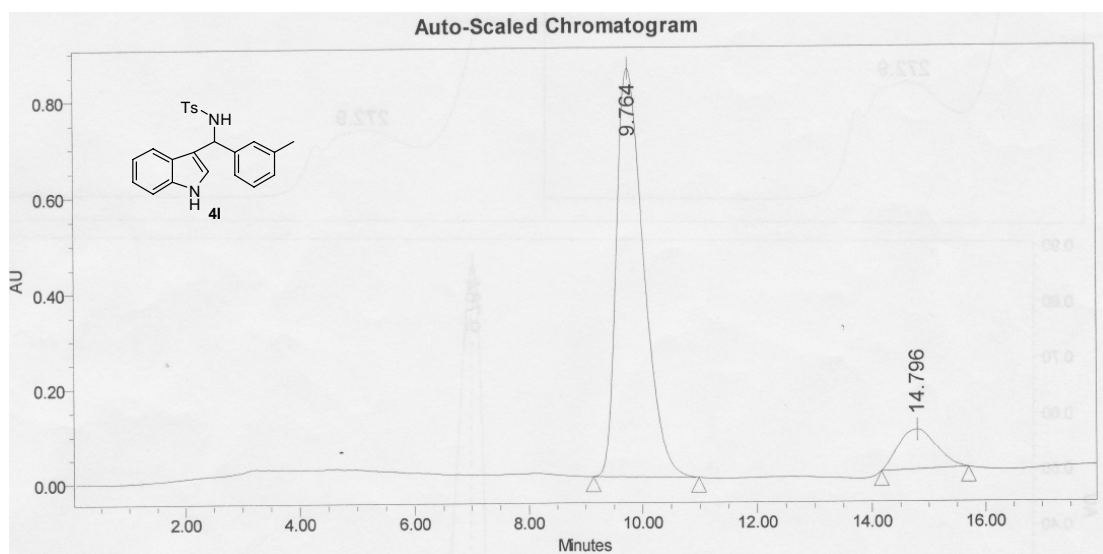

**Peak Results**

| Name | RT     | Area     | % Area | Height (μV) | Amount | Units |
|------|--------|----------|--------|-------------|--------|-------|
| 1    | 9.764  | 28352839 | 87.98  | 853033      |        |       |
| 2    | 14.796 | 3874288  | 12.02  | 83995       |        |       |

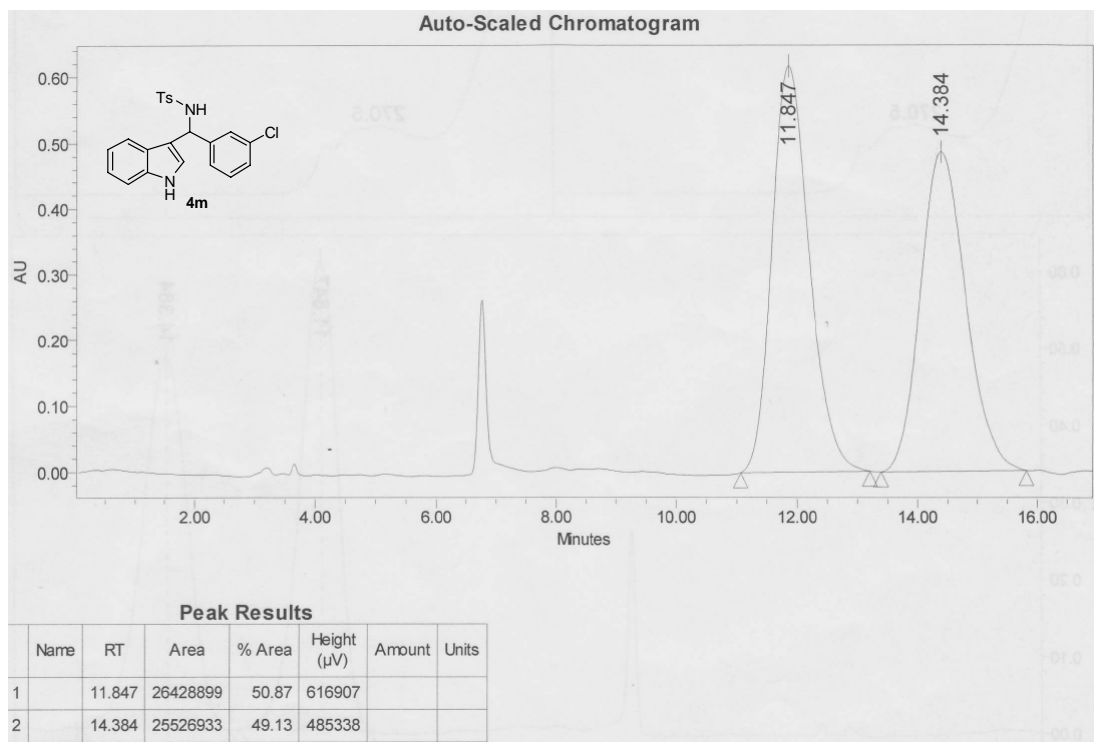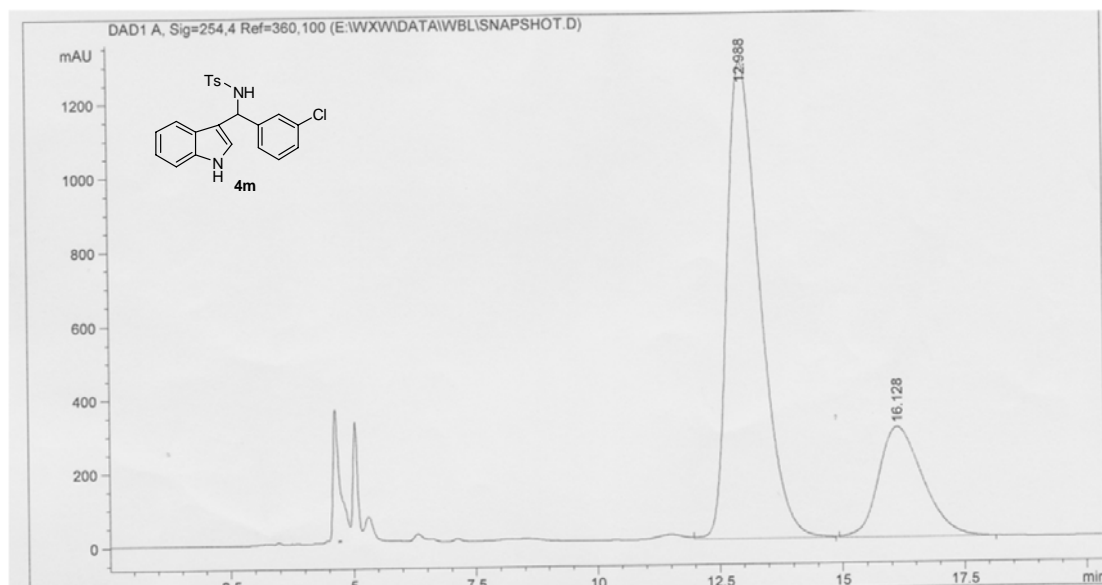

| Peak # | RetTime [min] | Type | Width [min] | Area [mAU*s] | Height [mAU] | Area %  |
|--------|---------------|------|-------------|--------------|--------------|---------|
| 1      | 12.988        | VB   | 0.7142      | 5.97189e4    | 1289.75598   | 76.2638 |
| 2      | 16.128        | BB   | 0.9671      | 1.85868e4    | 296.62292    | 23.7362 |

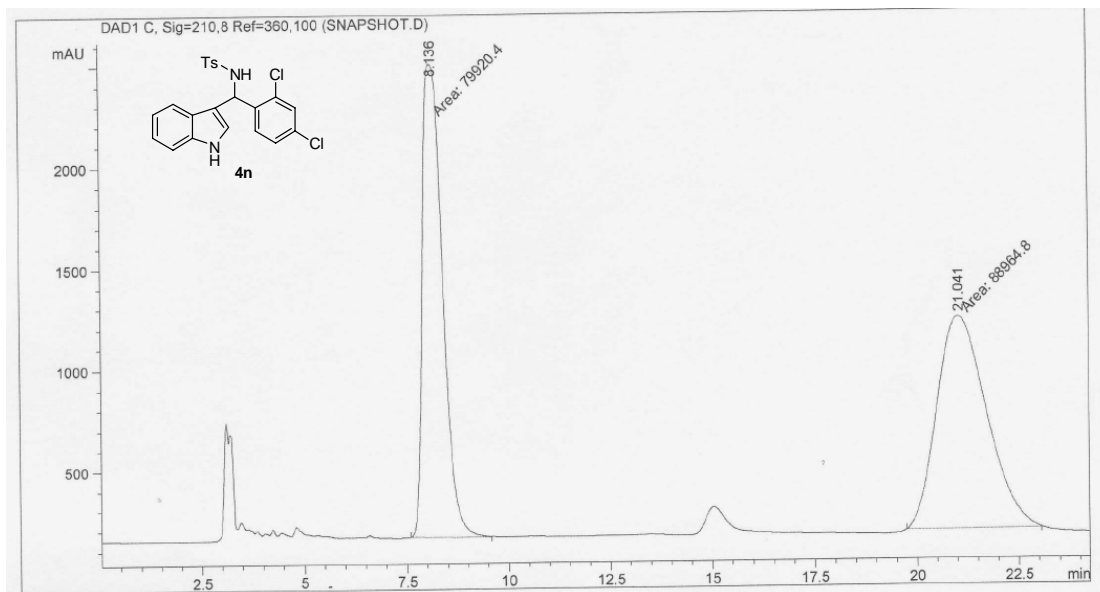

| Peak # | RetTime [min] | Type | Width [min] | Area [mAU*s] | Height [mAU] | Area %  |
|--------|---------------|------|-------------|--------------|--------------|---------|
| 1      | 8.136         | MM   | 0.5693      | 7.99204e4    | 2339.57178   | 47.3223 |
| 2      | 21.041        | MM   | 1.4121      | 8.89648e4    | 1050.02124   | 52.6777 |

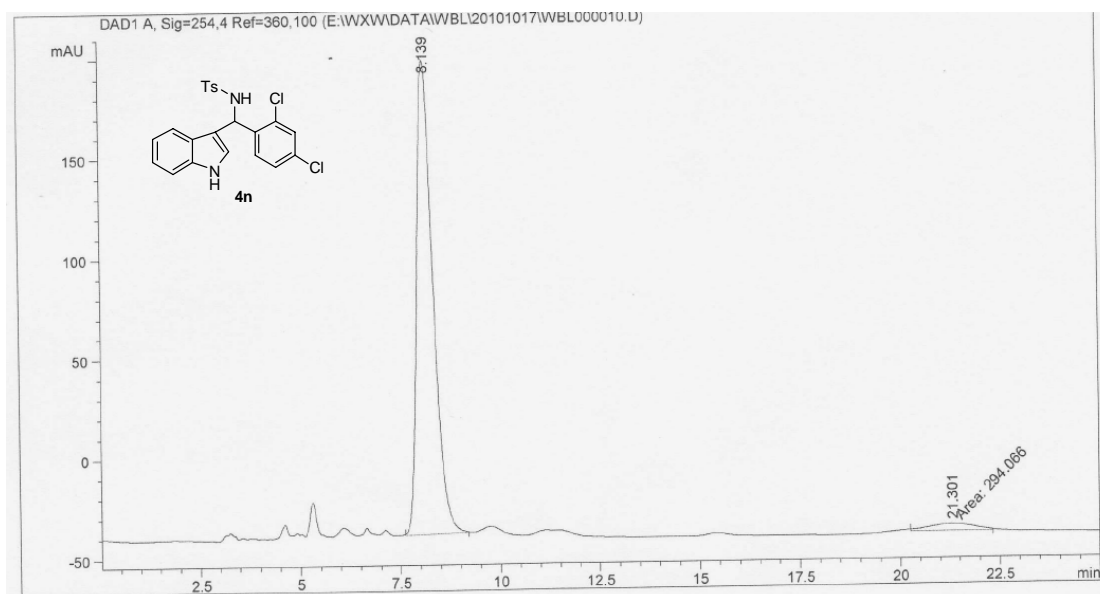

| Peak # | RetTime [min] | Type | Width [min] | Area [mAU*s] | Height [mAU] | Area %  |
|--------|---------------|------|-------------|--------------|--------------|---------|
| 1      | 8.139         | BB   | 0.4333      | 6647.92041   | 236.96684    | 95.7639 |
| 2      | 21.301        | MM   | 1.3463      | 294.06607    | 3.64047      | 4.2361  |

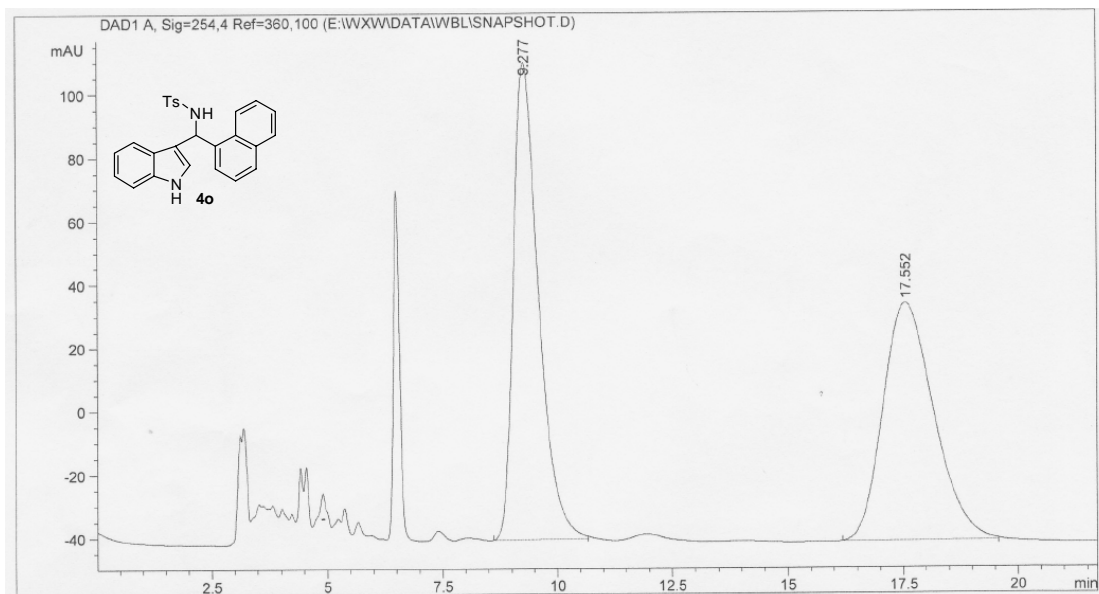

| Peak # | RetTime [min] | Type | Width [min] | Area [mAU*s] | Height [mAU] | Area %  |
|--------|---------------|------|-------------|--------------|--------------|---------|
| 1      | 9.277         | BB   | 0.5781      | 5697.80859   | 150.34492    | 49.7973 |
| 2      | 17.552        | BB   | 1.1855      | 5744.19922   | 74.67046     | 50.2027 |

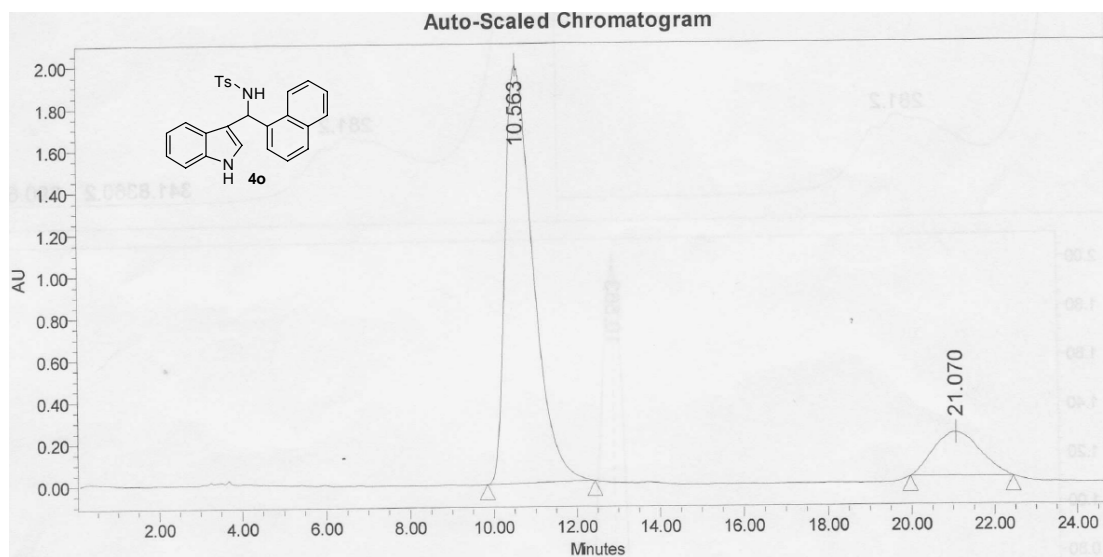

Peak Results

| Name | RT     | Area     | % Area | Height (μV) | Amount | Units |
|------|--------|----------|--------|-------------|--------|-------|
| 1    | 10.563 | 92772188 | 85.11  | 1988181     |        |       |
| 2    | 21.070 | 16225778 | 14.89  | 208550      |        |       |



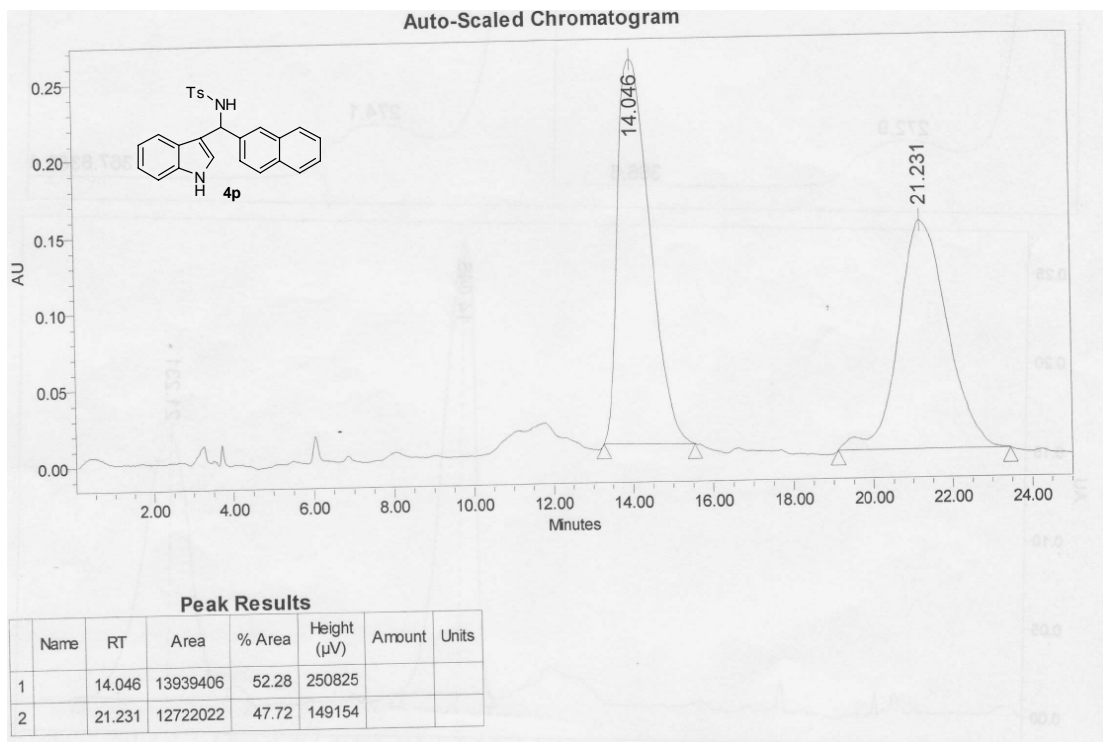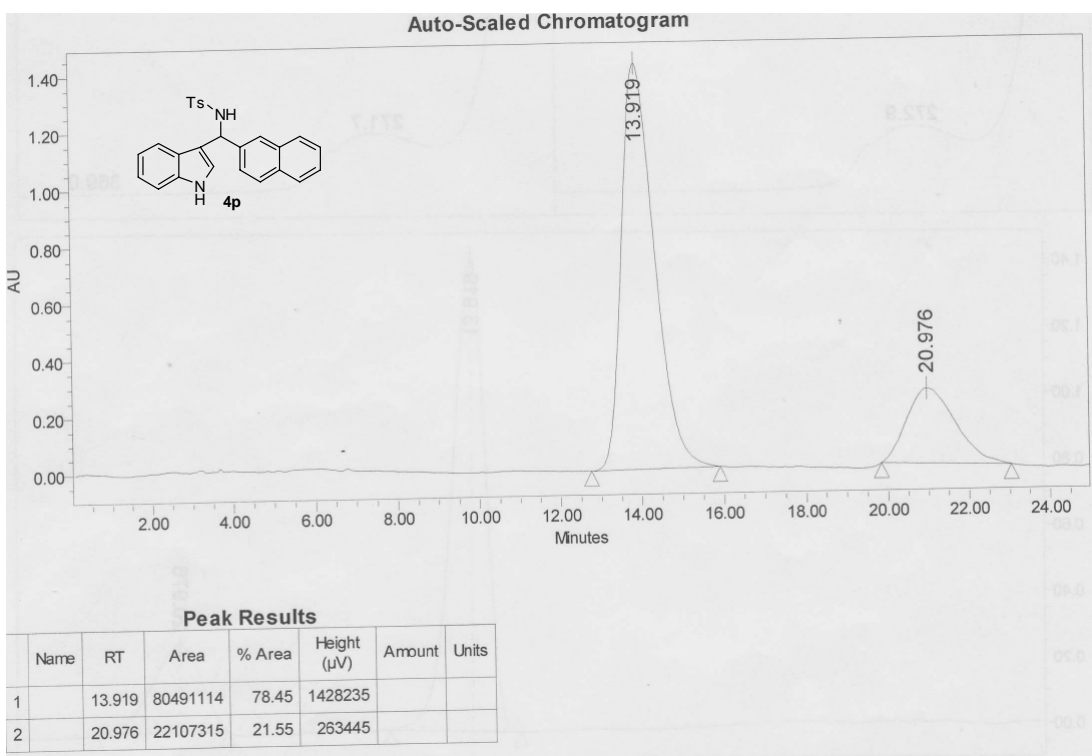

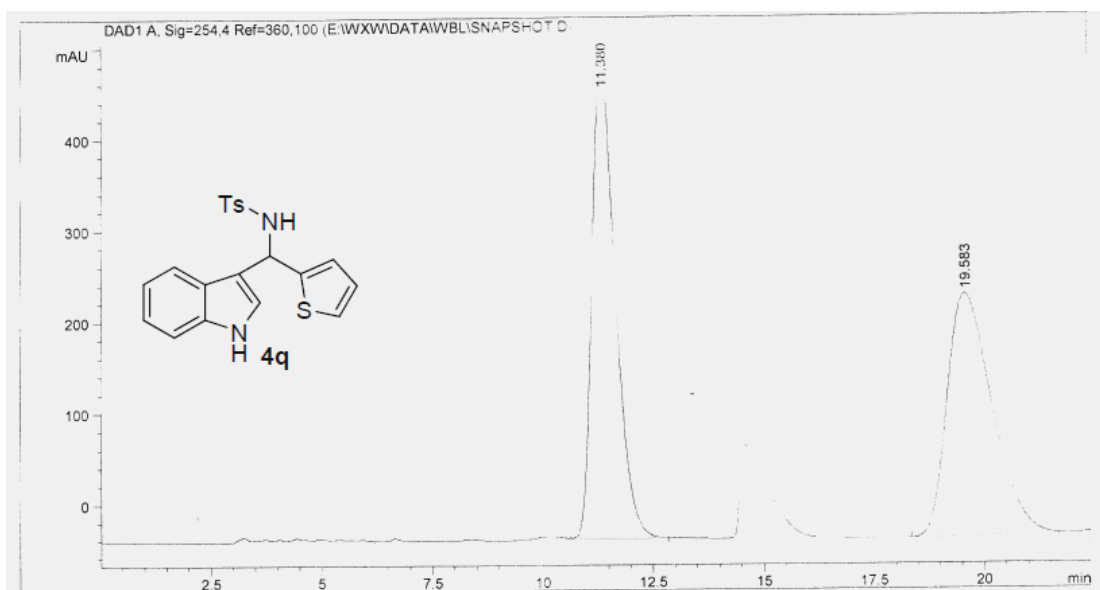

Signal 1: DAD1 A, Sig=254,4 Ref=360,100

| Peak #   | RetTime [min] | Type | Width [min] | Area [mAU*s] | Height [mAU] | Area %  |
|----------|---------------|------|-------------|--------------|--------------|---------|
| 1        | 11.380        | VB   | 0.5722      | 1.91938e4    | 518.06628    | 50.6625 |
| 2        | 19.583        | BB   | 1.0889      | 1.86918e4    | 265.64218    | 49.3375 |
| Totals : |               |      |             | 3.78856e4    | 783.70847    |         |

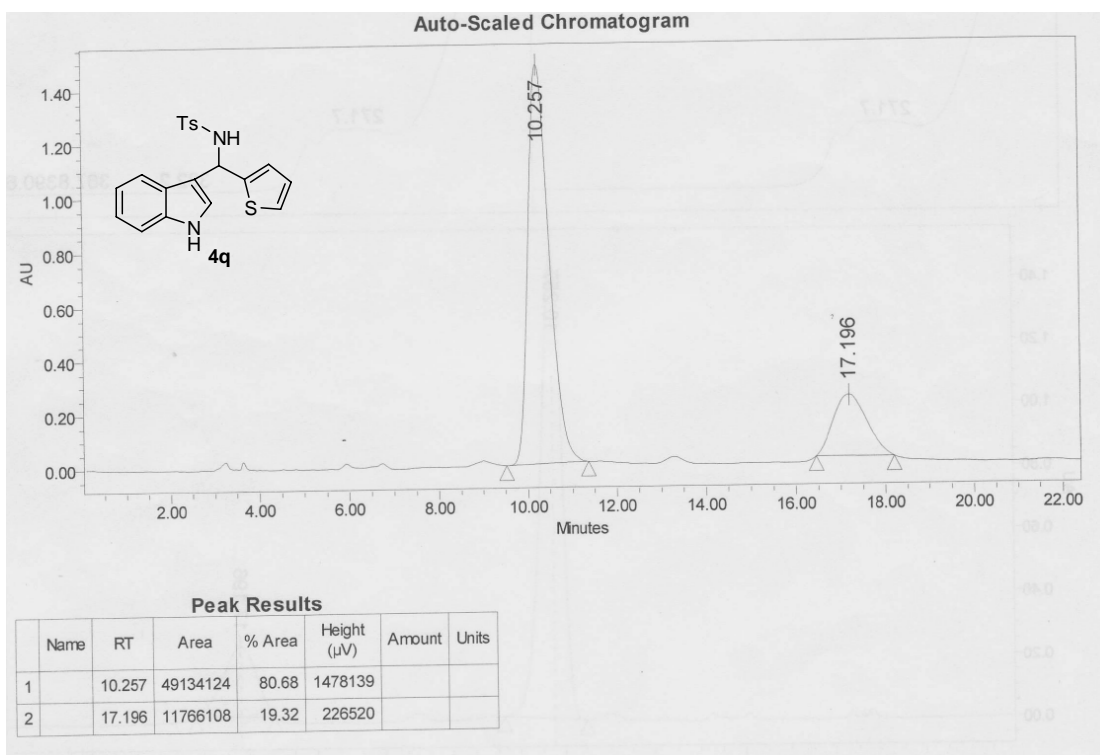

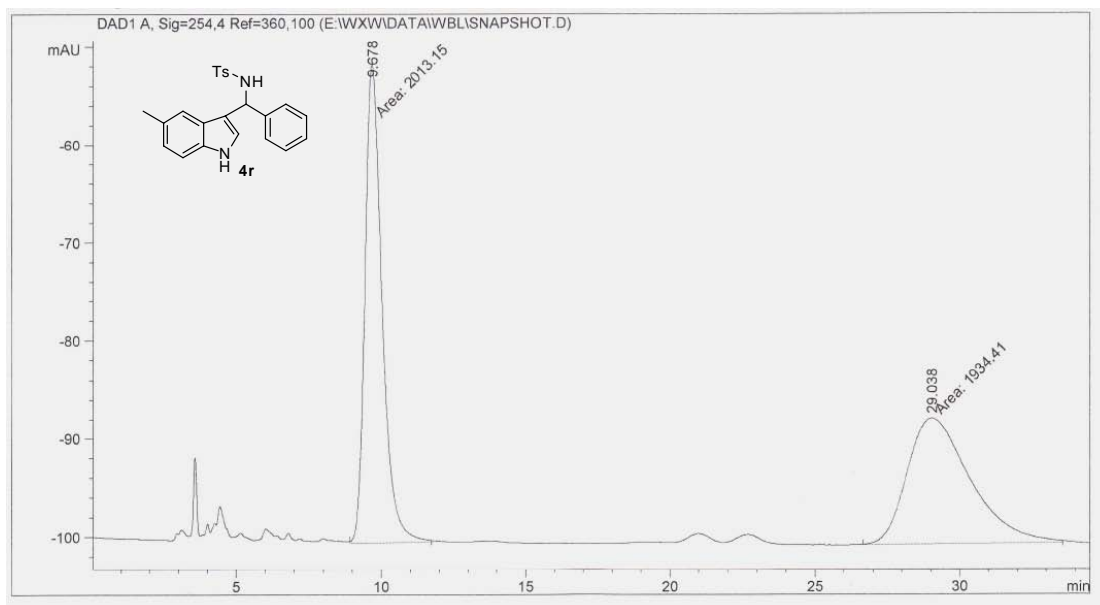

| Peak # | RetTime [min] | Type | Width [min] | Area [mAU*s] | Height [mAU] | Area %  |
|--------|---------------|------|-------------|--------------|--------------|---------|
| 1      | 9.678         | MM   | 0.6869      | 2013.15381   | 48.84984     | 50.9974 |
| 2      | 29.038        | MM   | 2.5164      | 1934.41003   | 12.81183     | 49.0026 |

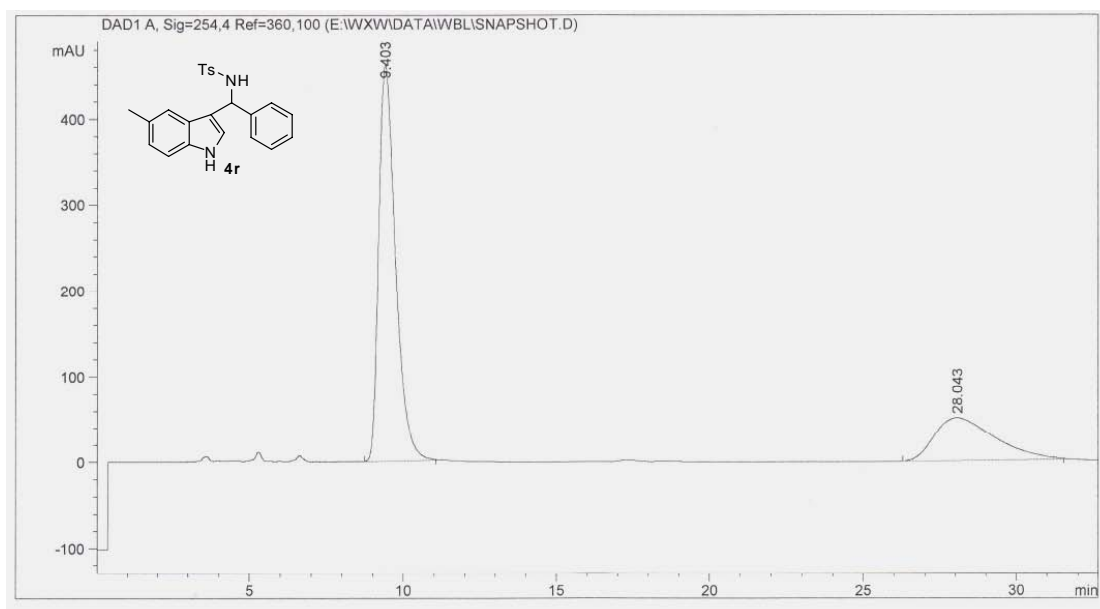

| Peak # | RetTime [min] | Type | Width [min] | Area [mAU*s] | Height [mAU] | Area %  |
|--------|---------------|------|-------------|--------------|--------------|---------|
| 1      | 9.403         | BB   | 0.5827      | 1.75613e4    | 460.68817    | 72.1197 |
| 2      | 28.043        | BB   | 1.9176      | 6788.93701   | 49.95131     | 27.8803 |

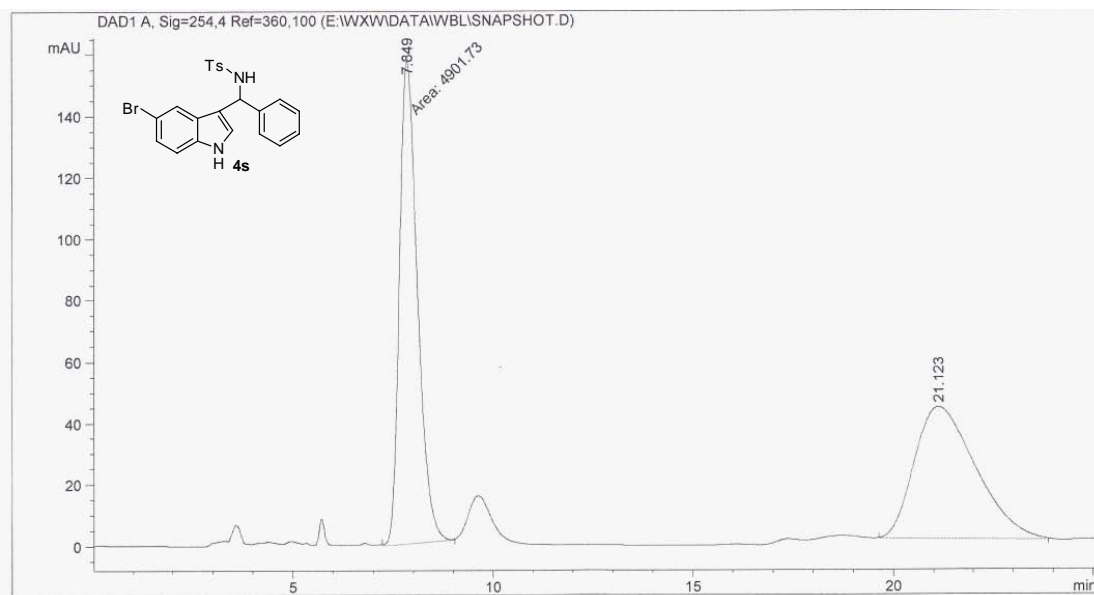

| Peak # | RetTime [min] | Type | Width [min] | Area [mAU*s] | Height [mAU] | Area %  |
|--------|---------------|------|-------------|--------------|--------------|---------|
| 1      | 7.849         | MM   | 0.5206      | 4901.72900   | 156.93617    | 51.8431 |
| 2      | 21.123        | BB   | 1.5261      | 4553.19629   | 42.90331     | 48.1569 |

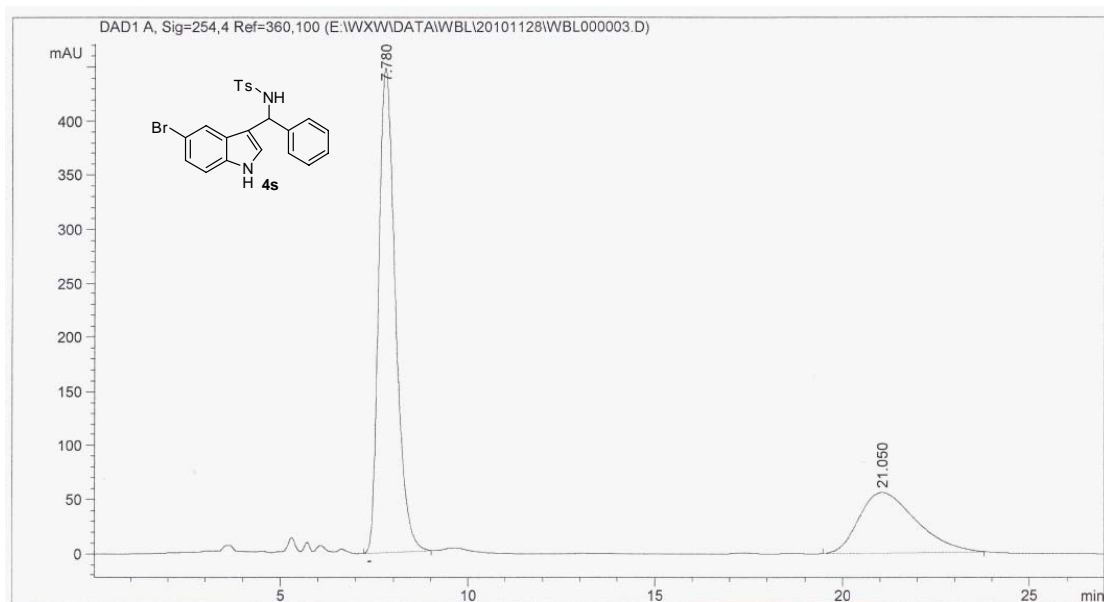

| Peak # | RetTime [min] | Type | Width [min] | Area [mAU*s] | Height [mAU] | Area %  |
|--------|---------------|------|-------------|--------------|--------------|---------|
| 1      | 7.780         | BB   | 0.4783      | 1.38951e4    | 447.40002    | 70.4390 |
| 2      | 21.050        | BB   | 1.5339      | 5831.36230   | 55.22432     | 29.5610 |

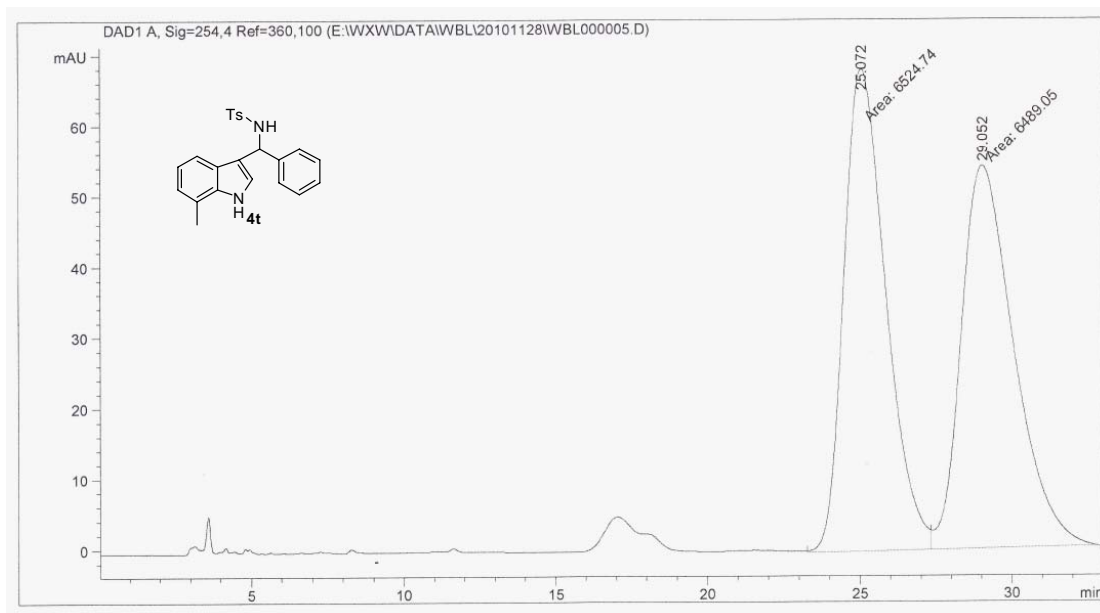

| Peak # | RetTime [min] | Type | Width [min] | Area [mAU*s] | Height [mAU] | Area %  |
|--------|---------------|------|-------------|--------------|--------------|---------|
| 1      | 25.072        | MF   | 1.5960      | 6524.73584   | 68.13607     | 50.1371 |
| 2      | 29.052        | FM   | 2.0044      | 6489.05225   | 53.95677     | 49.8629 |

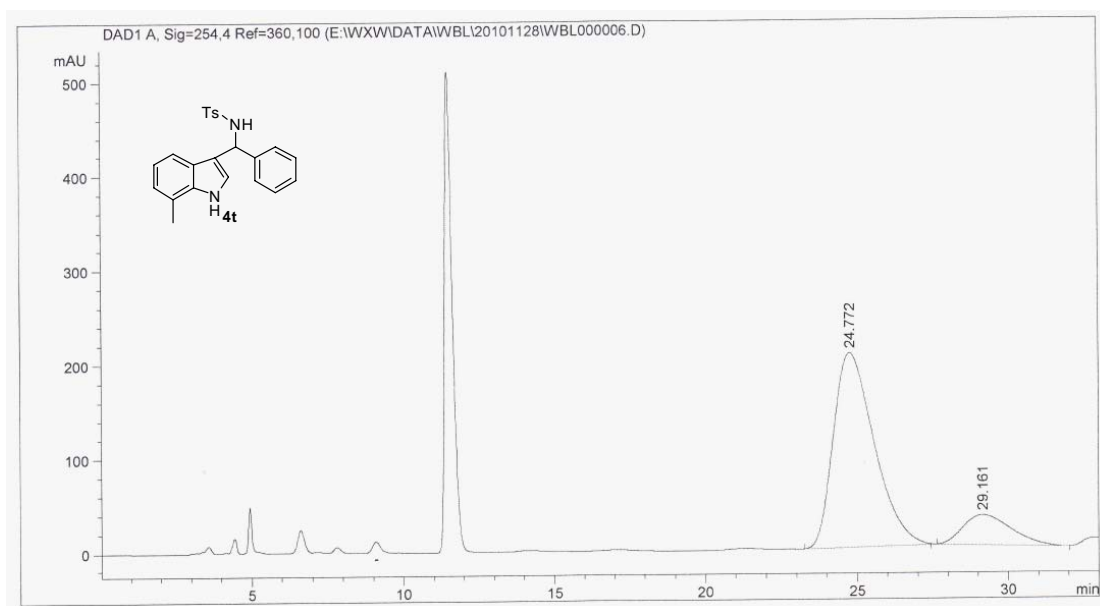

| Peak # | RetTime [min] | Type | Width [min] | Area [mAU*s] | Height [mAU] | Area %  |
|--------|---------------|------|-------------|--------------|--------------|---------|
| 1      | 24.772        | BB   | 1.4253      | 1.92860e4    | 206.18800    | 84.7856 |
| 2      | 29.161        | BB   | 1.6099      | 3460.77954   | 31.35092     | 15.2144 |

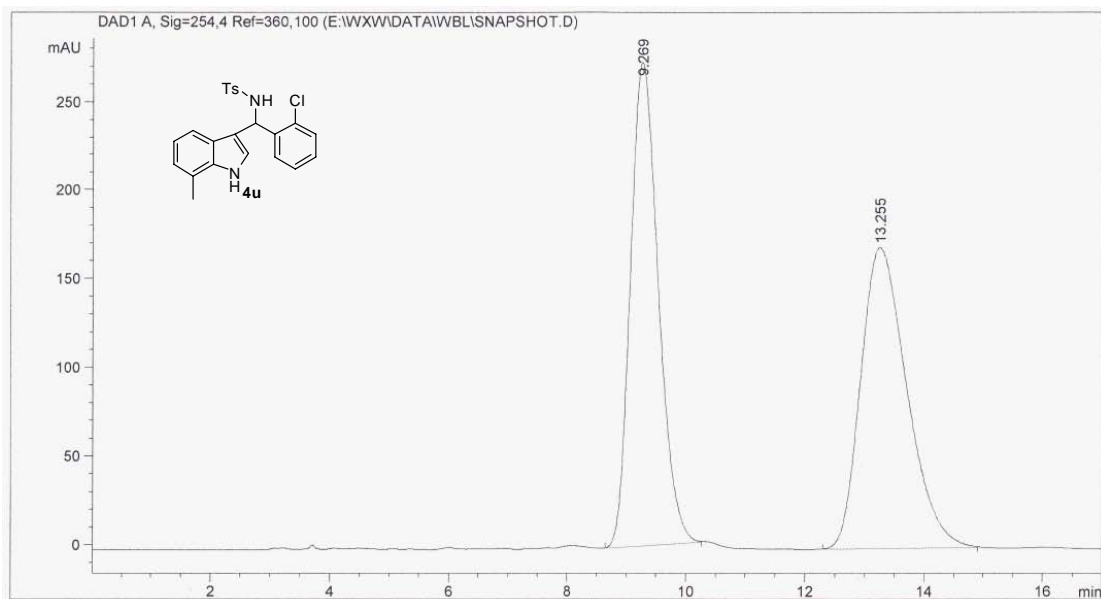

| Peak # | RetTime [min] | Type | Width [min] | Area [mAU*s] | Height [mAU] | Area %  |
|--------|---------------|------|-------------|--------------|--------------|---------|
| 1      | 9.269         | BB   | 0.5046      | 8886.19629   | 272.41666    | 49.4492 |
| 2      | 13.255        | BB   | 0.8246      | 9084.15430   | 169.12946    | 50.5508 |

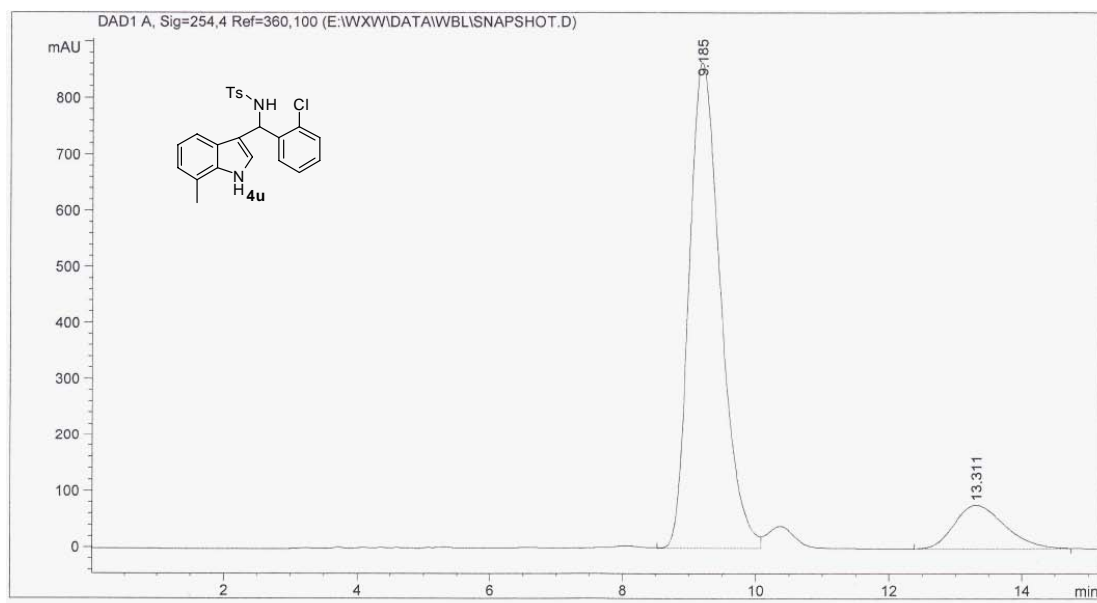

| Peak # | RetTime [min] | Type | Width [min] | Area [mAU*s] | Height [mAU] | Area %  |
|--------|---------------|------|-------------|--------------|--------------|---------|
| 1      | 9.185         | VV   | 0.5045      | 2.83035e4    | 863.39056    | 87.3961 |
| 2      | 13.311        | BB   | 0.8236      | 4081.80273   | 76.85224     | 12.6039 |

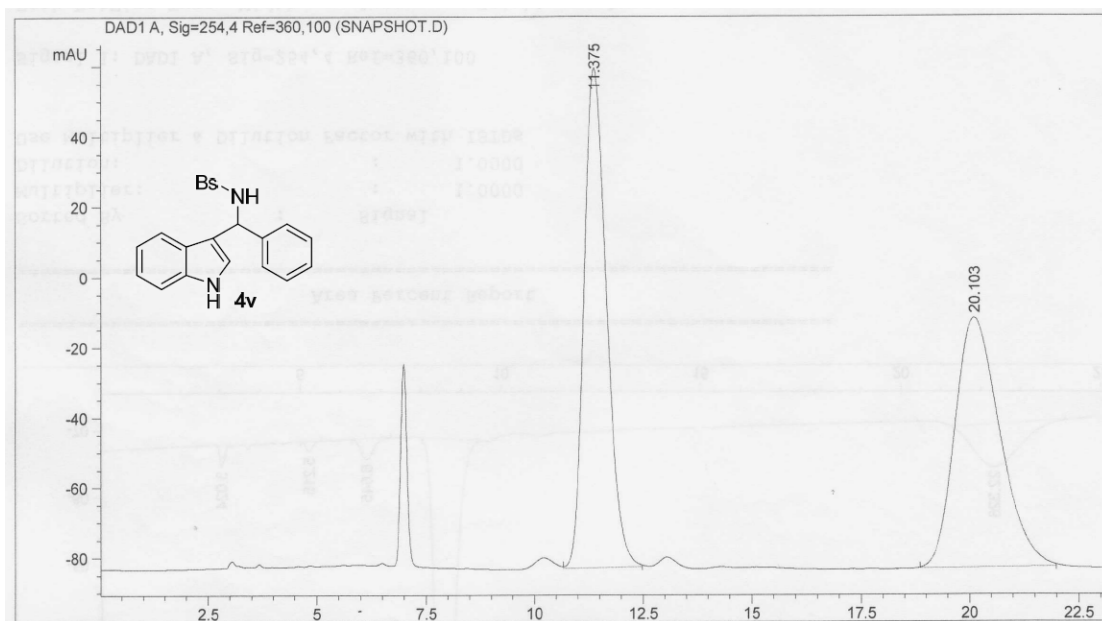

| Peak # | RetTime [min] | Type | Width [min] | Area [mAU*s] | Height [mAU] | Area %  |
|--------|---------------|------|-------------|--------------|--------------|---------|
| 1      | 11.375        | VB   | 0.5606      | 5124.65332   | 142.14076    | 50.1822 |
| 2      | 20.103        | BB   | 1.1108      | 5087.43115   | 70.93317     | 49.8178 |

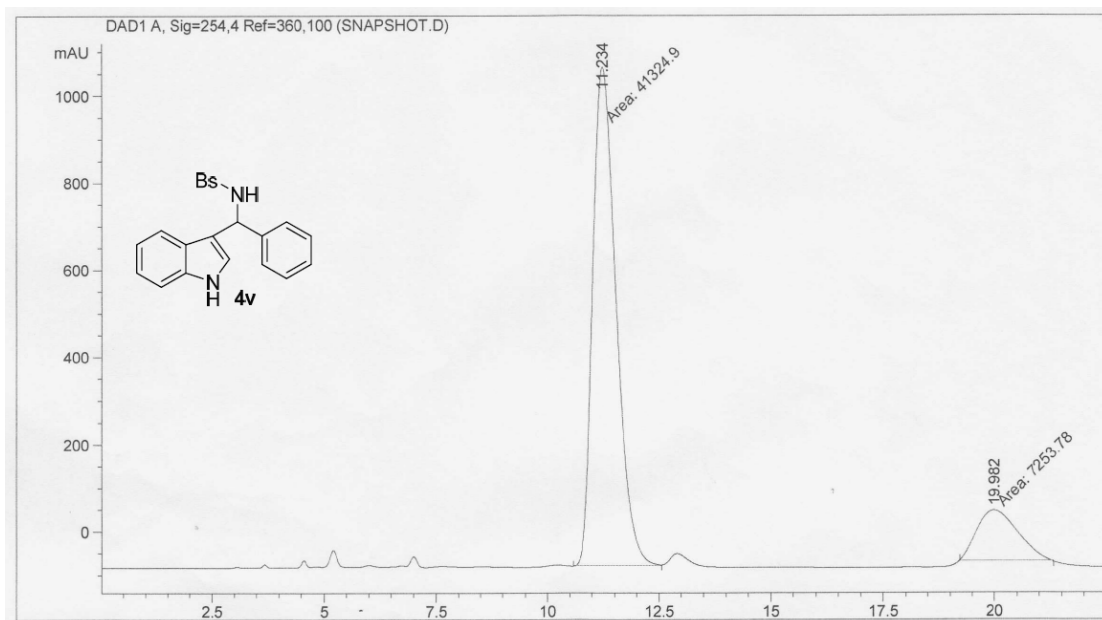

| Peak # | RetTime [min] | Type | Width [min] | Area [mAU*s] | Height [mAU] | Area %  |
|--------|---------------|------|-------------|--------------|--------------|---------|
| 1      | 11.234        | MM   | 0.6028      | 4.13249e4    | 1142.60632   | 85.0680 |
| 2      | 19.982        | MM   | 1.0500      | 7253.77637   | 115.13707    | 14.9320 |
